# Supplementary material for: Expanding the Repertoire of Spongian-16-One Derivatives in Australian Nudibranchs of the Genus Goniobranchus and Evaluation of Their Anatomical Distribution
Source: MDPI journal article supplement (doi:10.3390/md19120680), 2021-11-29

# Expanding the repertoire of spongian-16-one derivatives by evaluation of their anatomical distribution in Australian nudibranchs of the genus *Goniobranchus*.

Louise C. Forster<sup>1</sup>, Jack K. Clegg<sup>1</sup>, Karen L. Cheney<sup>2</sup>, and Mary J. Garson<sup>1,\*</sup>

<sup>1</sup> School of Chemistry and Molecular Biosciences, The University of Queensland, St. Lucia, QLD 4072, Australia; l.forster1@uq.edu.au; j.clegg@uq.edu.au; m.garson@uq.edu.au.

<sup>2</sup> School of Biological Sciences, The University of Queensland, St. Lucia, QLD 4072, Australia; k.cheney@uq.edu.au.

## Contents

|                                                                                                                                                                                                                                                          |    |
|----------------------------------------------------------------------------------------------------------------------------------------------------------------------------------------------------------------------------------------------------------|----|
| Anatomical distribution.....                                                                                                                                                                                                                             | 4  |
| Anatomical distribution of metabolites in <i>G. aureopurpureus</i> .....                                                                                                                                                                                 | 4  |
| Table S1 Distribution of diterpenes in <i>G. aureopurpureus</i> organs.....                                                                                                                                                                              | 4  |
| Anatomical distribution of metabolites in <i>Goniobranchus</i> sp. 1 .....                                                                                                                                                                               | 5  |
| Table S2 Distribution of diterpenes in <i>Goniobranchus</i> sp. 1 organs.....                                                                                                                                                                            | 5  |
| X-Ray crystallography .....                                                                                                                                                                                                                              | 5  |
| X-ray crystallographic structure determination .....                                                                                                                                                                                                     | 5  |
| Figure S2. Oak Ridge Thermal Ellipsoid Plot (ORTEP) representation of the crystal structure of (-)-13-acetoxy-20-hydroxy-7 $\alpha$ -oxyspongian-16-one-7 $\alpha$ -(3-methyl)-butanoate 4 shown with only one component of each region of disorder..... | 6  |
| Assorted spectra .....                                                                                                                                                                                                                                   | 7  |
| Figure S3. <sup>1</sup> H NMR spectrum of 1 (700 MHz, CDCl <sub>3</sub> ).....                                                                                                                                                                           | 7  |
| Figure S4. HSQC spectrum of 1 (700 MHz, CDCl <sub>3</sub> ).....                                                                                                                                                                                         | 7  |
| Figure S5. HMBC spectrum of 1 (700 MHz, CDCl <sub>3</sub> ).....                                                                                                                                                                                         | 8  |
| Figure S6. COSY spectrum of 1 (700 MHz, CDCl <sub>3</sub> ).....                                                                                                                                                                                         | 8  |
| Figure S7. NOESY spectrum of 1 (700 MHz, CDCl <sub>3</sub> ).....                                                                                                                                                                                        | 9  |
| Figure S8. <sup>1</sup> H NMR spectrum of 2 (700 MHz, CDCl <sub>3</sub> ).....                                                                                                                                                                           | 9  |
| Figure S9. HSQC spectrum of 2 (700 MHz, CDCl <sub>3</sub> ).....                                                                                                                                                                                         | 10 |
| Figure S10. HMBC spectrum of 2 (700 MHz, CDCl <sub>3</sub> ).....                                                                                                                                                                                        | 10 |
| Figure S11. COSY spectrum of 2 (700 MHz, CDCl <sub>3</sub> ).....                                                                                                                                                                                        | 11 |
| Figure S12. NOESY spectrum of 2 (700 MHz, CDCl <sub>3</sub> ).....                                                                                                                                                                                       | 11 |
| Figure S13. <sup>1</sup> H NMR spectrum of 3 (700 MHz, CDCl <sub>3</sub> ), collected in a Shigemi NMR tube. ....                                                                                                                                        | 12 |
| Figure S14. HSQC spectrum of 3 (700 MHz, CDCl <sub>3</sub> ), collected in a Shigemi NMR tube. ....                                                                                                                                                      | 12 |
| Figure S15. HMBC spectrum of 3 (700 MHz, CDCl <sub>3</sub> ), collected in a Shigemi NMR tube. ....                                                                                                                                                      | 13 |
| Figure S16. COSY spectrum of 3 (700 MHz, CDCl <sub>3</sub> ), collected in a Shigemi NMR tube. ....                                                                                                                                                      | 13 |
| Figure S17. <sup>1</sup> H NMR spectrum of 4 (700 MHz, CDCl <sub>3</sub> ).....                                                                                                                                                                          | 14 |
| Figure S18. HSQC spectrum of 4 (700 MHz, CDCl <sub>3</sub> ).....                                                                                                                                                                                        | 14 |
| Figure S19. HMBC spectrum of 4 (700 MHz, CDCl <sub>3</sub> ).....                                                                                                                                                                                        | 15 |
| Figure S20. COSY spectrum of 4 (700 MHz, CDCl <sub>3</sub> ).....                                                                                                                                                                                        | 15 |
| Figure S21. NOESY spectrum of 4 (700 MHz, CDCl <sub>3</sub> ).....                                                                                                                                                                                       | 16 |
| Figure S22. <sup>1</sup> H NMR spectrum of 5 (700 MHz, CDCl <sub>3</sub> ).....                                                                                                                                                                          | 16 |
| Figure S23. HSQC spectrum of 5 (700 MHz, CDCl <sub>3</sub> ).....                                                                                                                                                                                        | 17 |
| Figure S24. HMBC spectrum of 5 (700 MHz, CDCl <sub>3</sub> ).....                                                                                                                                                                                        | 17 |
| Figure S25. COSY spectrum of 5 (700 MHz, CDCl <sub>3</sub> ).....                                                                                                                                                                                        | 18 |
| Figure S26. NOESY spectrum of 5 (700 MHz, CDCl <sub>3</sub> ).....                                                                                                                                                                                       | 18 |
| Figure S27. <sup>1</sup> H NMR spectrum of 6 (700 MHz, CDCl <sub>3</sub> ).....                                                                                                                                                                          | 19 |
| Figure S28. HSQC spectrum of 6 (700 MHz, CDCl <sub>3</sub> ).....                                                                                                                                                                                        | 19 |
| Figure S29. HMBC spectrum of 6 (700 MHz, CDCl <sub>3</sub> ).....                                                                                                                                                                                        | 20 |

|                                                                                                                                                       |    |
|-------------------------------------------------------------------------------------------------------------------------------------------------------|----|
| Figure S30. COSY spectrum of 6 (700 MHz, CDCl <sub>3</sub> ).....                                                                                     | 20 |
| Figure S31. NOESY spectrum of 6 (700 MHz, CDCl <sub>3</sub> ). ....                                                                                   | 21 |
| Figure S32. <sup>1</sup> H NMR spectrum of 7 (700 MHz, CDCl <sub>3</sub> ). ....                                                                      | 21 |
| Figure S33. HSQC spectrum of 7 (700 MHz, CDCl <sub>3</sub> ).....                                                                                     | 22 |
| Figure S34. HMBC spectrum of 7 (700 MHz, CDCl <sub>3</sub> ).....                                                                                     | 22 |
| Figure S35. COSY spectrum of 7 (700 MHz, CDCl <sub>3</sub> ).....                                                                                     | 23 |
| Figure S36. NOSEY spectrum of 7 (700 MHz, CDCl <sub>3</sub> ). ....                                                                                   | 23 |
| Figure S37. <sup>1</sup> H NMR spectrum of 8 (700 MHz, CDCl <sub>3</sub> ). ....                                                                      | 24 |
| Figure S38. HSQC spectrum of 8 (500 MHz, CDCl <sub>3</sub> ).....                                                                                     | 24 |
| Figure S39. HMBC spectrum of 8 (700 MHz, CDCl <sub>3</sub> ).....                                                                                     | 25 |
| Figure S40. COSY spectrum of 8 (500 MHz, CDCl <sub>3</sub> ).....                                                                                     | 25 |
| Figure S41. NOESY spectrum of 8 (700 MHz, CDCl <sub>3</sub> ). ....                                                                                   | 26 |
| Figure S42. <sup>1</sup> H NMR spectrum of 9 (500 MHz, CDCl <sub>3</sub> ). ....                                                                      | 26 |
| Figure S43. HSQC spectrum of 9 (500 MHz, CDCl <sub>3</sub> ).....                                                                                     | 27 |
| Figure S44. HMBC spectrum of 9 (500 MHz, CDCl <sub>3</sub> ).....                                                                                     | 27 |
| Figure S45. COSY spectrum of 9 (500 MHz, CDCl <sub>3</sub> ).....                                                                                     | 28 |
| Figure S46. NOESY spectrum of 9 (500 MHz, CDCl <sub>3</sub> ). ....                                                                                   | 28 |
| Figure S47. <sup>1</sup> H NMR spectrum of 10 (700 MHz, CDCl <sub>3</sub> ). ....                                                                     | 29 |
| Figure S48. HSQC spectrum of 10 (700 MHz, CDCl <sub>3</sub> ).....                                                                                    | 29 |
| Figure S49. HMBC spectrum of 10 (700 MHz, CDCl <sub>3</sub> ).....                                                                                    | 30 |
| Figure S50. COSY spectrum of 10 (700 MHz, CDCl <sub>3</sub> ).....                                                                                    | 30 |
| Figure S51. NOESY spectrum of 10 (700 MHz, CDCl <sub>3</sub> ). ....                                                                                  | 31 |
| Figure S52. <sup>1</sup> H NMR spectrum of 11 (700 MHz, CDCl <sub>3</sub> ). ....                                                                     | 31 |
| Figure S53. HSQC spectrum of 11 (700 MHz, CDCl <sub>3</sub> ).....                                                                                    | 32 |
| Figure S54. HMBC spectrum of 11 (700 MHz, CDCl <sub>3</sub> ).....                                                                                    | 32 |
| Figure S55. COSY spectrum of 11 (700 MHz, CDCl <sub>3</sub> ).....                                                                                    | 33 |
| Figure S56. NOESY spectrum of 11 (700 MHz, CDCl <sub>3</sub> ). ....                                                                                  | 33 |
| Figure S57. Overlay of <sup>1</sup> H NMR spectra for the mantle of six specimens of <i>G. aureopurpureus</i> (500 MHz, CDCl <sub>3</sub> ). ....     | 34 |
| Figure S58. Overlay of <sup>1</sup> H NMR spectra for the viscera of six specimens of <i>G. aureopurpureus</i> (500 MHz, CDCl <sub>3</sub> ). ....    | 35 |
| Figure S59. Overlay of <sup>1</sup> H NMR spectra for the mantle and viscera of <i>G. aureopurpureus</i> (500 MHz, CDCl <sub>3</sub> ). ....          | 36 |
| Figure S60. Overlay of <sup>1</sup> H NMR spectra for the mantle of three specimens of <i>Goniobranchus sp.1</i> (500 MHz, CDCl <sub>3</sub> ). ....  | 37 |
| Figure S61. Overlay of <sup>1</sup> H NMR spectra for the viscera of three specimens of <i>Goniobranchus sp.1</i> (500 MHz, CDCl <sub>3</sub> ). .... | 38 |
| Figure S62. Overlay of <sup>1</sup> H NMR spectra for the mantle and viscera of <i>Goniobranchus sp.1</i> (500 MHz, CDCl <sub>3</sub> ). ....         | 39 |

**Figure S1.** Image of the specimen of *Goniobranchus aureopurpureus* and *Goniobranchus* sp. 1.

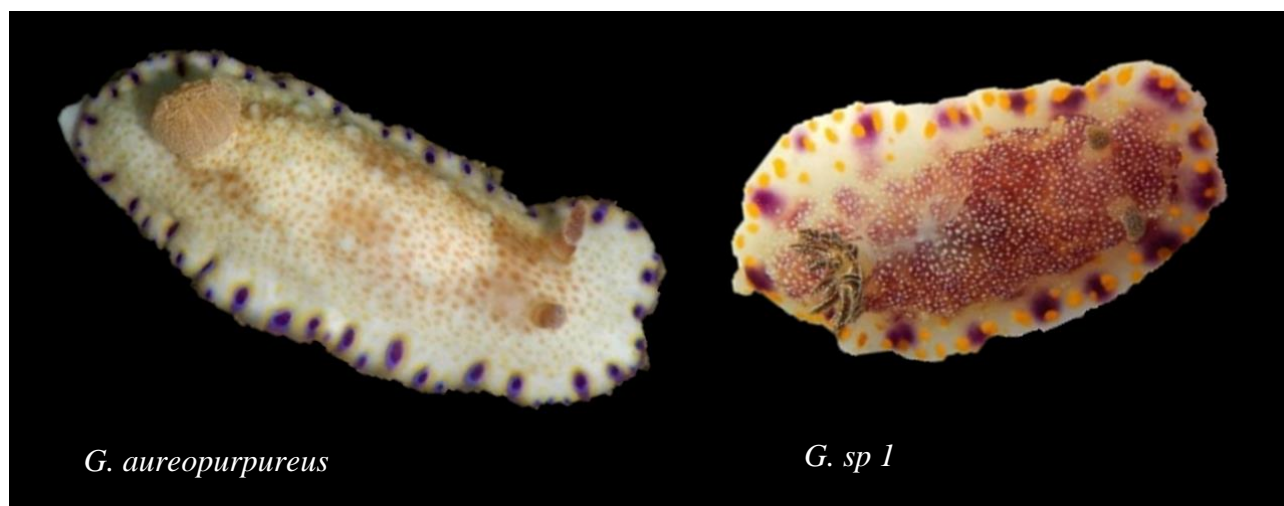

## Anatomical distribution

### Anatomical distribution of metabolites in *G. aureopurpureus*

The specimens of *G. aureopurpureus* were dissected into their mantle and viscera. The body parts were extracted separately, and the extracts compared by  $^1\text{H}$  NMR spectroscopy (**Table S1**). The new metabolites (**1-5**) were only isolated from the mantle tissue.

**Table S1** Distribution of diterpenes in *G. aureopurpureus* organs.

| Compound                                                                                                   | Present in   |
|------------------------------------------------------------------------------------------------------------|--------------|
| 15-desacetoxy-12-acetoxydendrillolide A                                                                    | Mantle       |
| 7 $\alpha$ -acetoxy-6 $\beta$ -hydroxyspongian-16-one ( <b>5</b> )                                         | Mantle       |
| 6 $\beta$ -hydroxy-7 $\alpha$ -oxyspongian-16-one-7 $\alpha$ -(2-methyl)-butanoate ( <b>3</b> )            | Mantle       |
| 20-acetoxy-6 $\beta$ -hydroxy-7 $\alpha$ -oxyspongian-16-one-7 $\alpha$ -(2-methyl)-butanoate ( <b>2</b> ) | Mantle       |
| 13-acetoxy-20-hydroxy-7 $\alpha$ -oxyspongian-16-one-7 $\alpha$ -(2-methyl)-butanoate ( <b>1</b> )         | Mantle       |
| 13-acetoxy-20-hydroxy-7 $\alpha$ -oxyspongian-16-one-7 $\alpha$ -(3-methyl)-butanoate ( <b>4</b> )         | Mantle       |
| shahamin C                                                                                                 | Mantle       |
| luffarin-X                                                                                                 | Viscera      |
| polyrhaphin A                                                                                              | Viscera      |
| 15,16-diacetoxyshahamin B                                                                                  | Viscera      |
| 12-desacetoxypolyrhaphin A                                                                                 | Viscera      |
| spongian-16-one                                                                                            | Both tissues |
| 7 $\alpha$ -acetoxy-spongian-16-one                                                                        | Both tissues |
| macfarlandin E                                                                                             | Both tissues |
| aplyviolene                                                                                                | Both tissues |
| polyrhaphin B                                                                                              | Both tissues |
| secoshahamin                                                                                               | Both tissues |

## Anatomical distribution of metabolites in *Goniobranhus* sp. 1

The specimens of *Goniobranhus* sp. 1 were dissected into the mantle and viscera. The anatomical distribution was explored through the comparison of the mantle and viscera chemical profiles (**Table S2**). Like *G. aureopurpureus* only the mantle was found to have the newly elucidated metabolites (**6-11**).

**Table S2 Distribution of diterpenes in *Goniobranhus* sp. 1 organs.**

| Compound                                                                        | Present in   |
|---------------------------------------------------------------------------------|--------------|
| 20-acetoxy,12 $\alpha$ -oxyspongian-16-one-12 $\alpha$ -propionate ( <b>6</b> ) | Mantle       |
| 20-acetoxy-13-hydroxy-spongian-16-one ( <b>7</b> )                              | Mantle       |
| 12-hydroxyspongian-16-one ( <b>8</b> )                                          | Mantle       |
| 12-hydroxy-20-oxyspongian-16-one-20-propionate ( <b>9</b> )                     | Mantle       |
| 12-hydroxy-11,20-dioxyspongian-16-one-11,20-dipropionate ( <b>10</b> )          | Mantle       |
| 11-hydroxy-12,20-dioxyspongian-16-one-12,20-dipropionate ( <b>11</b> )          | Mantle       |
| 20-oxyspongian-16-one-propionate                                                | Mantle       |
| 12 $\alpha$ ,20-dioxyspongian-16-one-dipropionate                               | Mantle       |
| 12 $\alpha$ -acetoxy,20-oxyspongian-16-one-20-propionate                        | Mantle       |
| spongian-16-one                                                                 | Viscera      |
| 7 $\alpha$ -acetoxyspongian-16-one                                              | Viscera      |
| isoagatholactone                                                                | Both tissues |
| 12 $\alpha$ -acetoxyspongian-16-one                                             | Both tissues |
| 20-acetoxyspongian-16-one                                                       | Both tissues |
| 12 $\alpha$ ,20-diacetoxyspongian-16-one                                        | Both tissues |

## X-Ray crystallography

### X-ray crystallographic structure determination

Data were collected using an Oxford Rigaku Synergy-S employing confocal mirror monochromated Mo-K $\alpha$  radiation generated from a microfocus source (0.71073 Å) with  $\omega$  and  $\psi$  scans at 100(2) K. Data integration and reduction were undertaken with CrysAlisPro [1]. Subsequent computations were carried out using Olex2 [2]. Structures were solved with ShelXT [3] and refined and extended with ShelXL [4]. While the Flack parameters had an error associated with them, the relative configurations of each structure are unambiguous. The refinement of **1** was unremarkable, while the refinement of **4** was affected by disorder present in the structure for the 3-methylbutanoate side chain. The model employed indicated that the crystal was actually a 3:1 mixture of **4** and **1**. The ester side-chains were modelled isotropically. Crystallographic data are summarized below and the CIF has been deposited at the Cambridge Crystallographic Data Centre with CCDC 2117159-2117160. It is available free of charge from the Cambridge Crystallographic Data Centre, 12 16 Union Road, Cambridge CB2 1 EZ, UK; fax: (+44) 1223-336-033; or e-mail: deposit@ccdc.cam.ac.uk.

References:

1. Rigaku Oxford Diffraction *CrysAlisPro* Rigaku Oxford Diffraction Ltd: Yarton, Oxfordshire, UK, **2009-2021**
2. Dolomanov, O. V.; Bourhis, L. J.; Gildea, R. J.; Howard, J. A. K.; Puschmann, H., *OLEX2*: a complete structure solution, refinement and analysis program, *J. Appl. Cryst.* **2009**, *42*, 339
3. Sheldrick, G. M., SHELXT - Integrated space-group and crystal-structure determination, *Acta Cryst.* **2015**, *A71*, 3-8.
4. Sheldrick, G. M., Crystal structure refinement with SHELXL, *Acta Cryst.* **2015**, *C71*, 3-8.

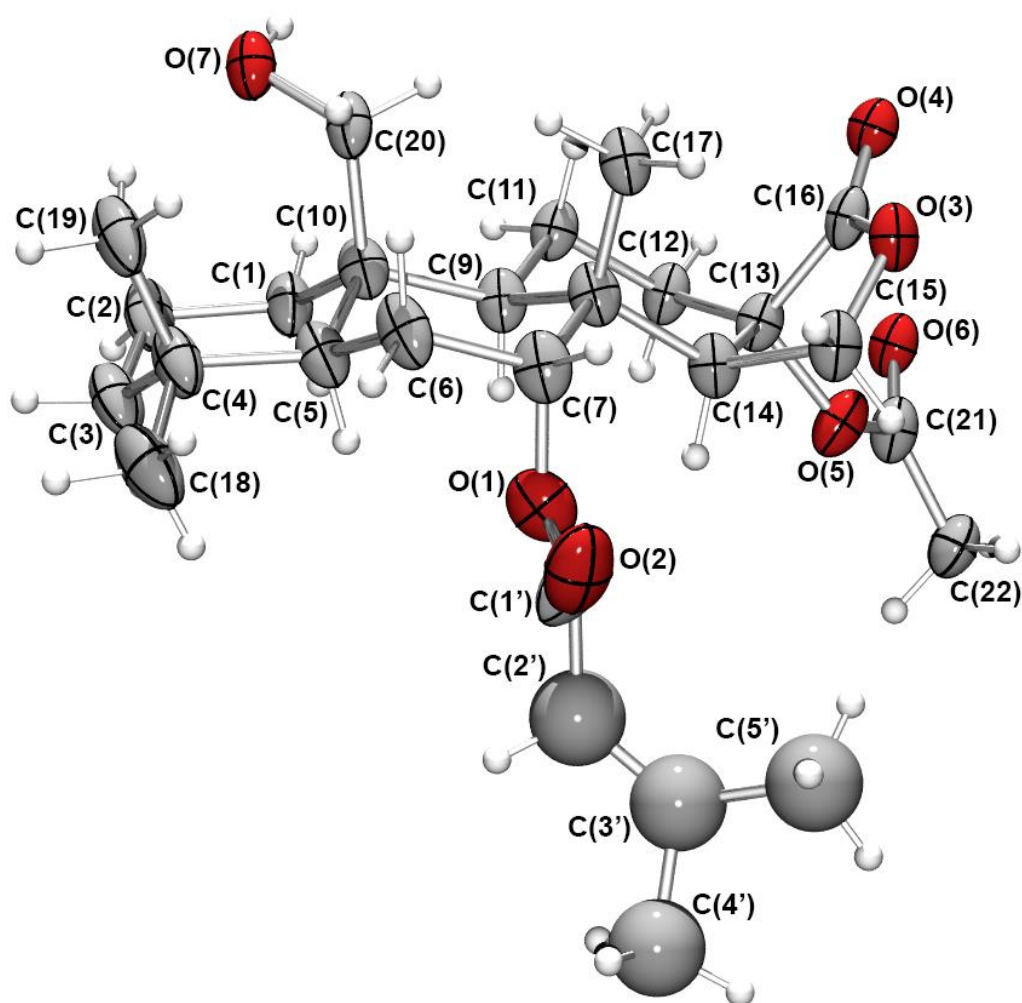

**Figure S2.** Oak Ridge Thermal Ellipsoid Plot (ORTEP) representation of the crystal structure of (-)-13-acetoxy-20-hydroxy-7 $\alpha$ -oxyspongian-16-one-7 $\alpha$ -(3-methyl)-butanoate **4** shown with only one component of each region of disorder.

## Assorted spectra

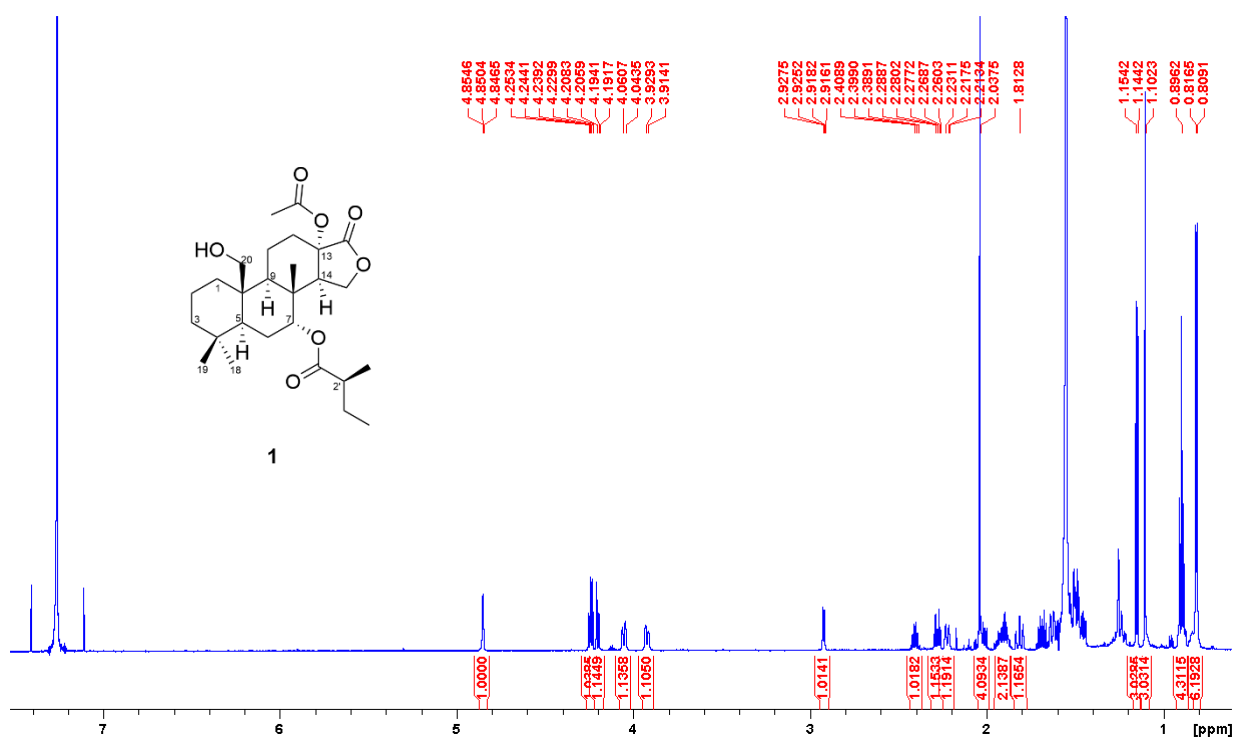

**Figure S3.**  $^1\text{H}$  NMR spectrum of **1** (700 MHz,  $\text{CDCl}_3$ ).

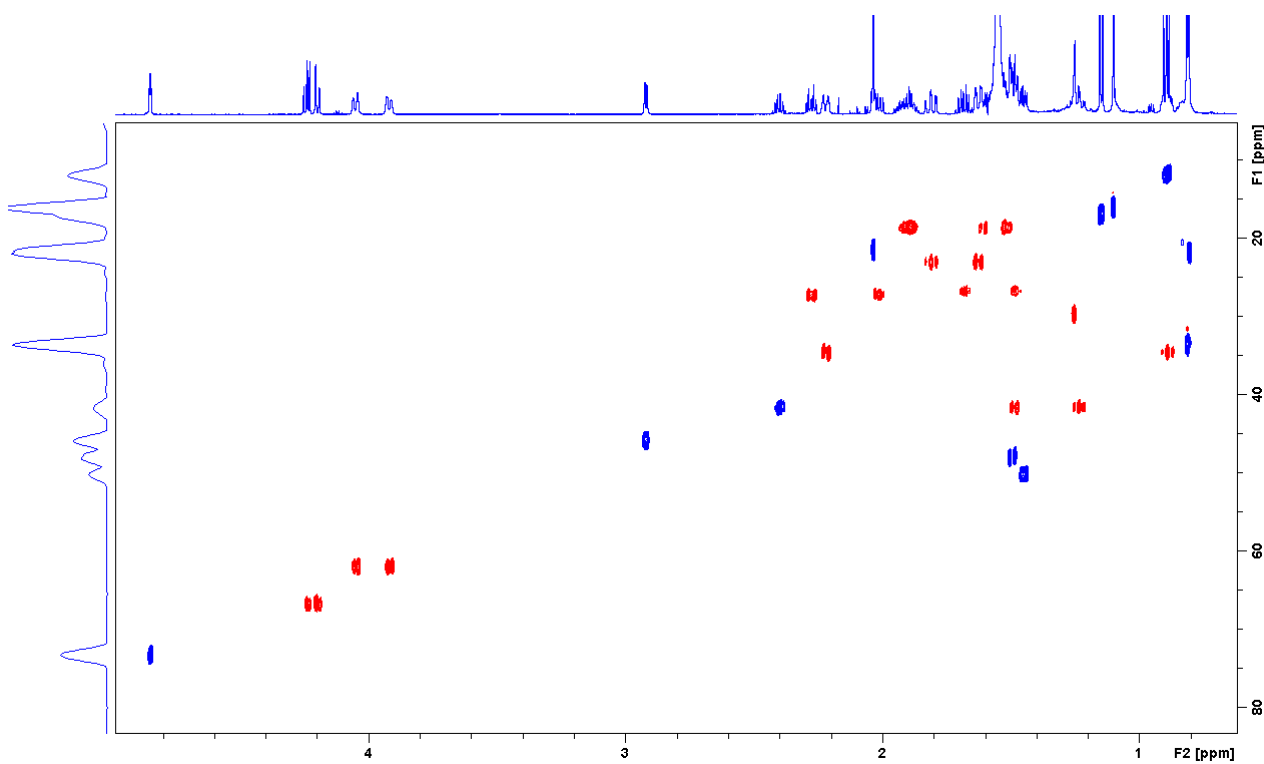

**Figure S4.** HSQC spectrum of **1** (700 MHz,  $\text{CDCl}_3$ ).

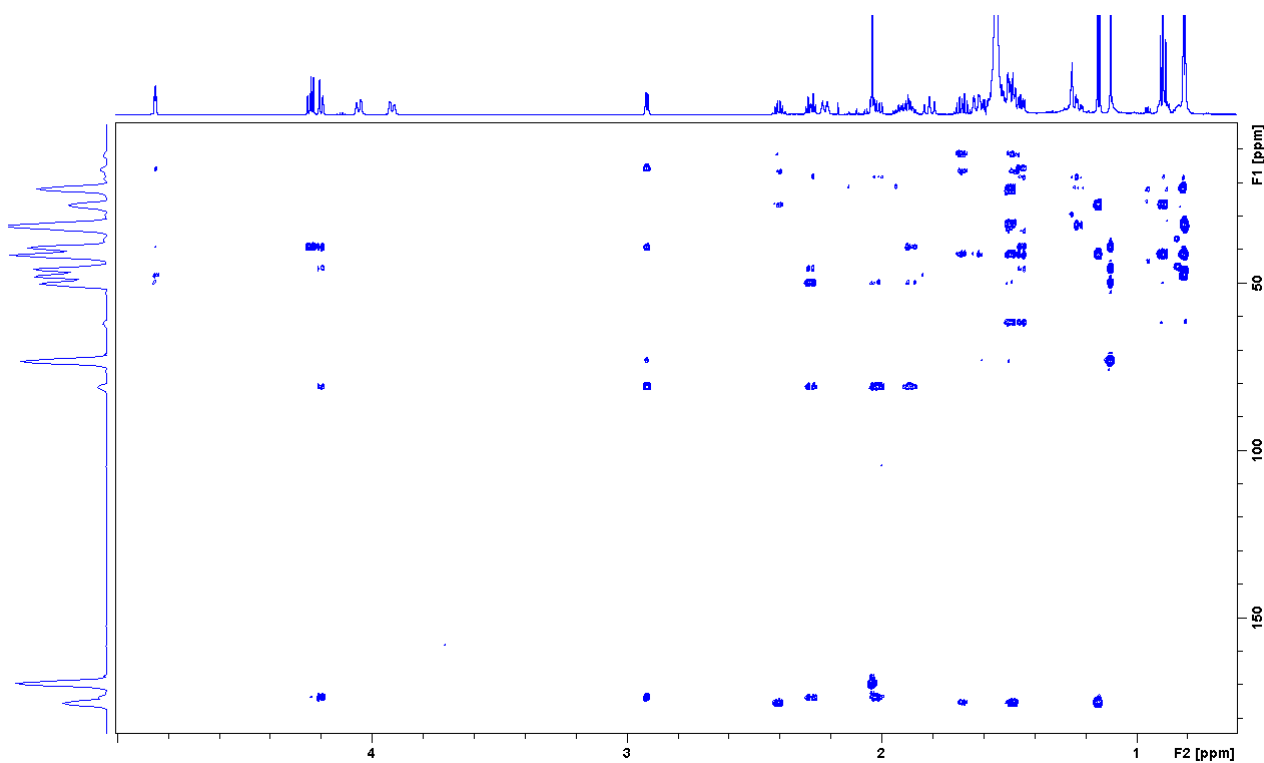

**Figure S5.** HMBC spectrum of **1** (700 MHz, CDCl<sub>3</sub>).

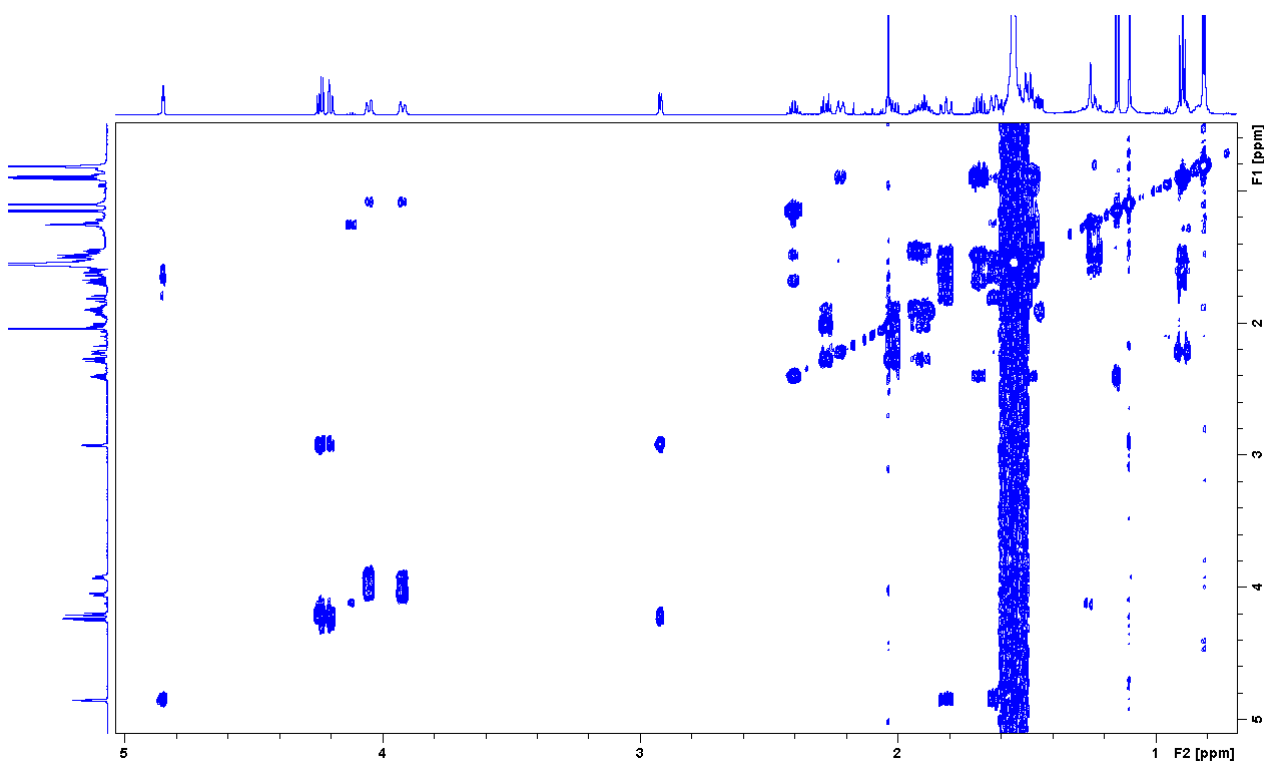

**Figure S6.** COSY spectrum of **1** (700 MHz, CDCl<sub>3</sub>).



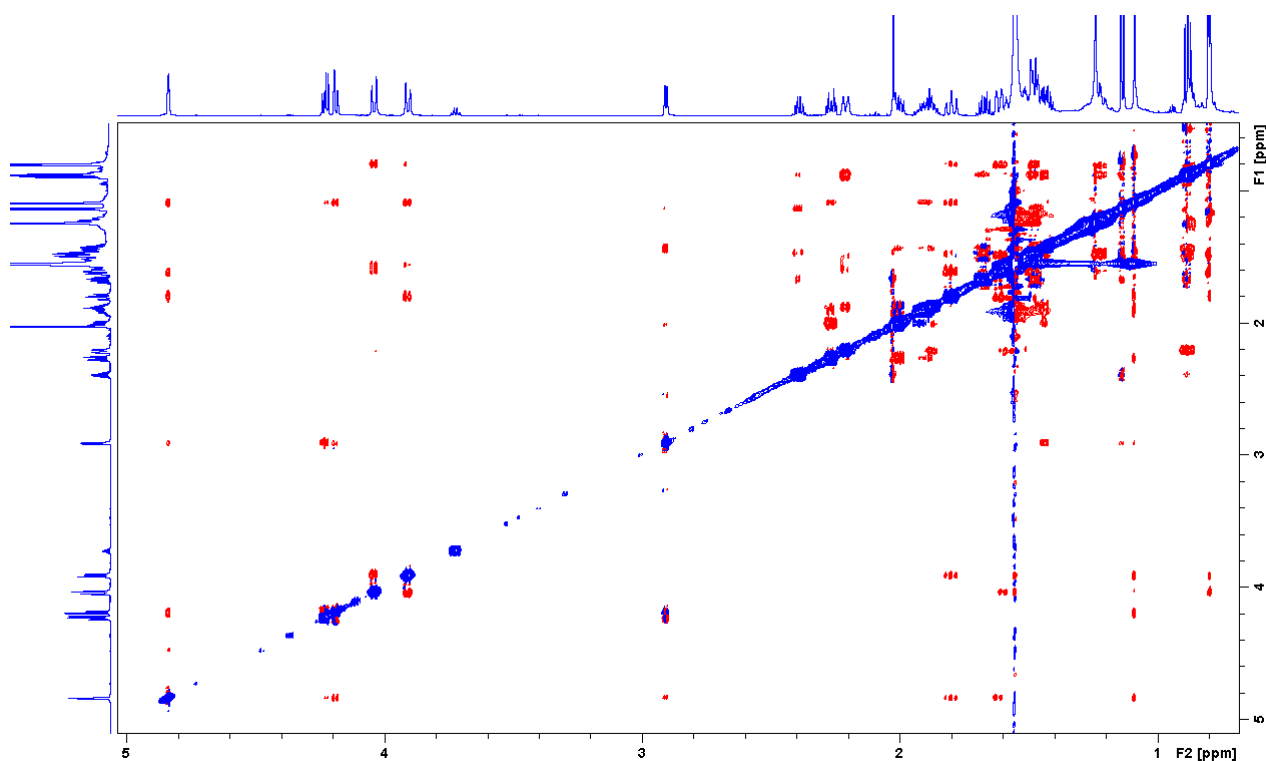

Figure S7. NOESY spectrum of **1** (700 MHz, CDCl<sub>3</sub>).

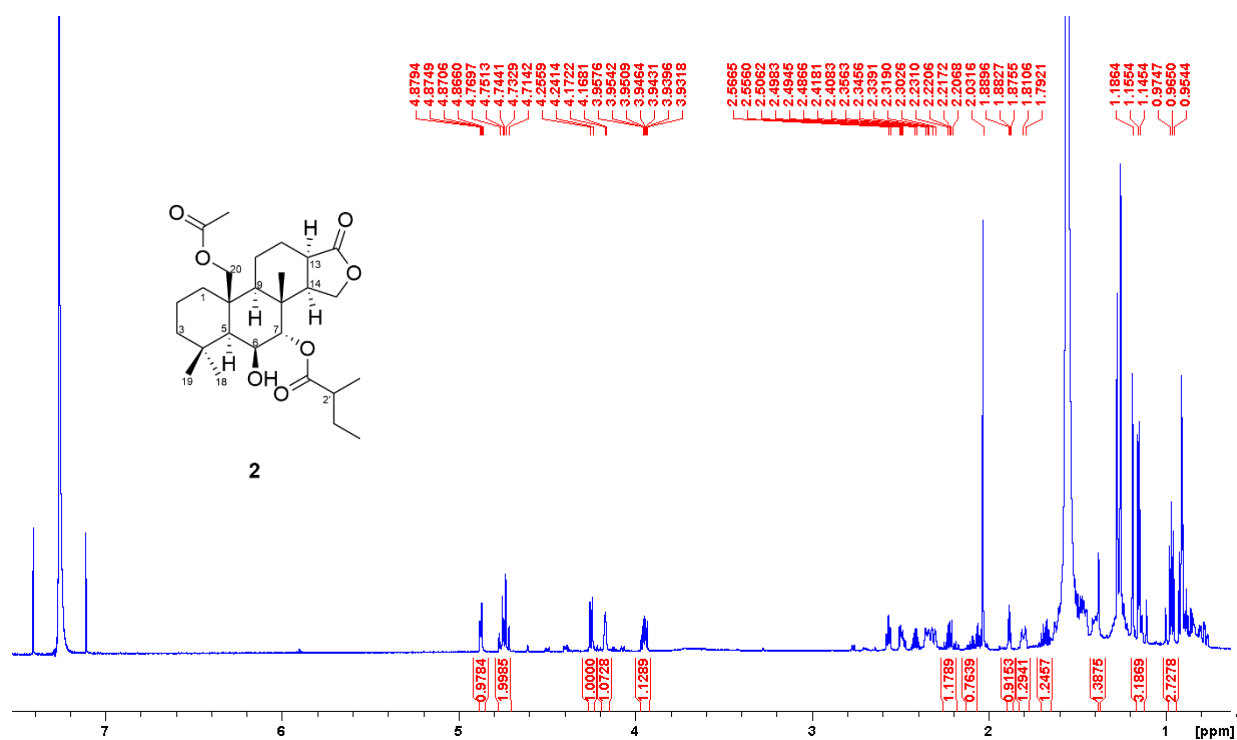

Figure S8. <sup>1</sup>H NMR spectrum of **2** (700 MHz, CDCl<sub>3</sub>).

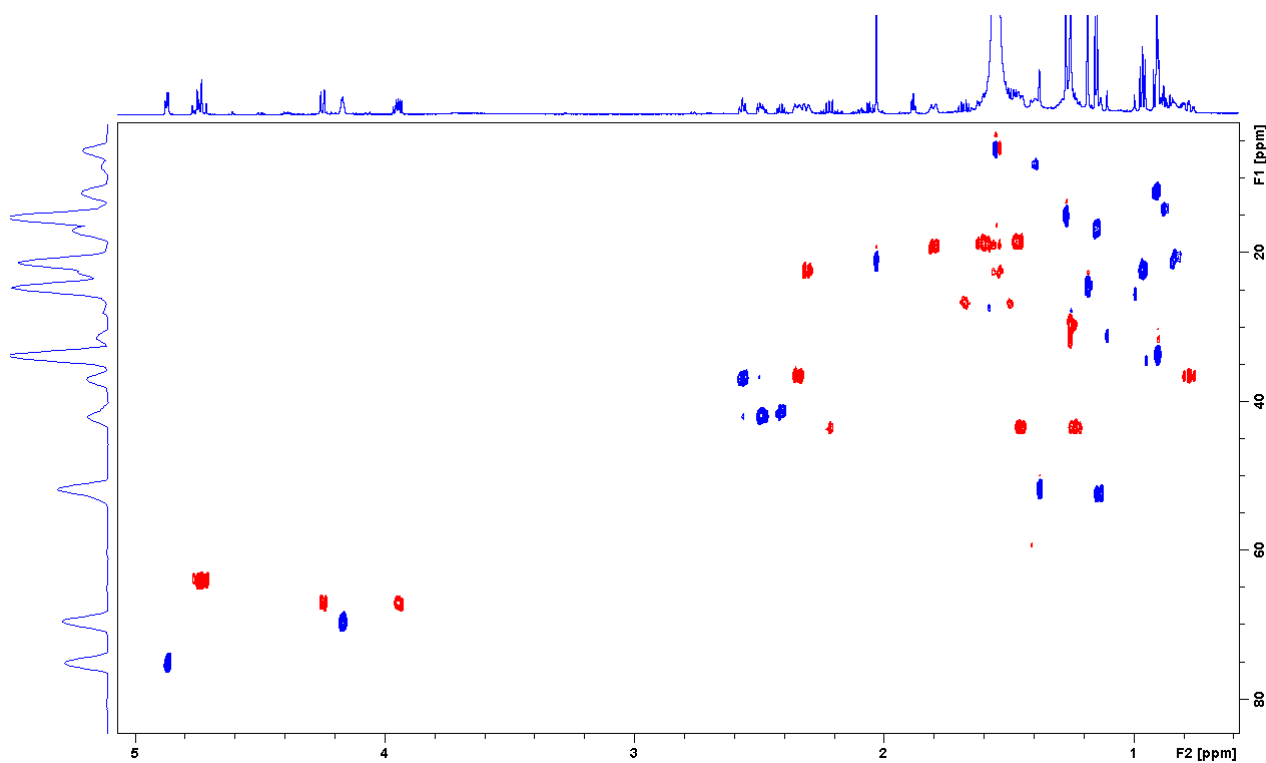

**Figure S9.** HSQC spectrum of **2** (700 MHz, CDCl<sub>3</sub>).

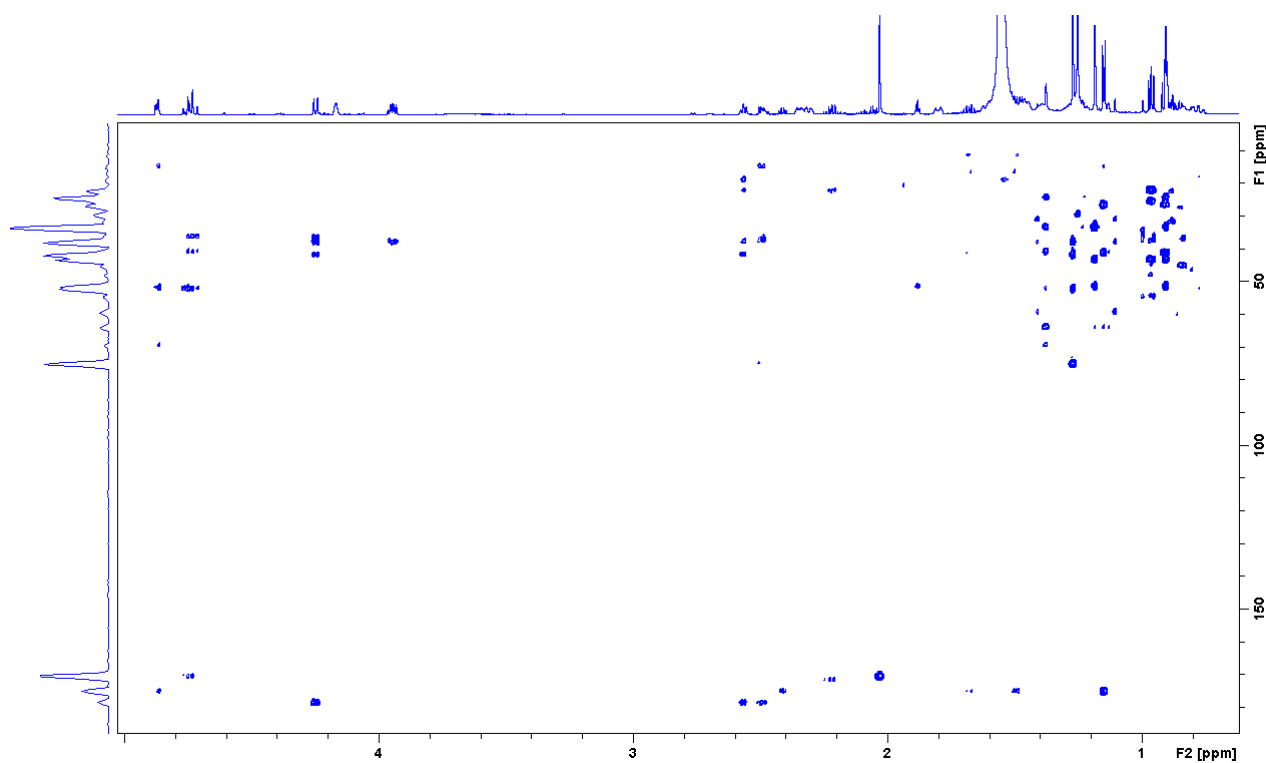

**Figure S10.** HMBC spectrum of **2** (700 MHz, CDCl<sub>3</sub>).

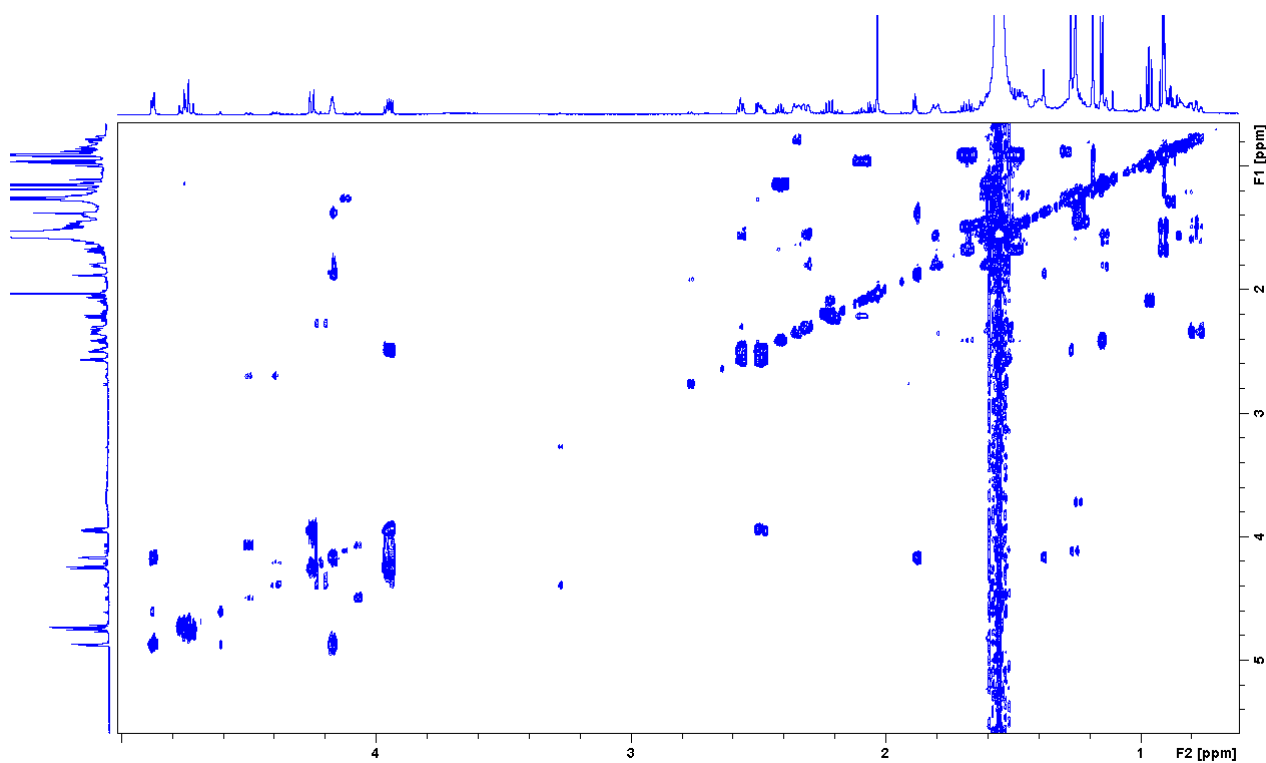

**Figure S11.** COSY spectrum of **2** (700 MHz, CDCl<sub>3</sub>).

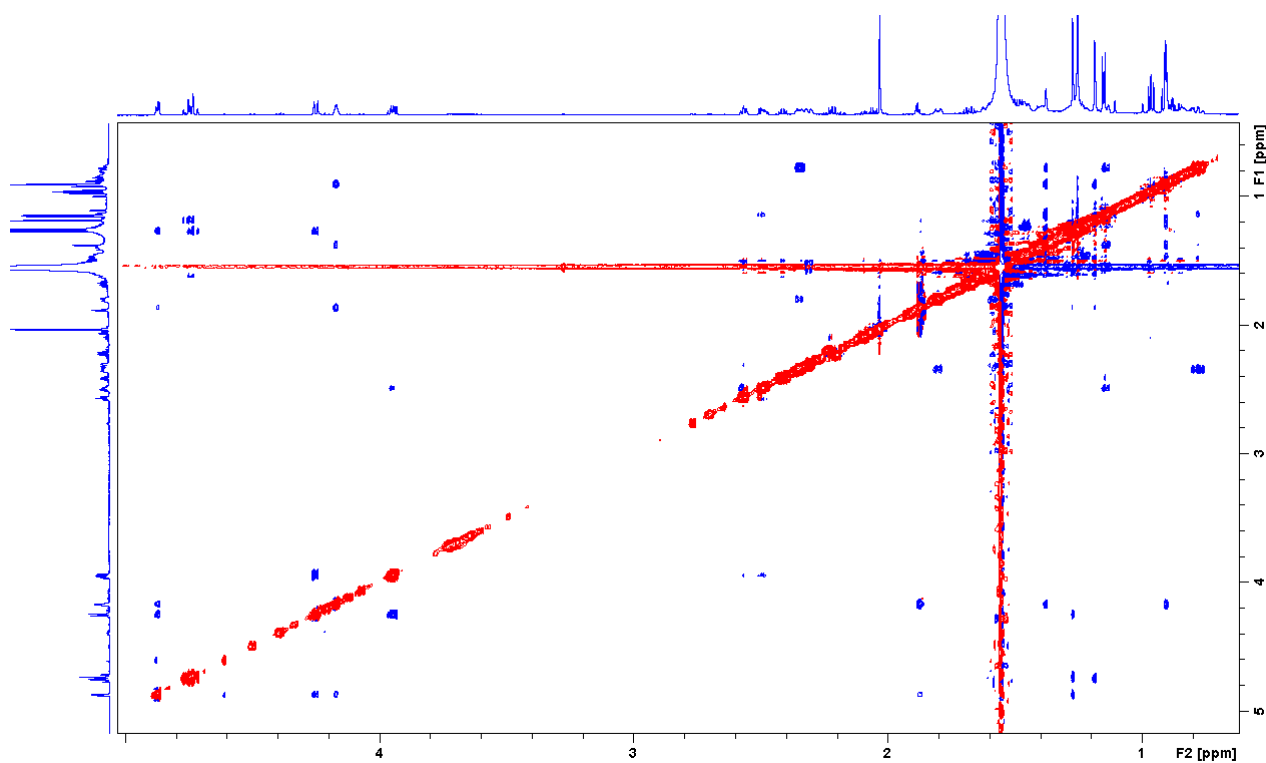

**Figure S12.** NOESY spectrum of **2** (700 MHz, CDCl<sub>3</sub>).

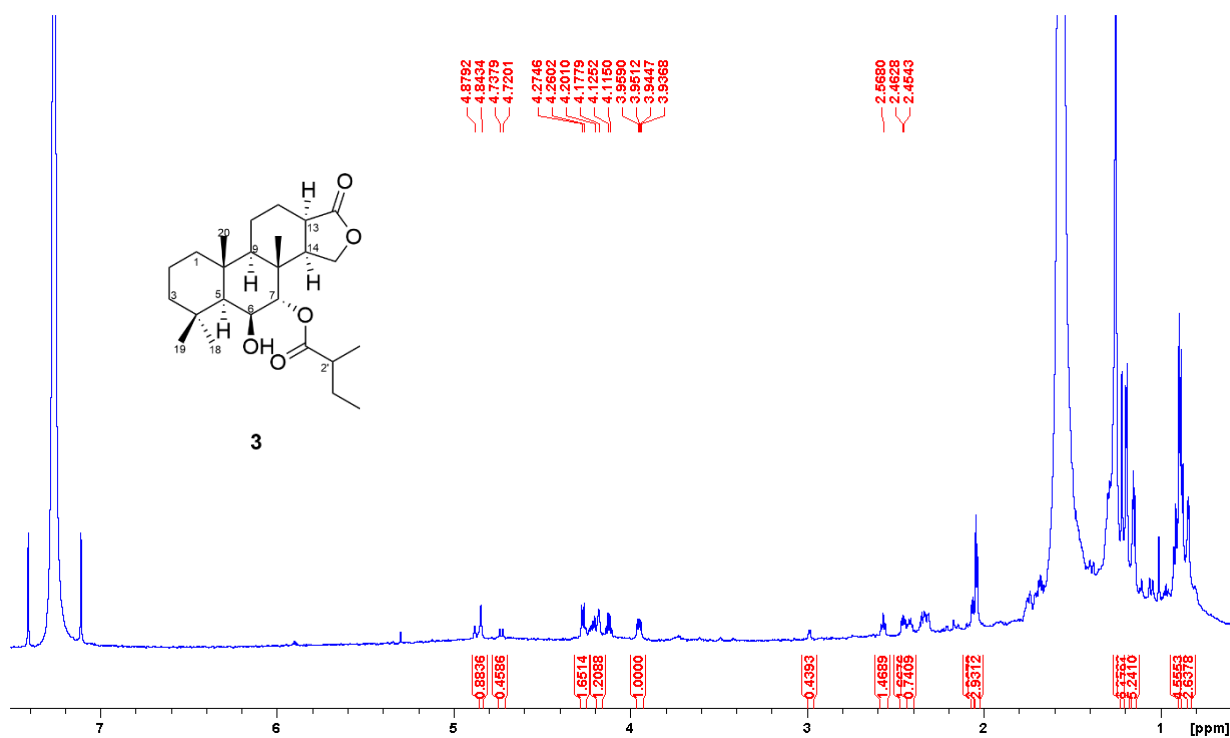

**Figure S13.** <sup>1</sup>H NMR spectrum of **3** (700 MHz, CDCl<sub>3</sub>), collected in a Shigemmi NMR tube.

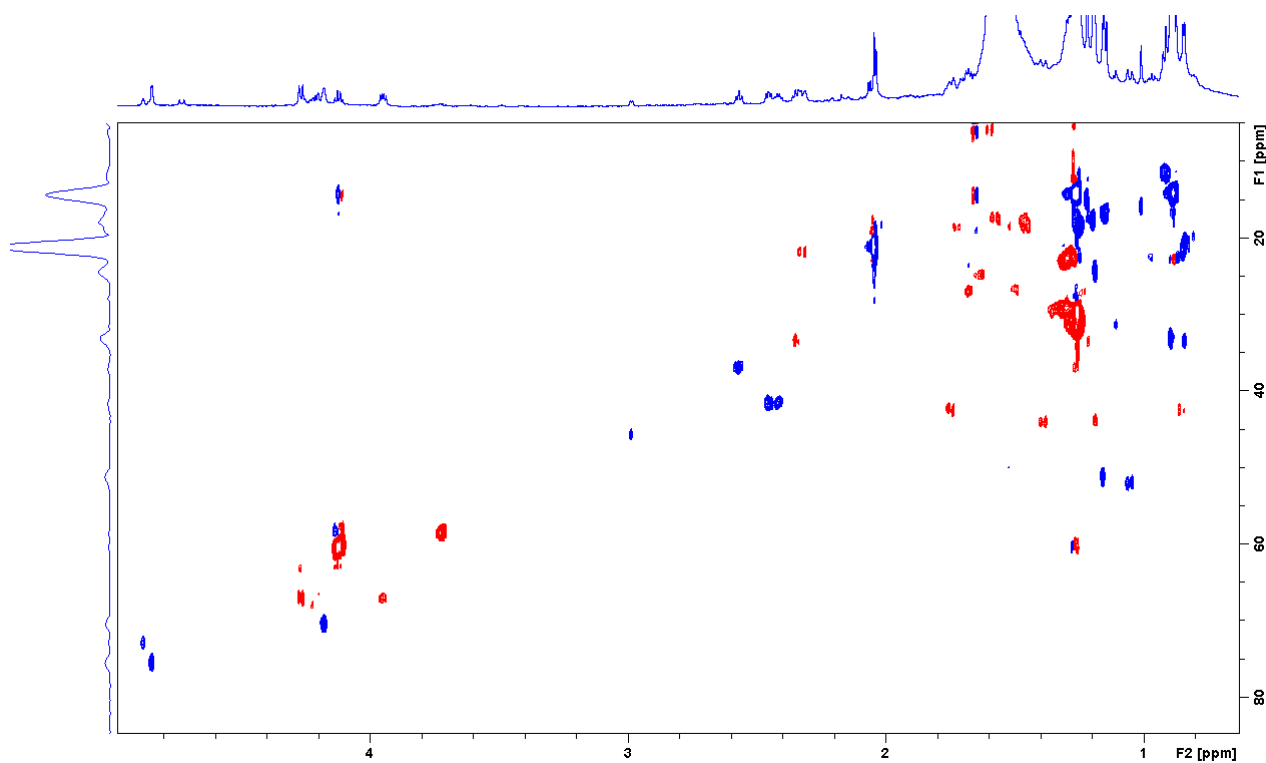

**Figure S14.** HSQC spectrum of **3** (700 MHz, CDCl<sub>3</sub>), collected in a Shigemmi NMR tube.

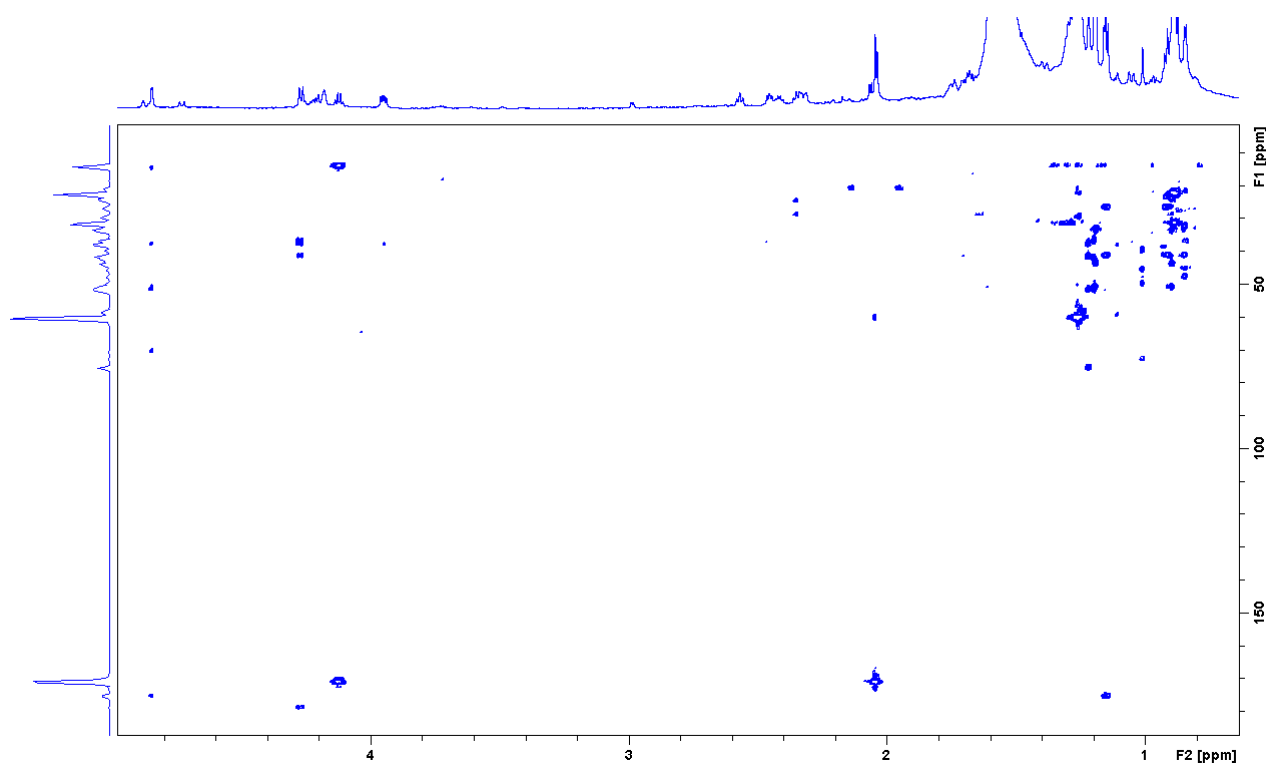

**Figure S15.** HMBC spectrum of **3** (700 MHz, CDCl<sub>3</sub>), collected in a Shigemi NMR tube.

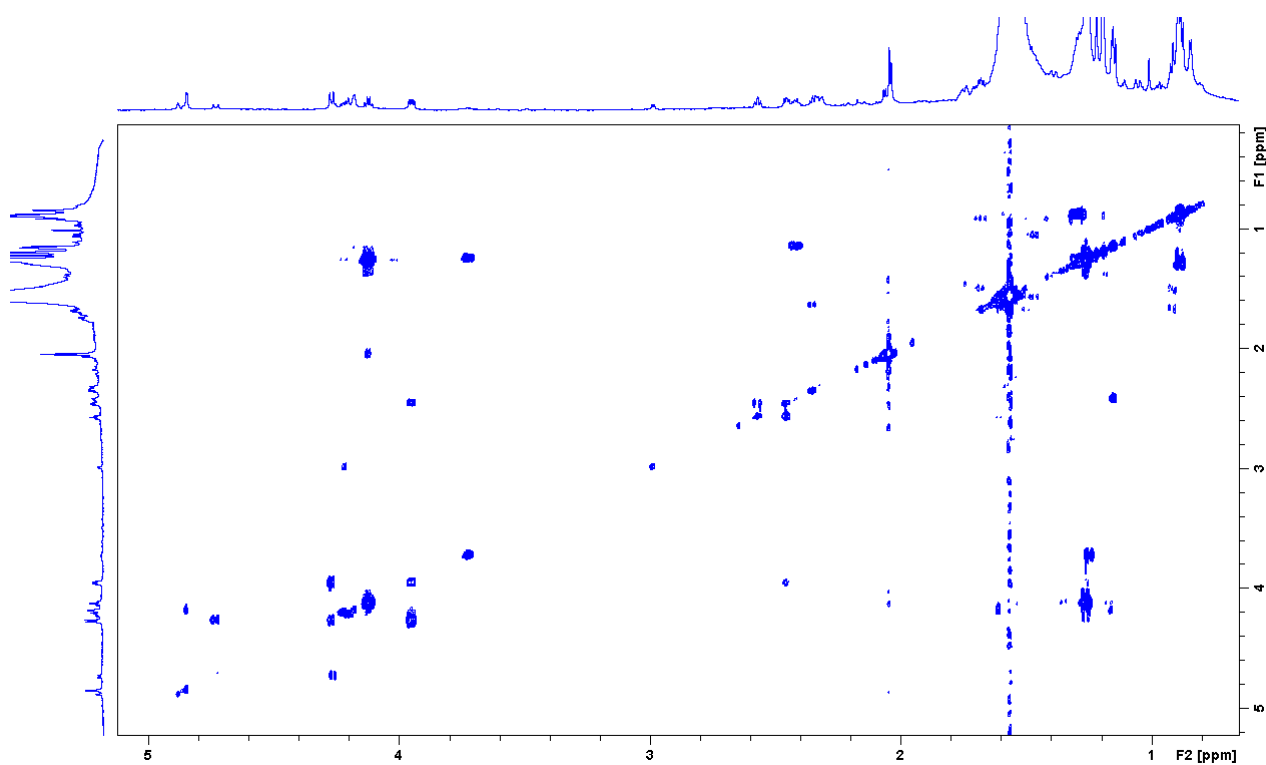

**Figure S16.** COSY spectrum of **3** (700 MHz, CDCl<sub>3</sub>), collected in a Shigemi NMR tube.

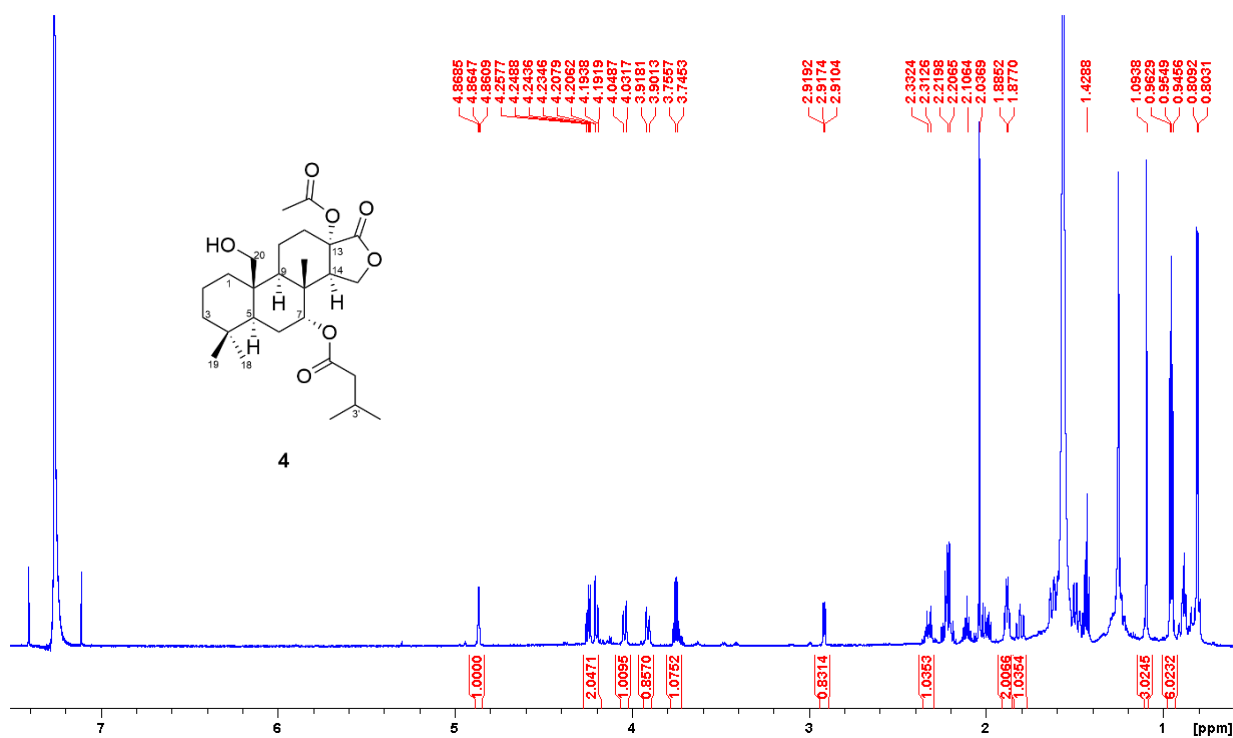

**Figure S17.**  $^1\text{H}$  NMR spectrum of **4** (700 MHz,  $\text{CDCl}_3$ ).

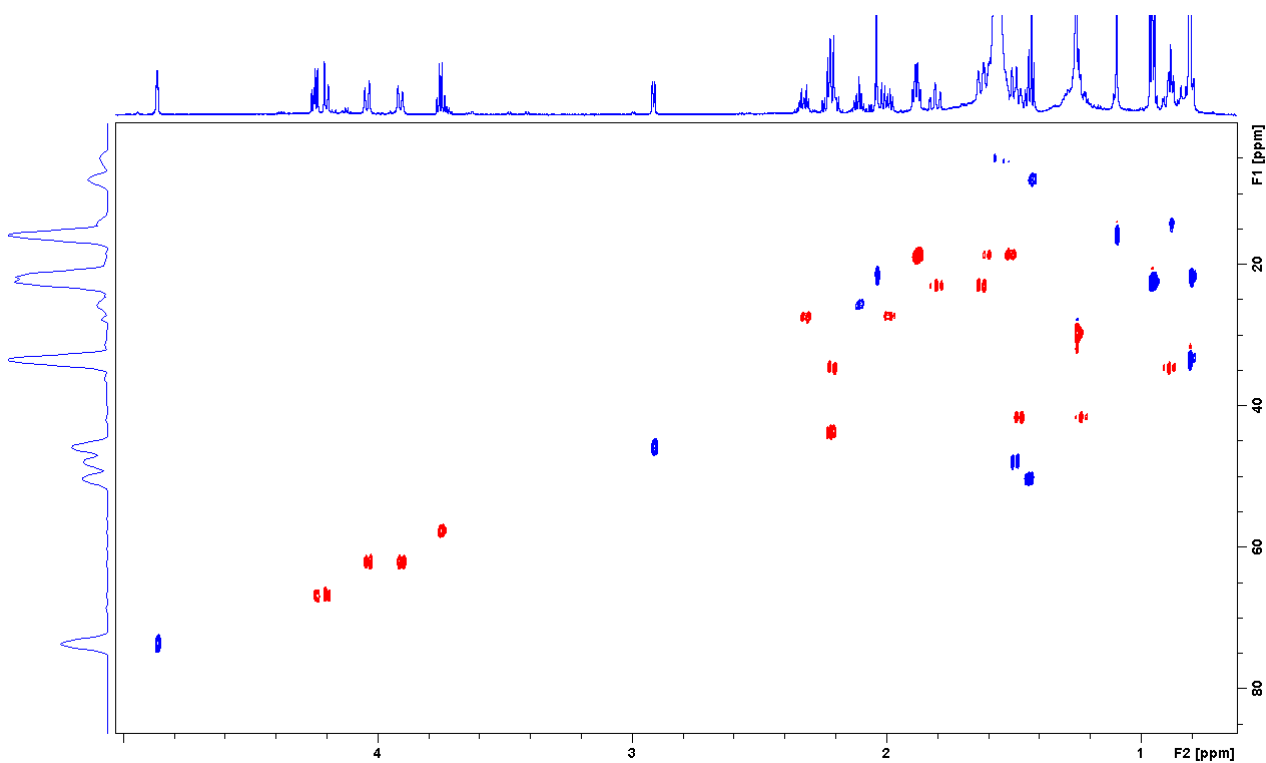

**Figure S18.** HSQC spectrum of **4** (700 MHz,  $\text{CDCl}_3$ ).

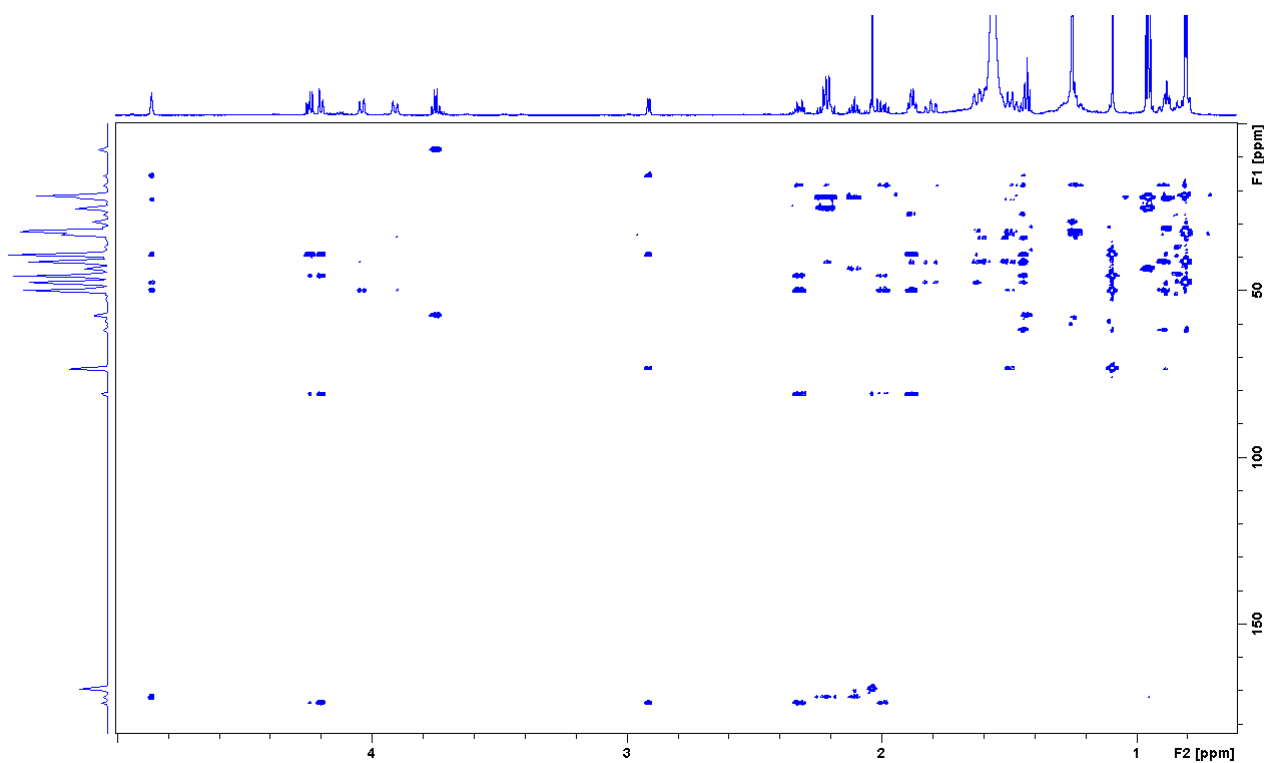

**Figure S19.** HMBC spectrum of **4** (700 MHz, CDCl<sub>3</sub>).

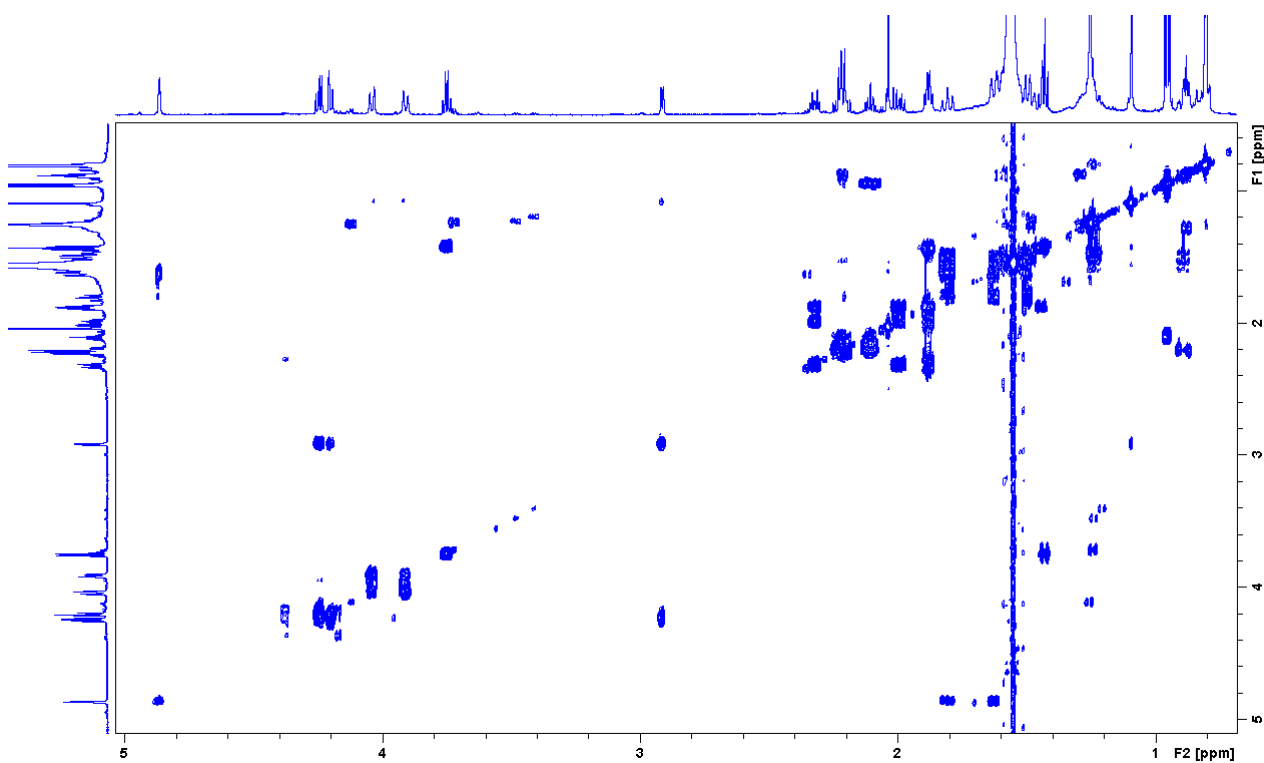

**Figure S20.** COSY spectrum of **4** (700 MHz, CDCl<sub>3</sub>).

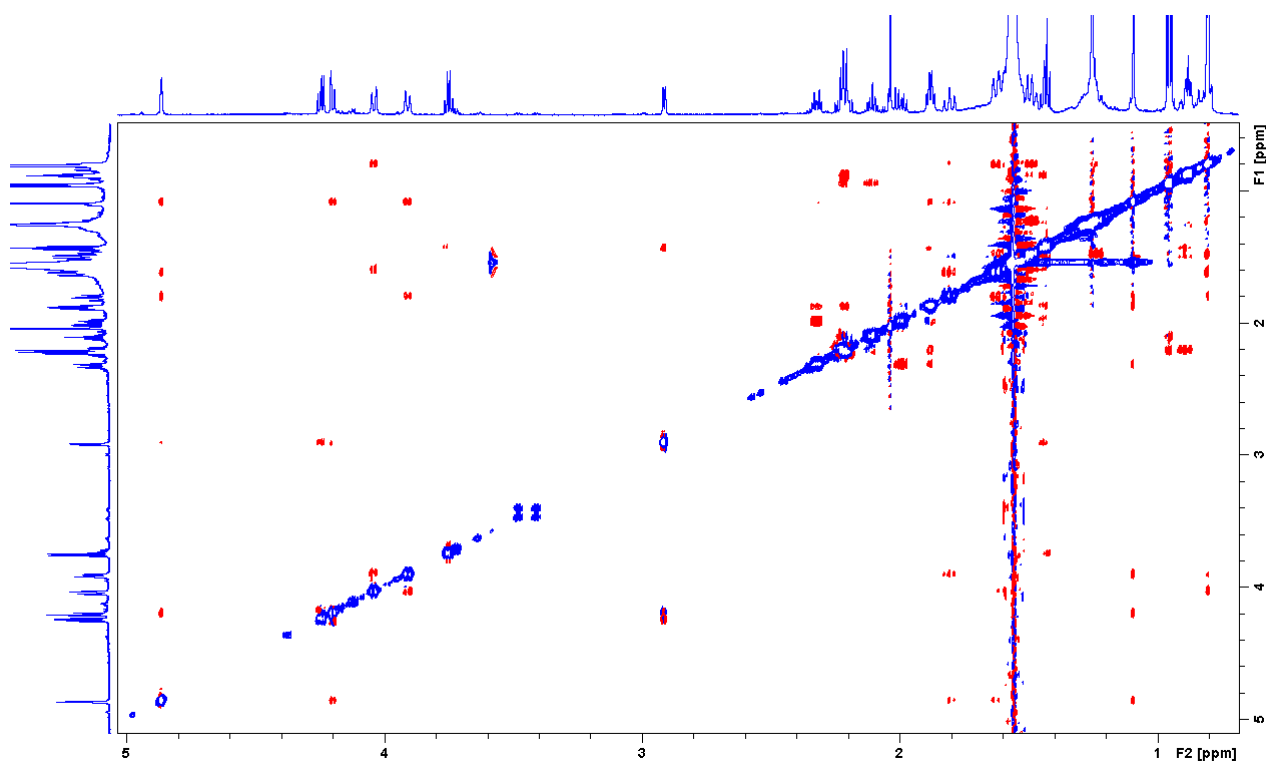

**Figure S21.** NOESY spectrum of **4** (700 MHz, CDCl<sub>3</sub>).

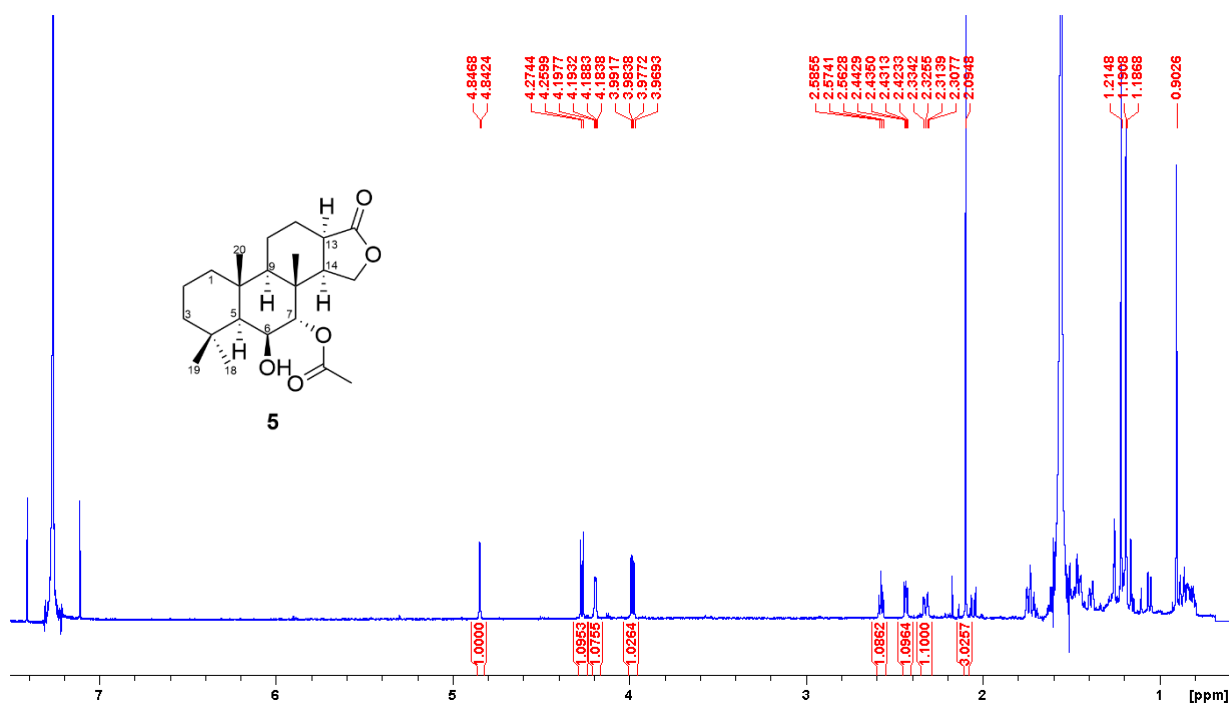

**Figure S22.** <sup>1</sup>H NMR spectrum of **5** (700 MHz, CDCl<sub>3</sub>).



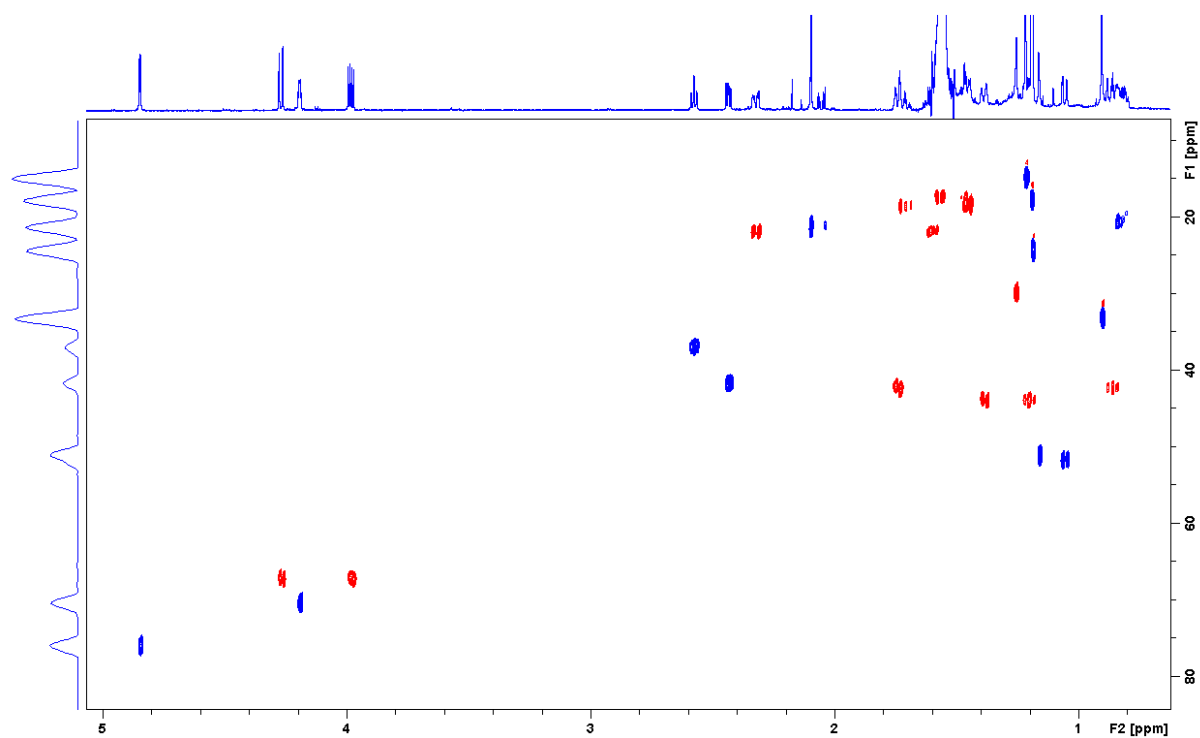

**Figure S23.** HSQC spectrum of **5** (700 MHz,  $\text{CDCl}_3$ ).

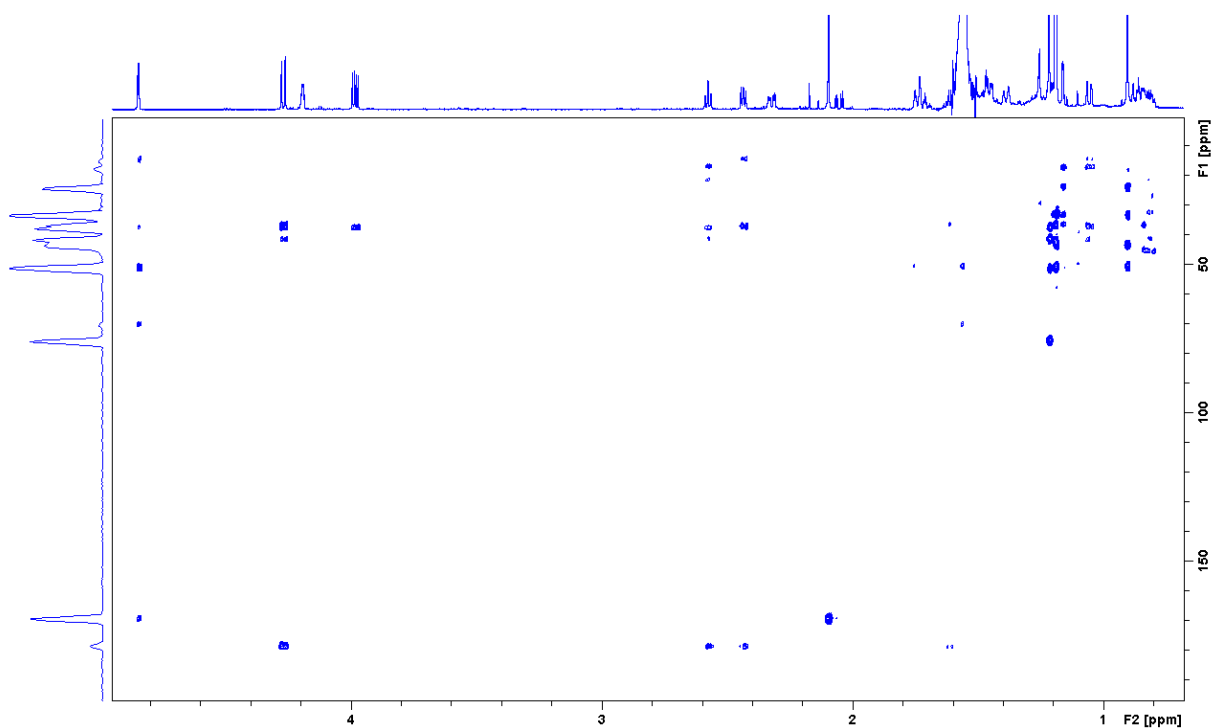

**Figure S24.** HMBC spectrum of **5** (700 MHz,  $\text{CDCl}_3$ ).

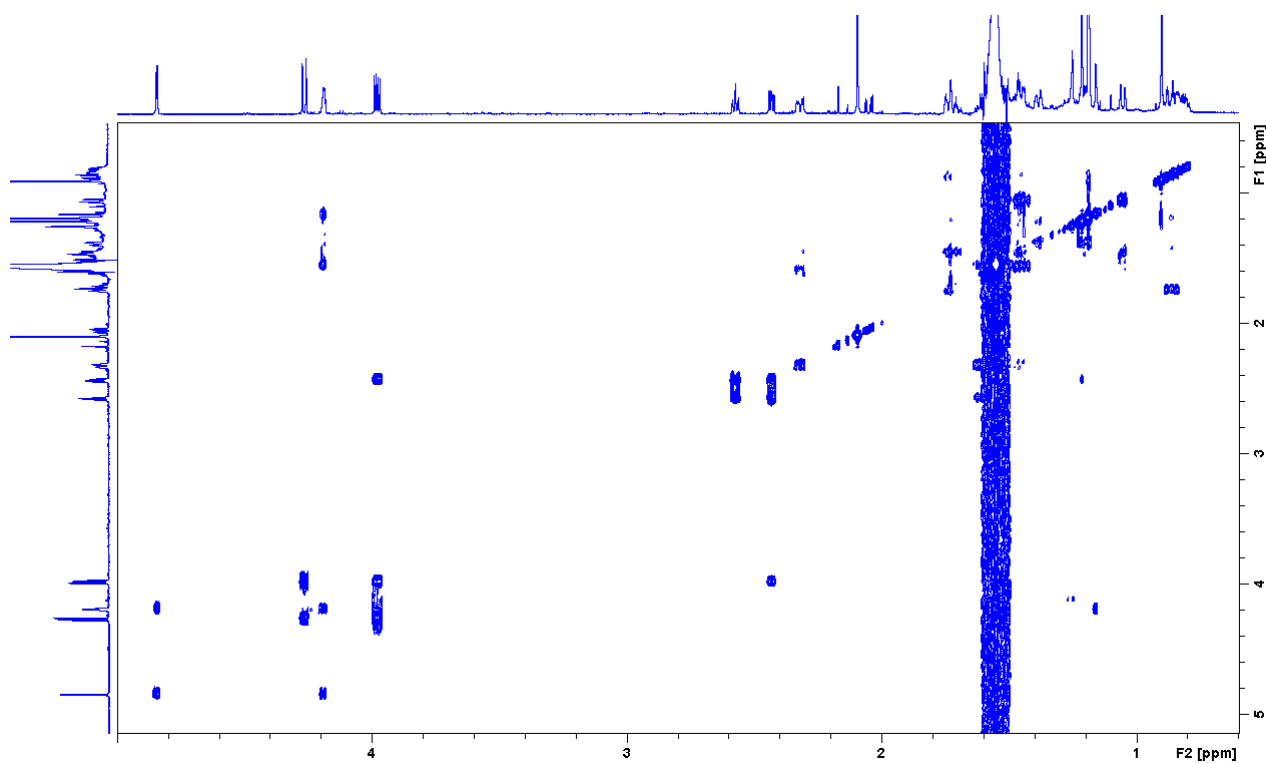

**Figure S25.** COSY spectrum of **5** (700 MHz, CDCl<sub>3</sub>).

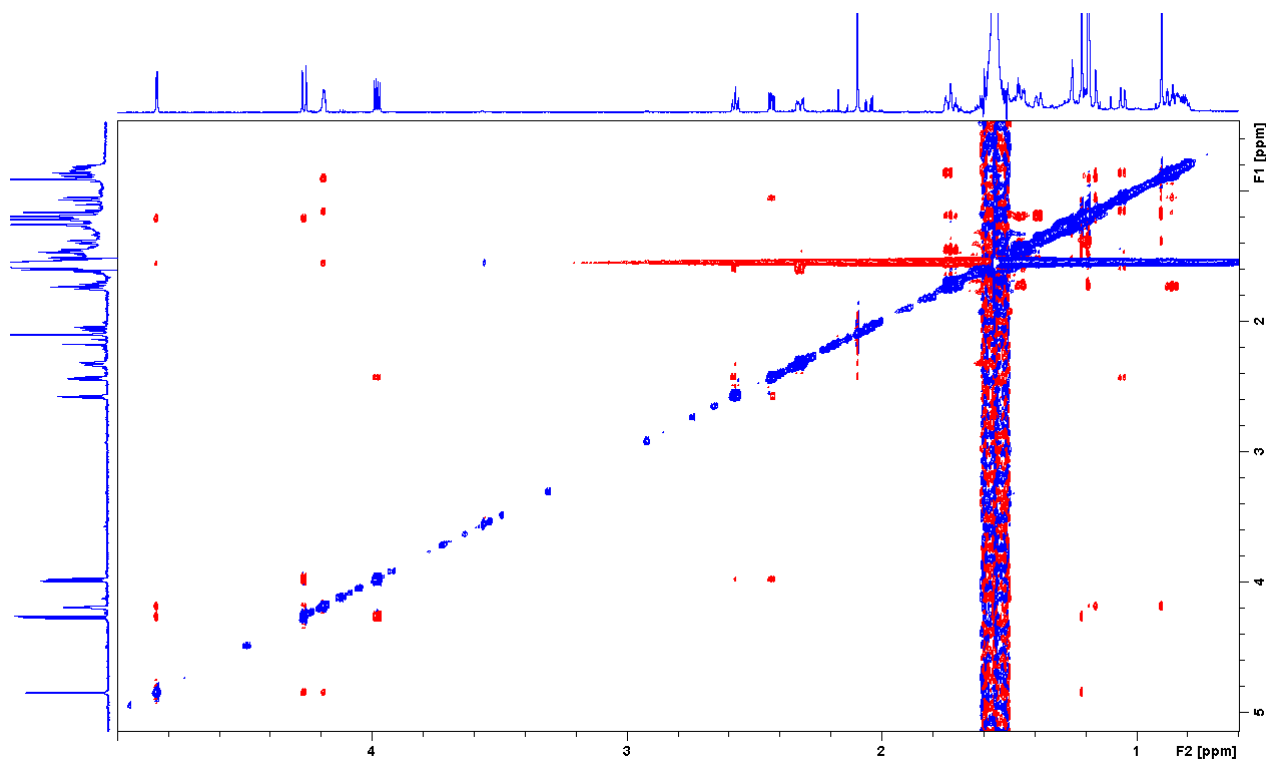

**Figure S26.** NOESY spectrum of **5** (700 MHz, CDCl<sub>3</sub>).

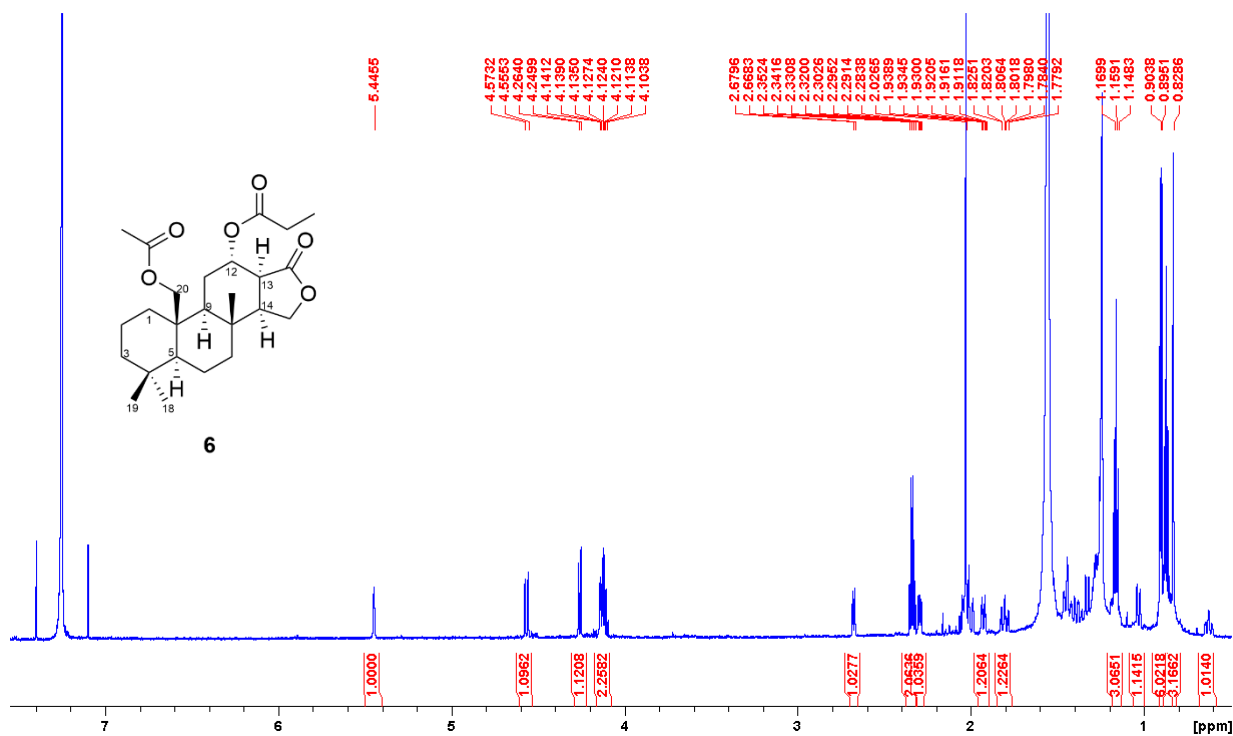

**Figure S27.**  $^1\text{H}$  NMR spectrum of **6** (700 MHz,  $\text{CDCl}_3$ ).

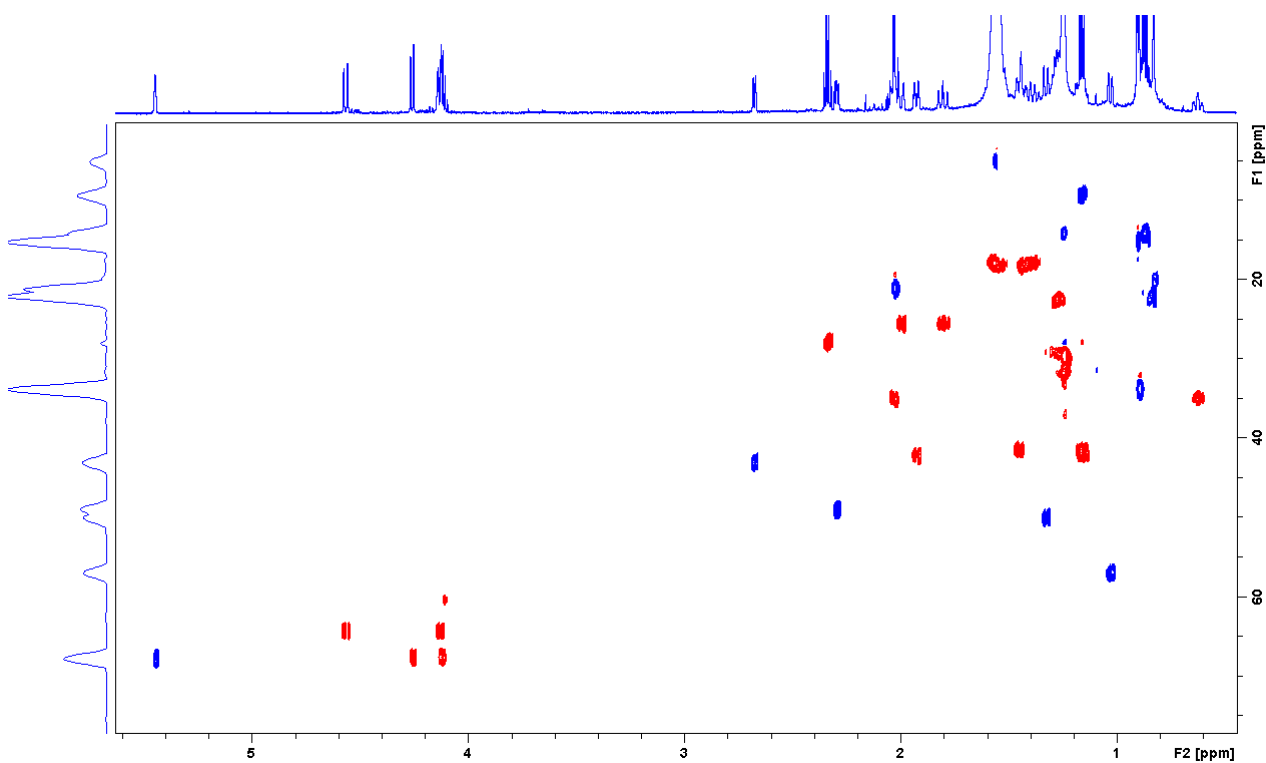

**Figure S28.** HSQC spectrum of **6** (700 MHz,  $\text{CDCl}_3$ ).

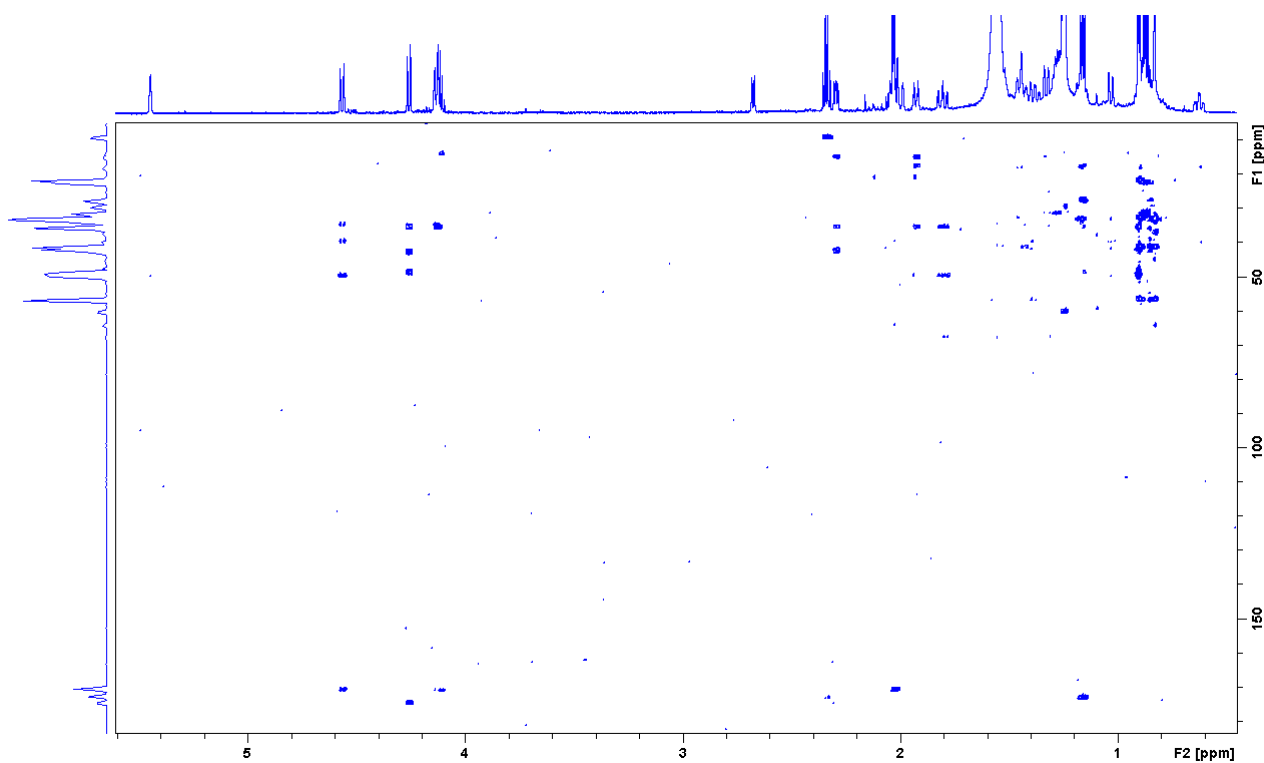

**Figure S29.** HMBC spectrum of **6** (700 MHz, CDCl<sub>3</sub>).

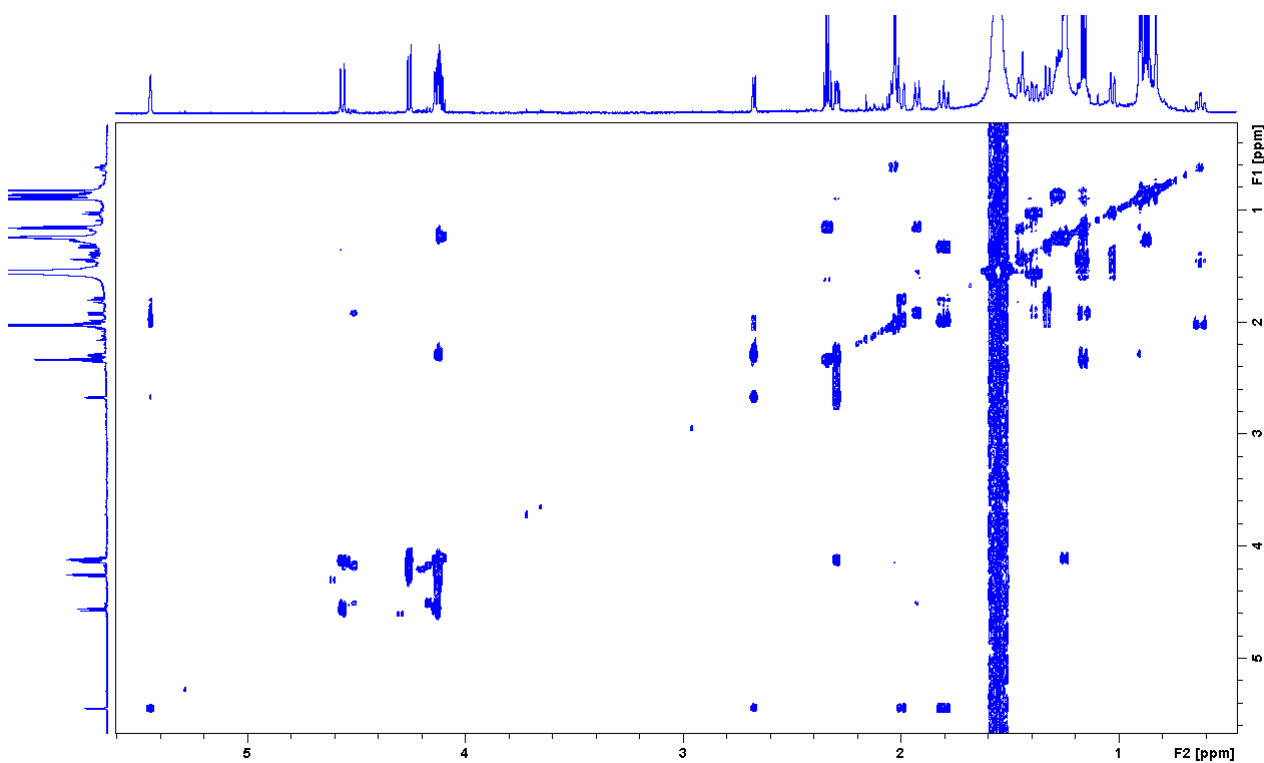

**Figure S30.** COSY spectrum of **6** (700 MHz, CDCl<sub>3</sub>).

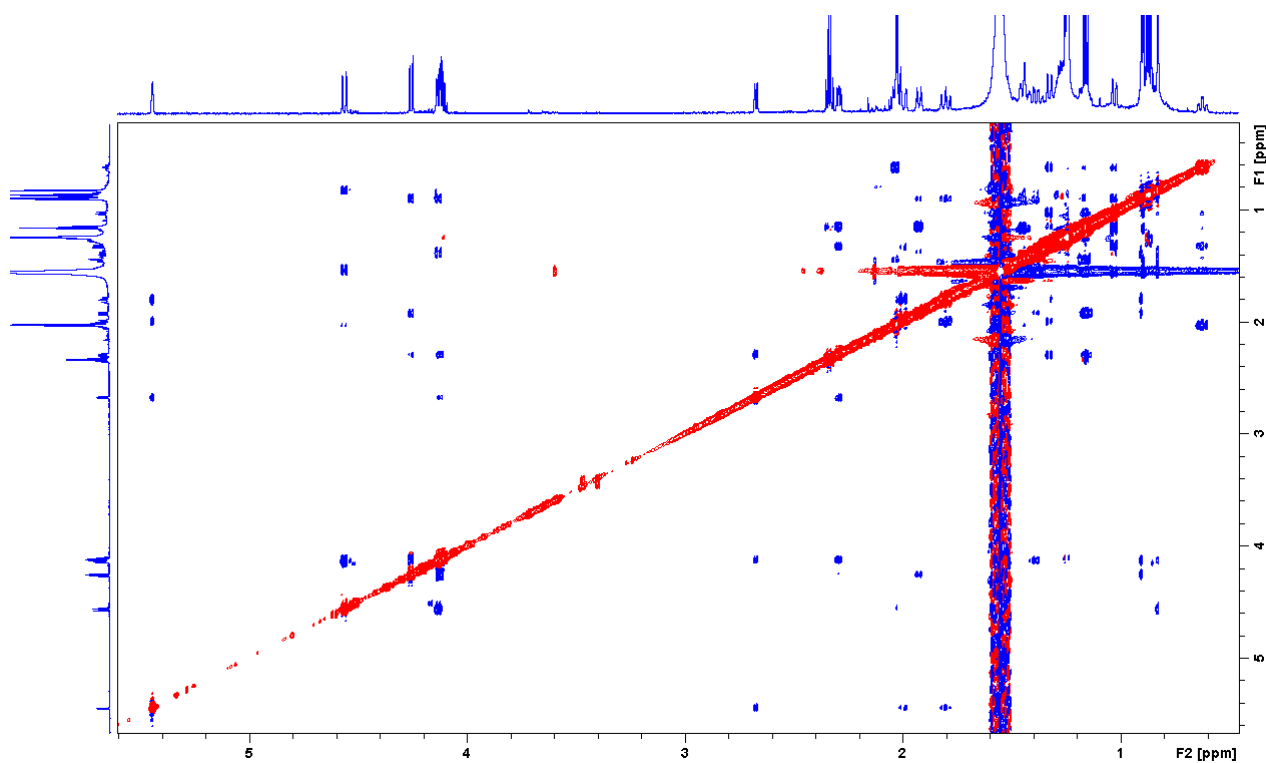

**Figure S31.** NOESY spectrum of **6** (700 MHz, CDCl<sub>3</sub>).

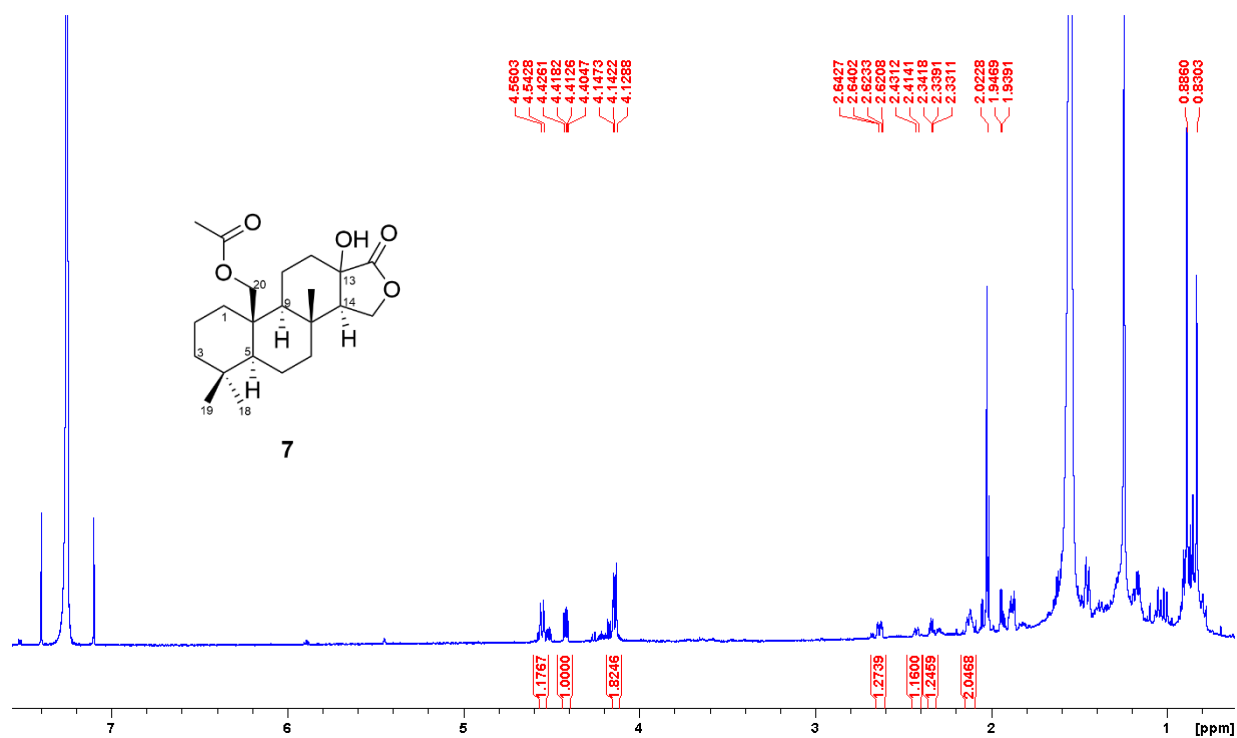

**Figure S32.** <sup>1</sup>H NMR spectrum of **7** (700 MHz, CDCl<sub>3</sub>).

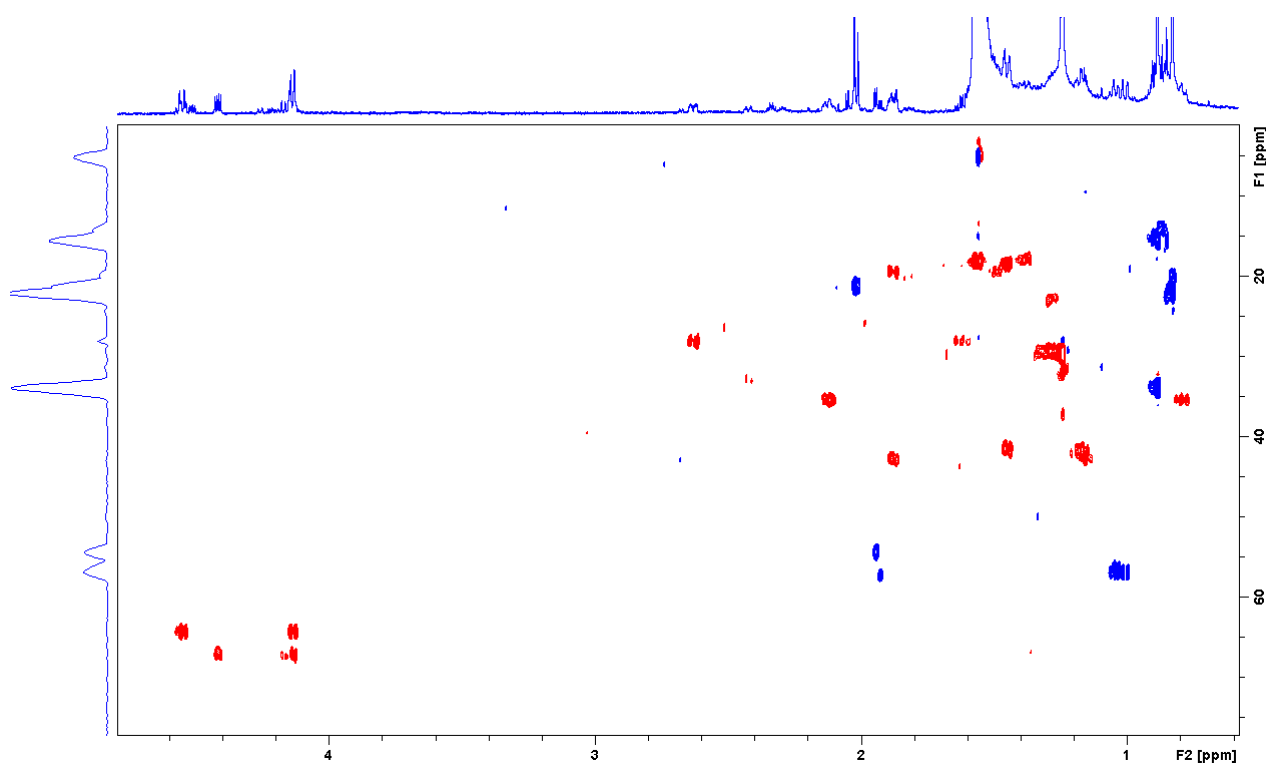

**Figure S33.** HSQC spectrum of **7** (700 MHz,  $\text{CDCl}_3$ ).

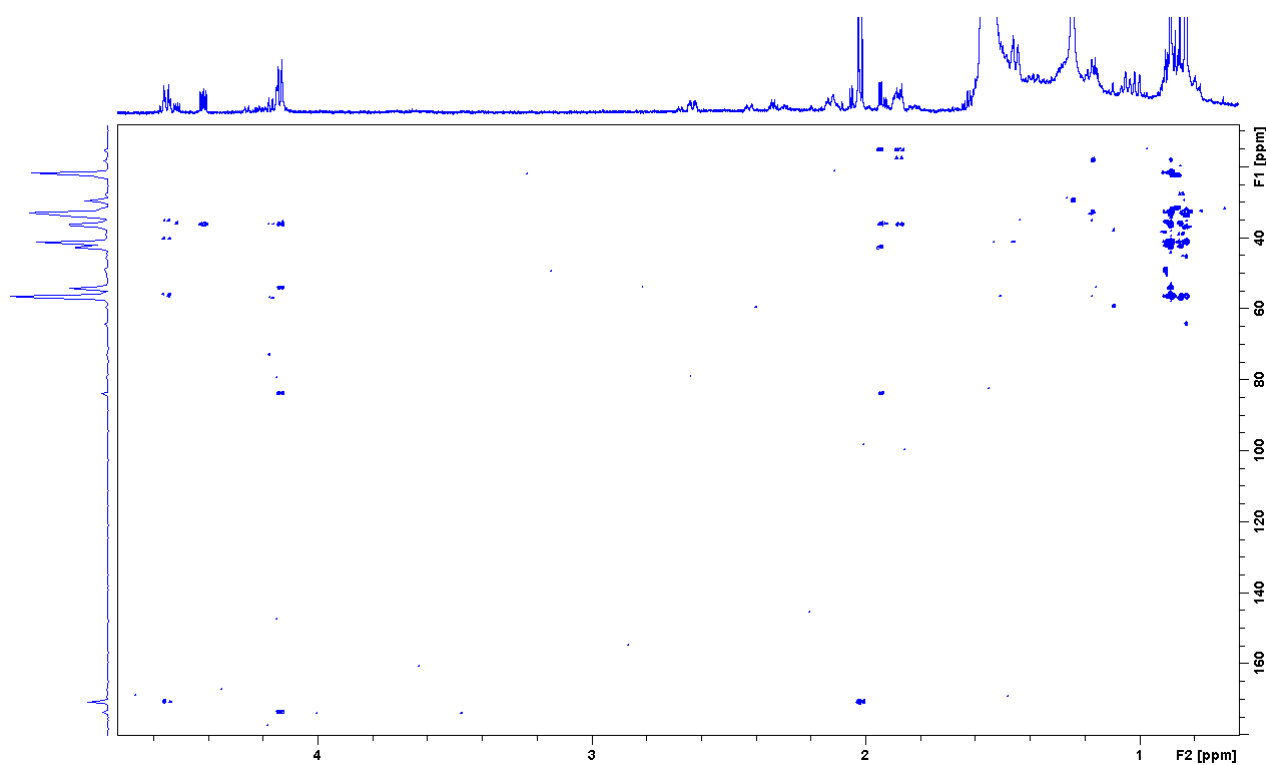

**Figure S34.** HMBC spectrum of **7** (700 MHz,  $\text{CDCl}_3$ ).

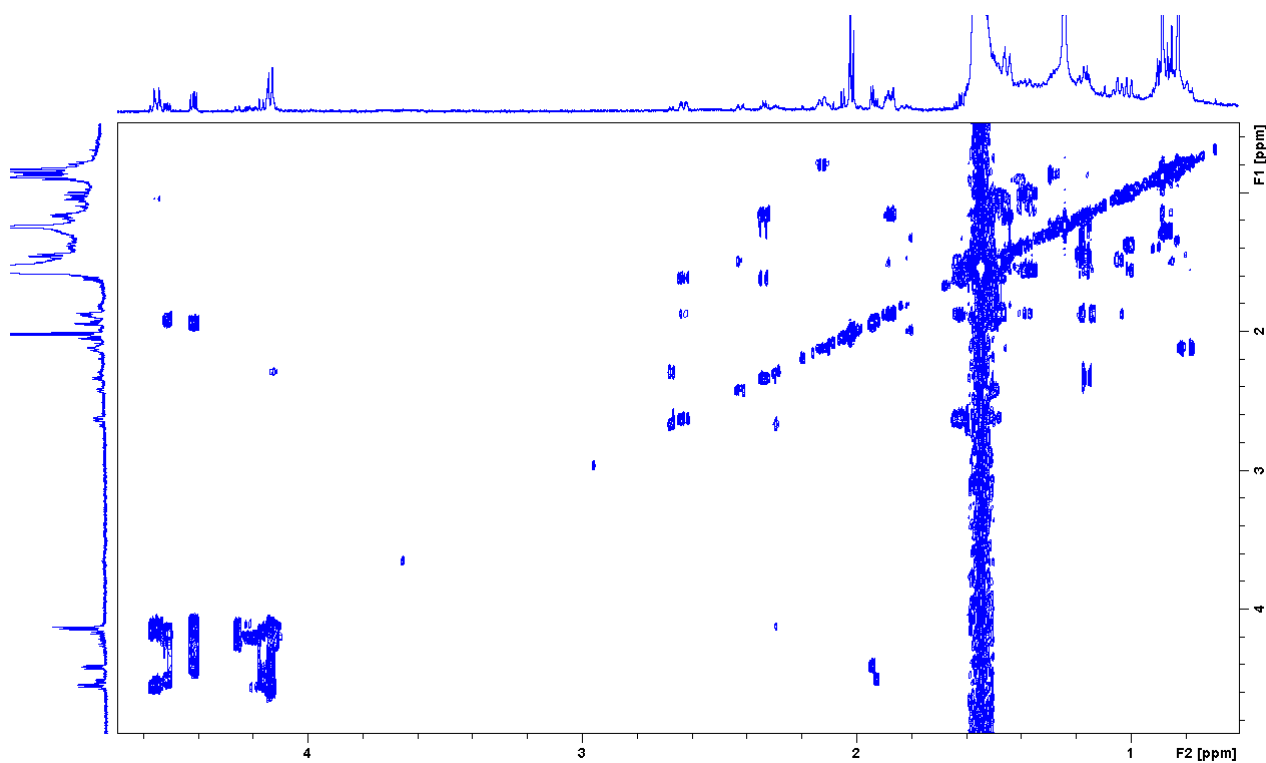

**Figure S35.** COSY spectrum of **7** (700 MHz,  $\text{CDCl}_3$ ).

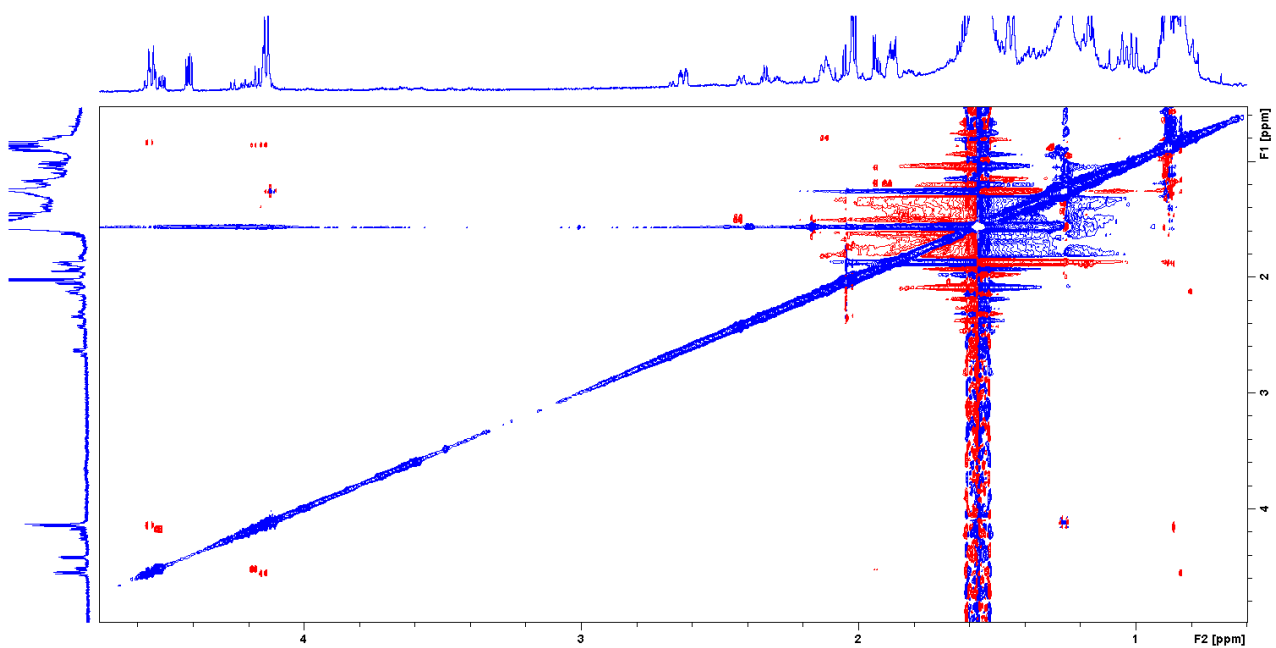

**Figure S36.** NOSEY spectrum of **7** (700 MHz,  $\text{CDCl}_3$ ).

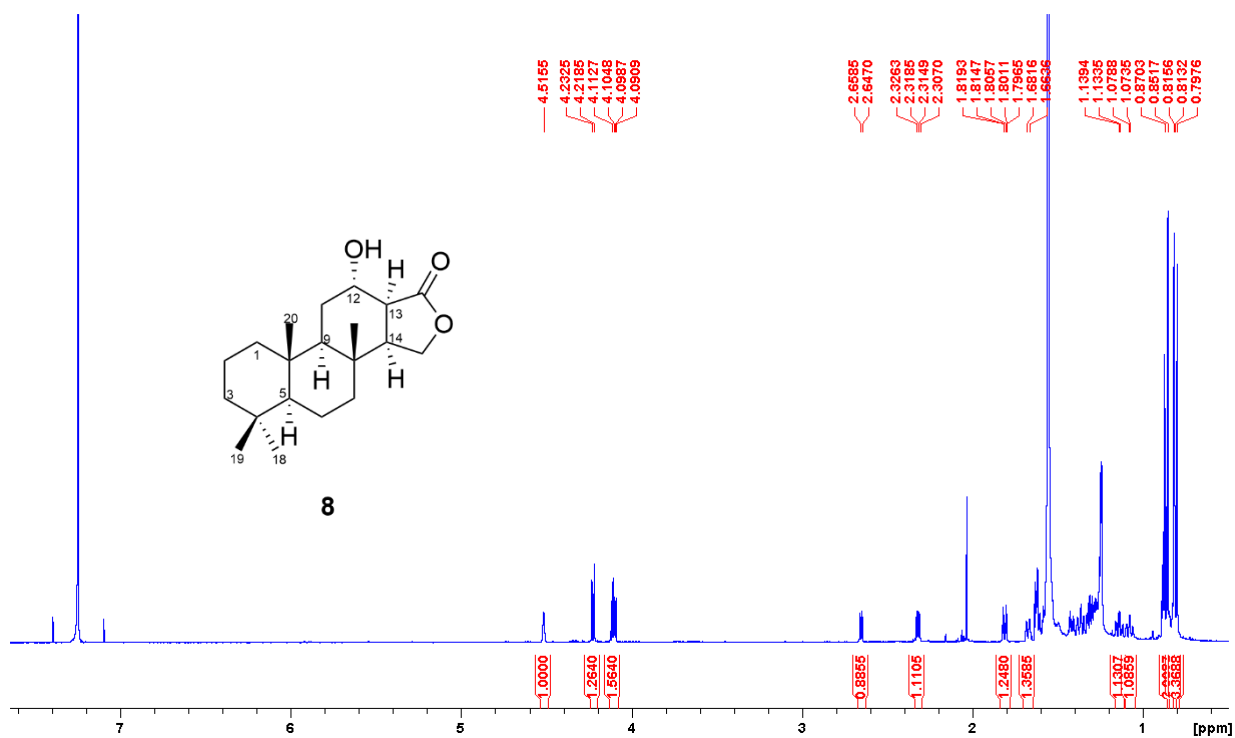

**Figure S37.**  $^1\text{H}$  NMR spectrum of **8** (700 MHz,  $\text{CDCl}_3$ ).

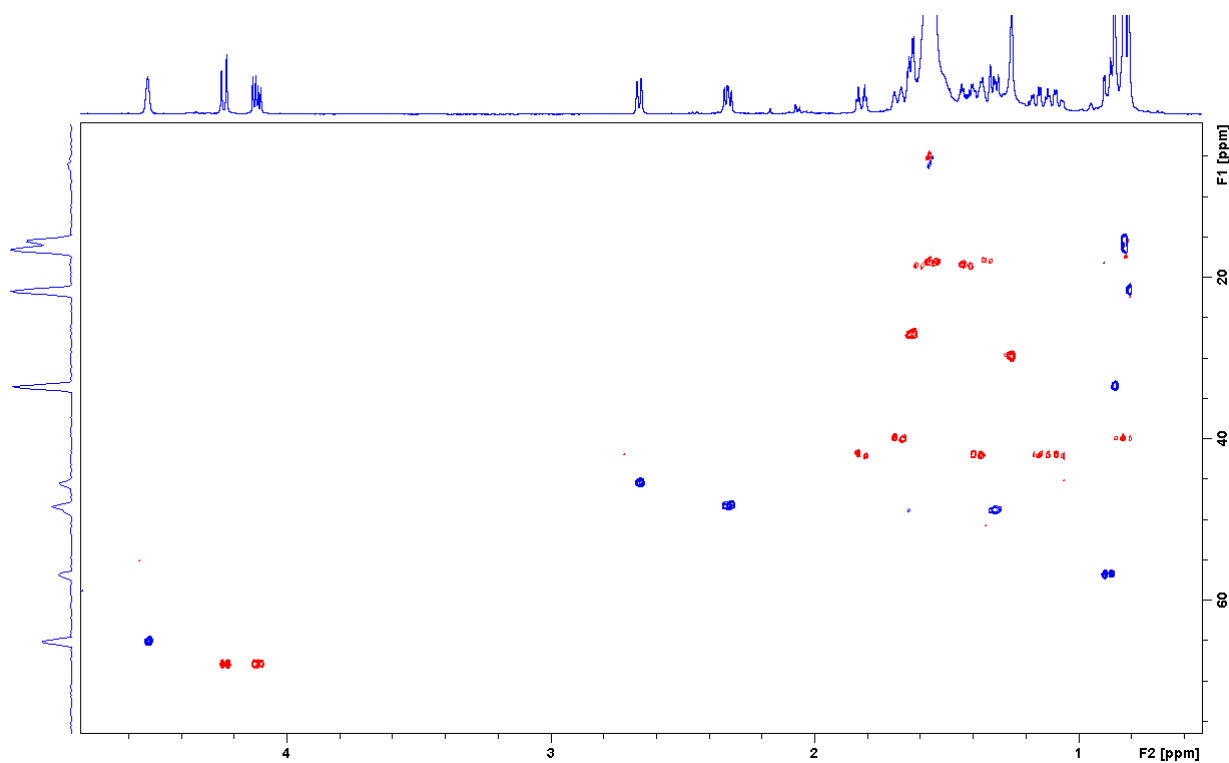

**Figure S38.** HSQC spectrum of **8** (500 MHz,  $\text{CDCl}_3$ ).



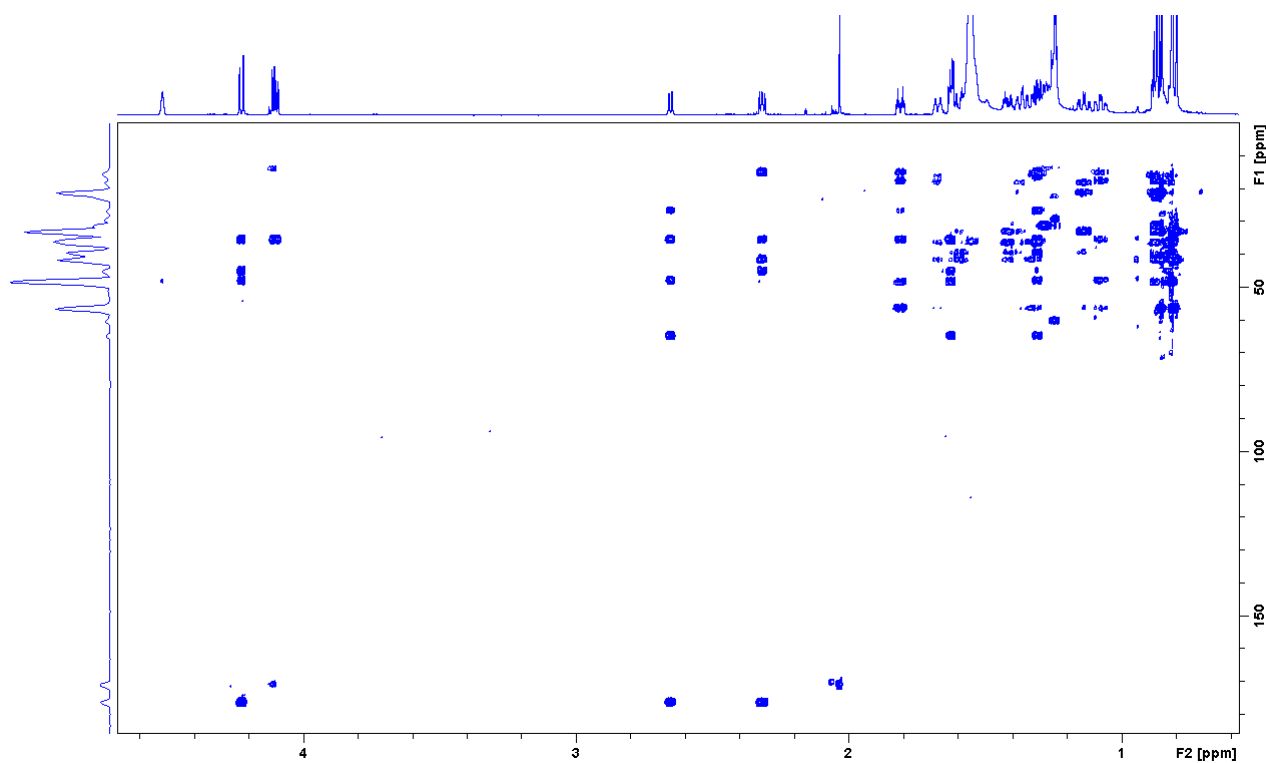

**Figure S39.** HMBC spectrum of **8** (700 MHz,  $\text{CDCl}_3$ ).

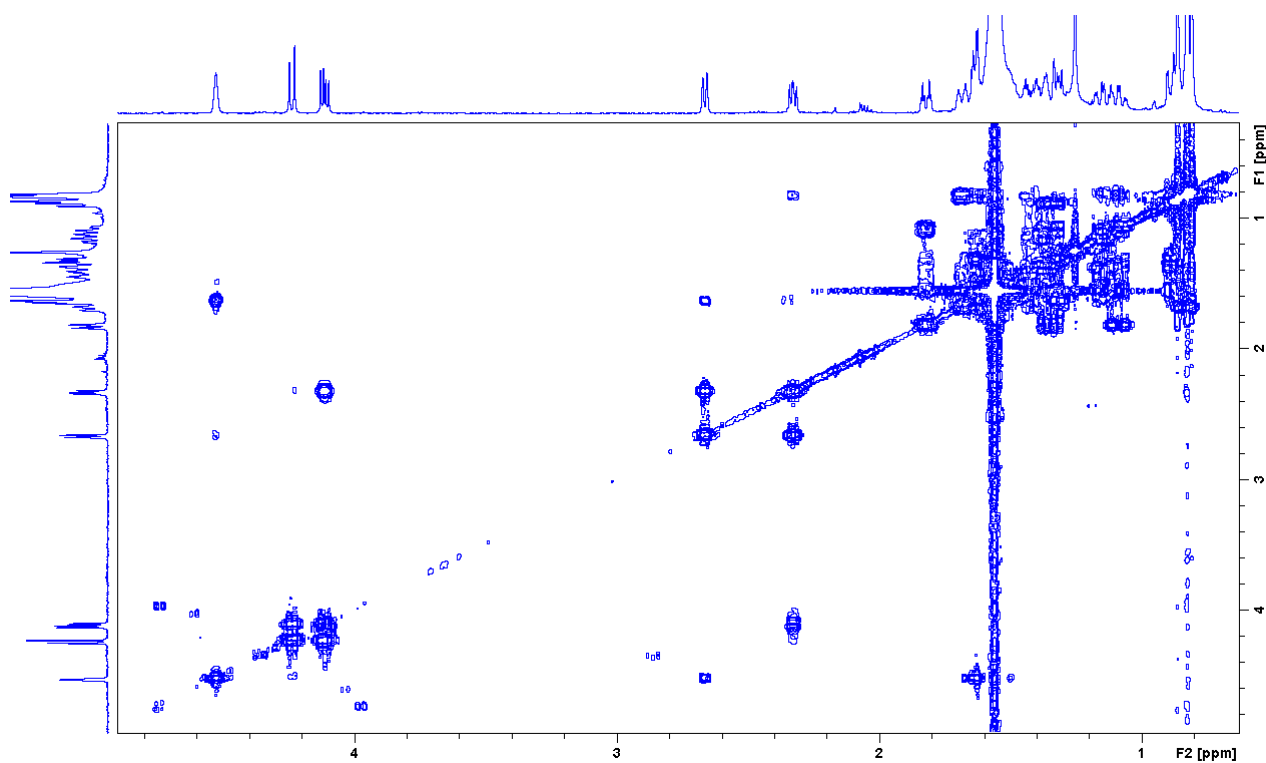

**Figure S40.** COSY spectrum of **8** (500 MHz,  $\text{CDCl}_3$ ).

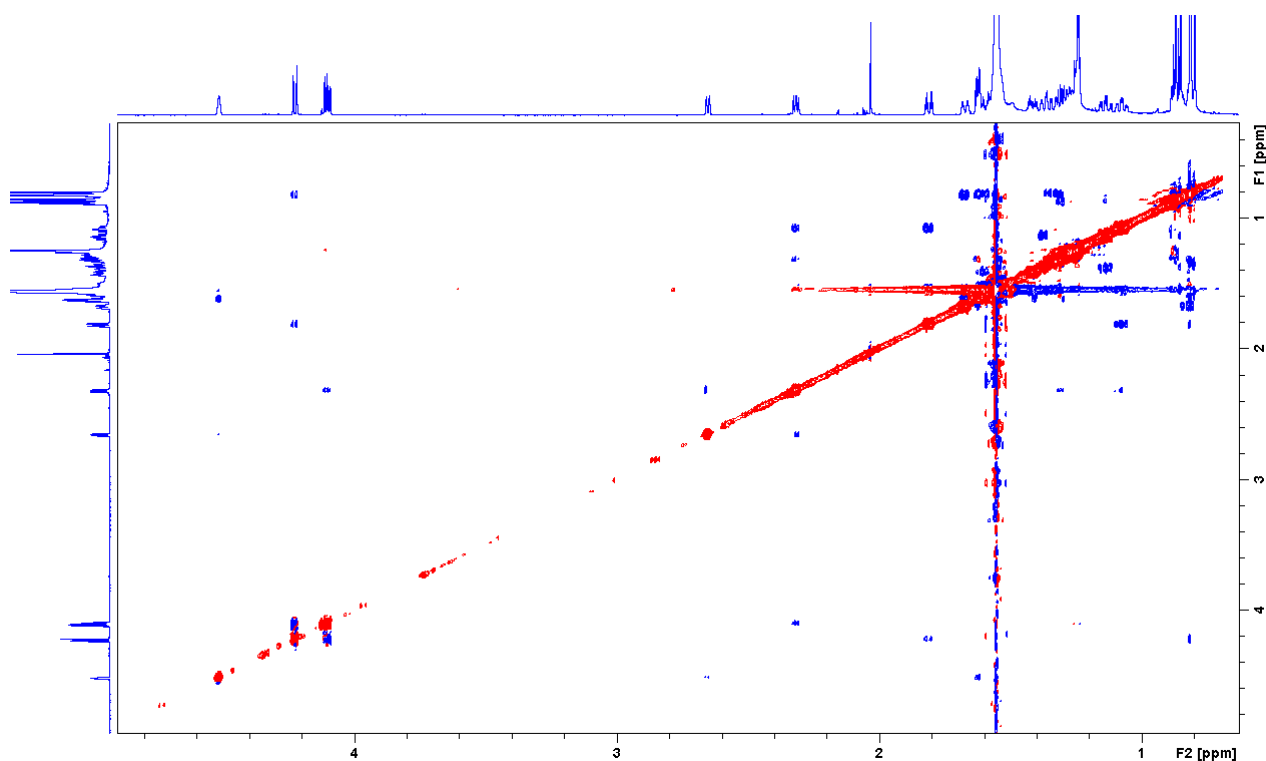

**Figure S41.** NOESY spectrum of **8** (700 MHz, CDCl<sub>3</sub>).

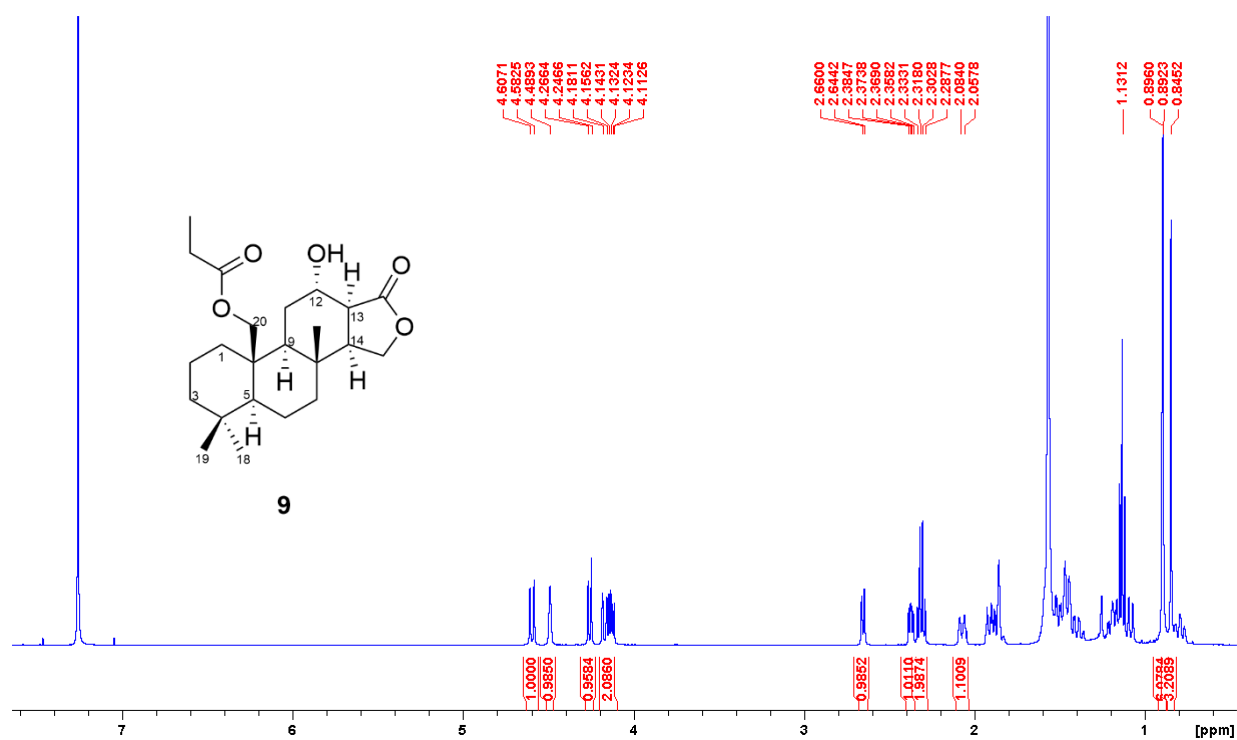

**Figure S42.** <sup>1</sup>H NMR spectrum of **9** (500 MHz, CDCl<sub>3</sub>).

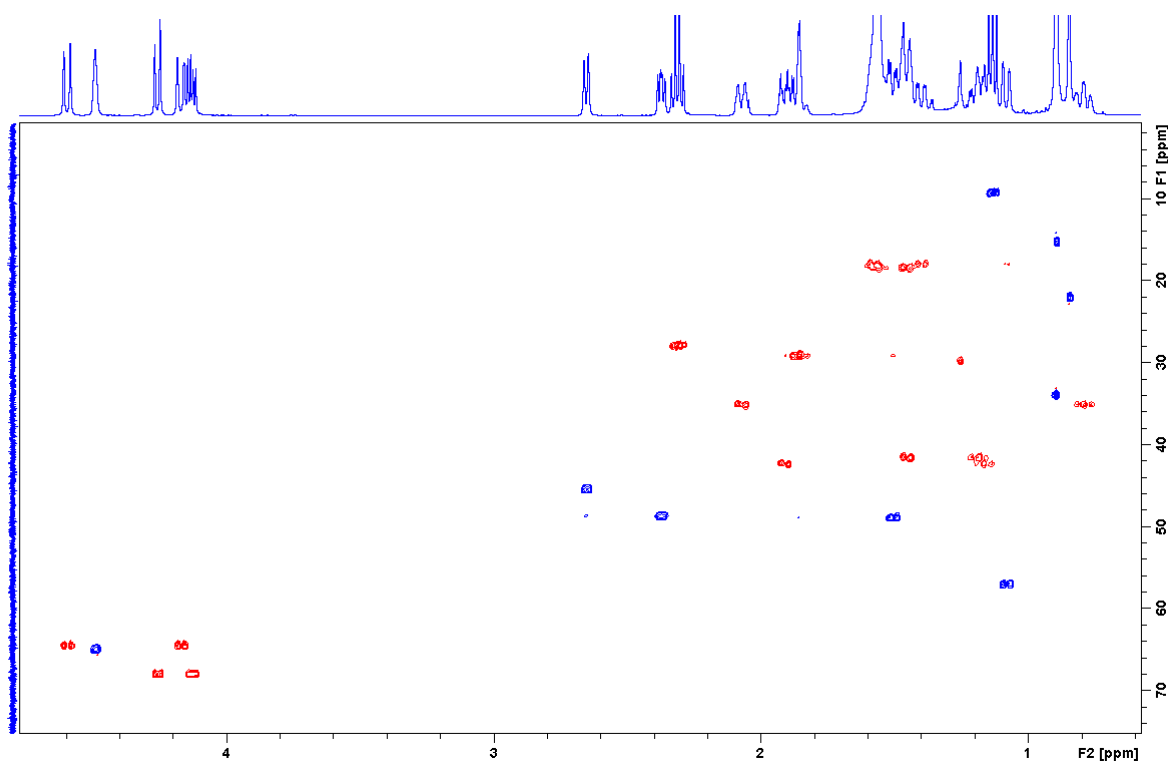

**Figure S43.** HSQC spectrum of **9** (500 MHz,  $\text{CDCl}_3$ ).

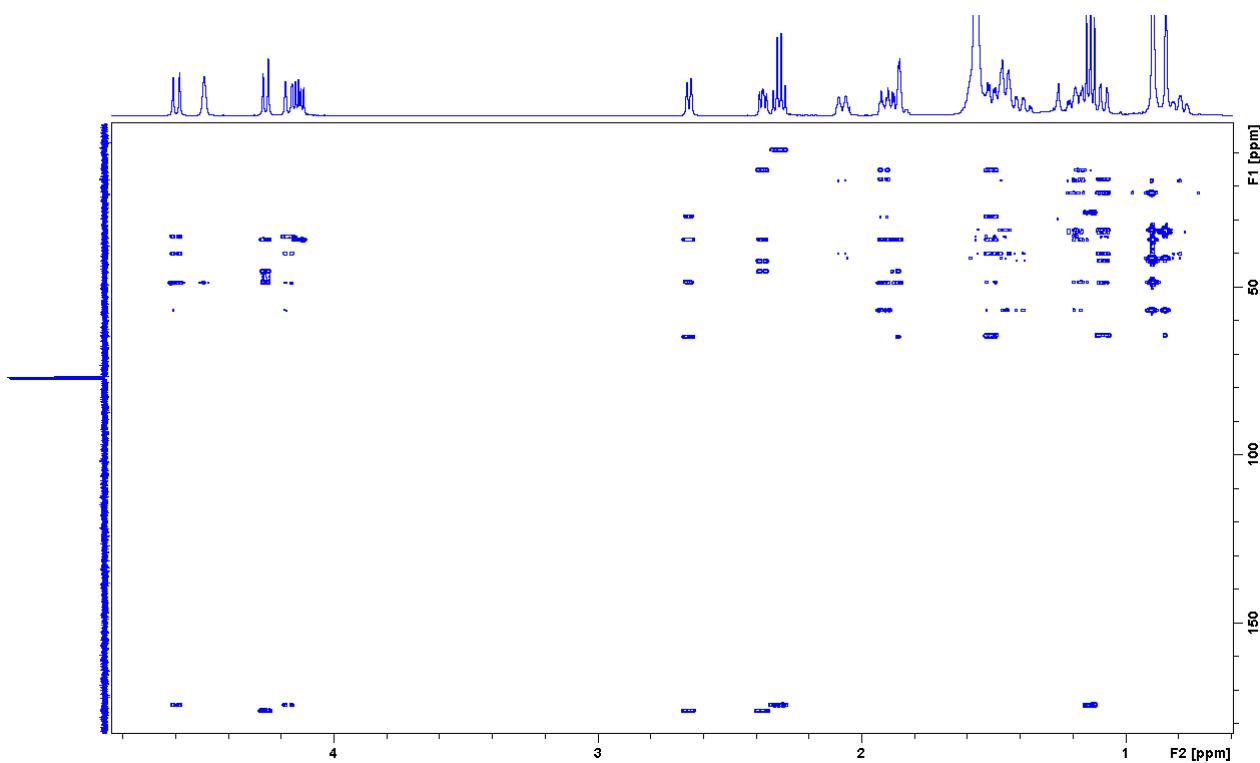

**Figure S44.** HMBC spectrum of **9** (500 MHz,  $\text{CDCl}_3$ ).

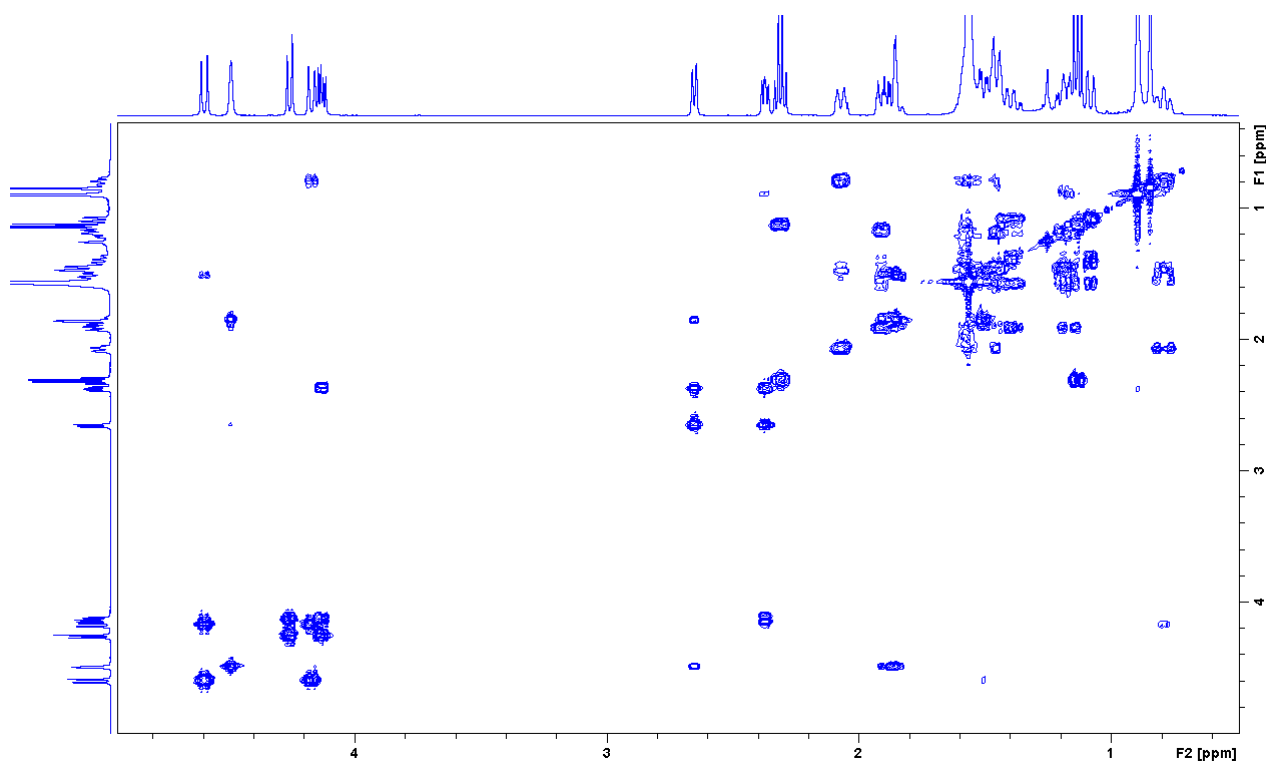

**Figure S45.** COSY spectrum of **9** (500 MHz,  $\text{CDCl}_3$ ).

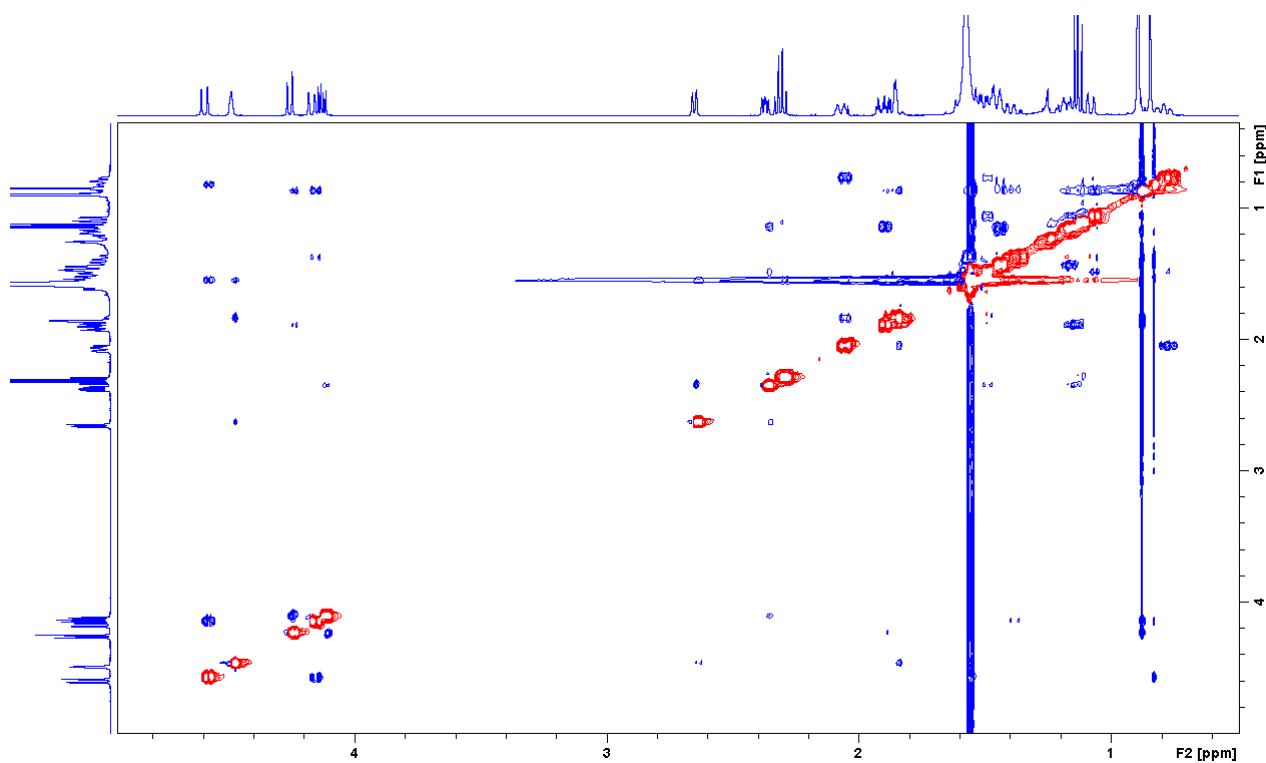

**Figure S46.** NOESY spectrum of **9** (500 MHz,  $\text{CDCl}_3$ ).

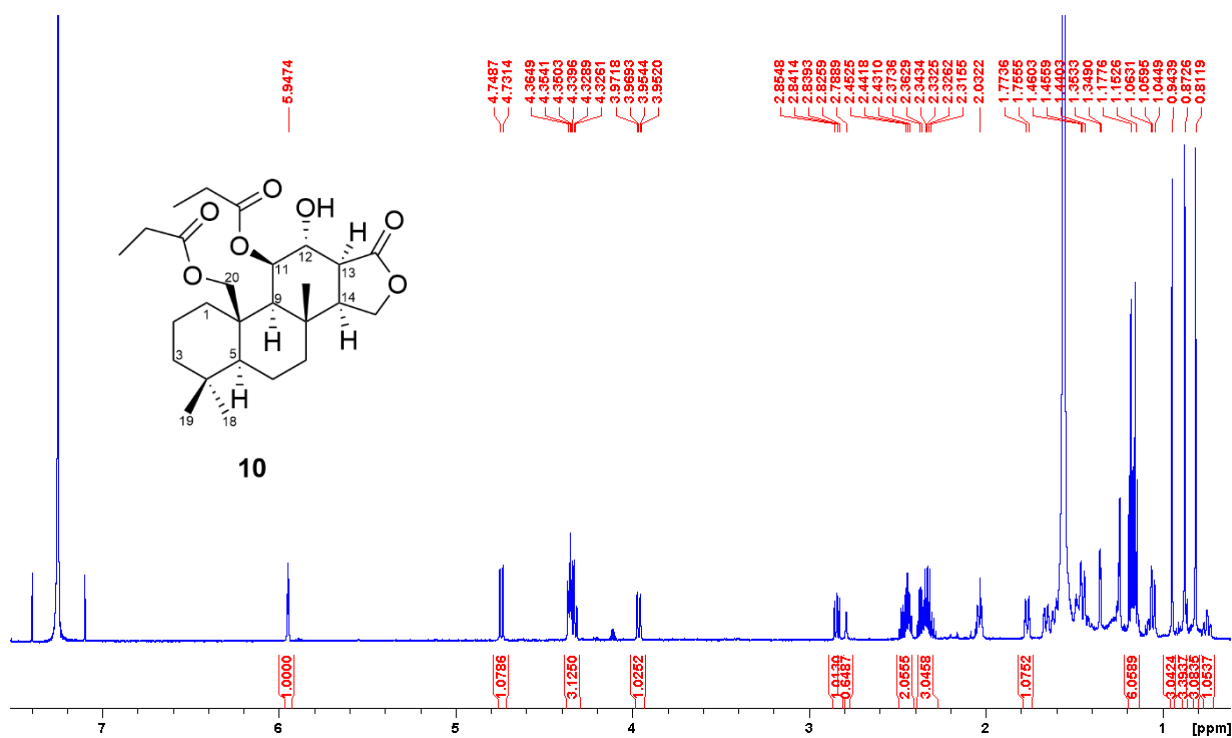

**Figure S47.**  $^1\text{H}$  NMR spectrum of **10** (700 MHz,  $\text{CDCl}_3$ ).

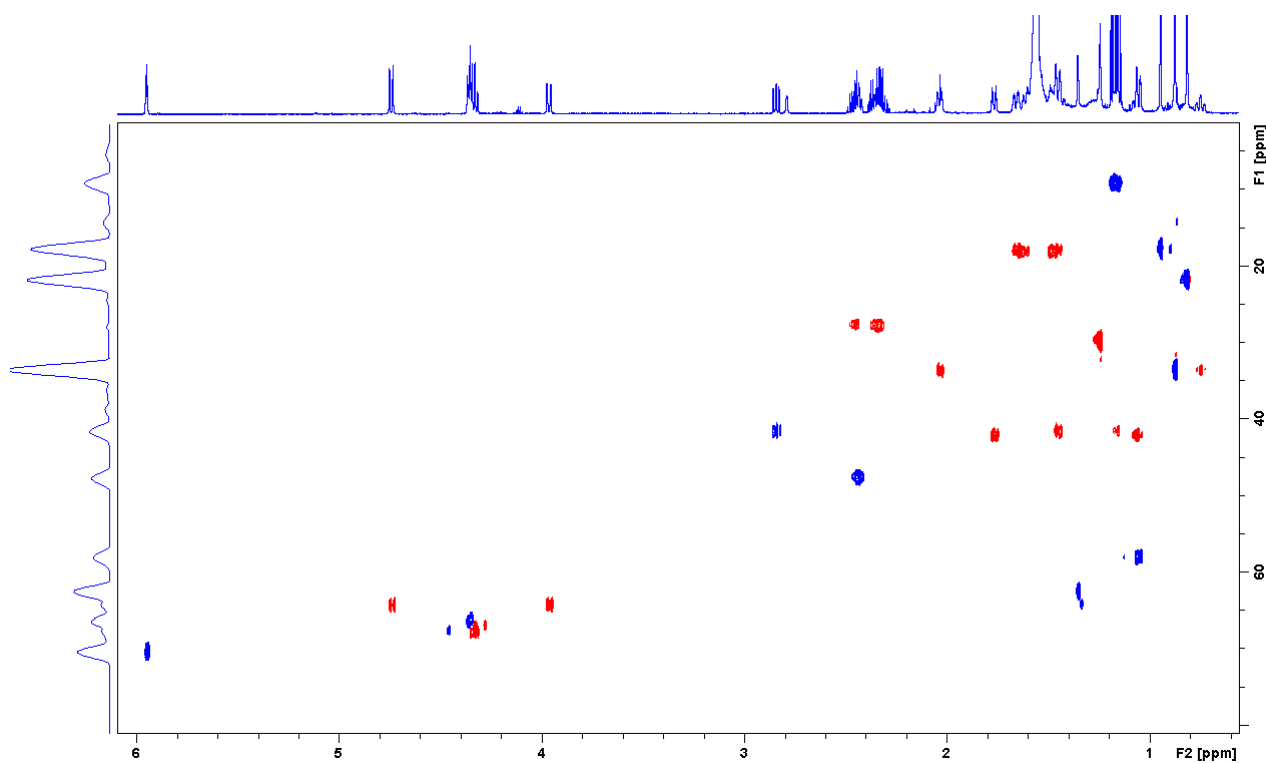

**Figure S48.** HSQC spectrum of **10** (700 MHz,  $\text{CDCl}_3$ ).

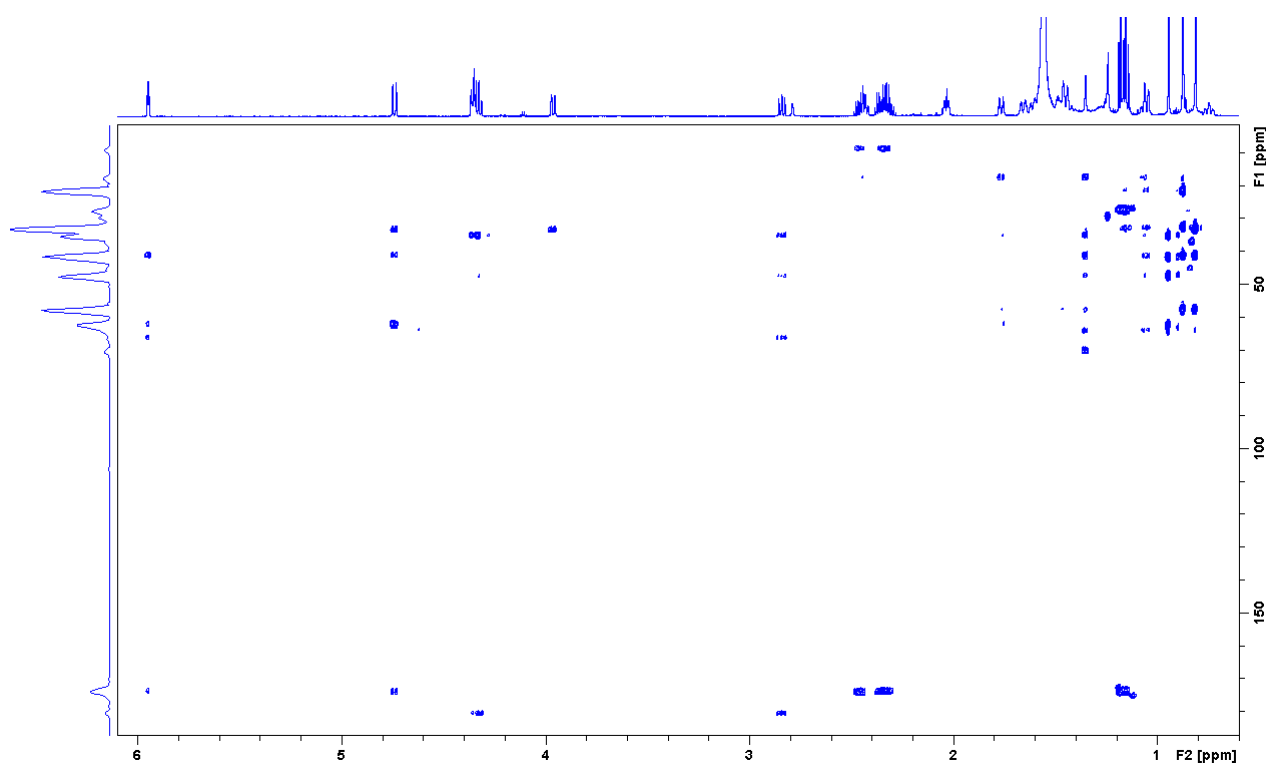

**Figure S49.** HMBC spectrum of **10** (700 MHz, CDCl<sub>3</sub>).

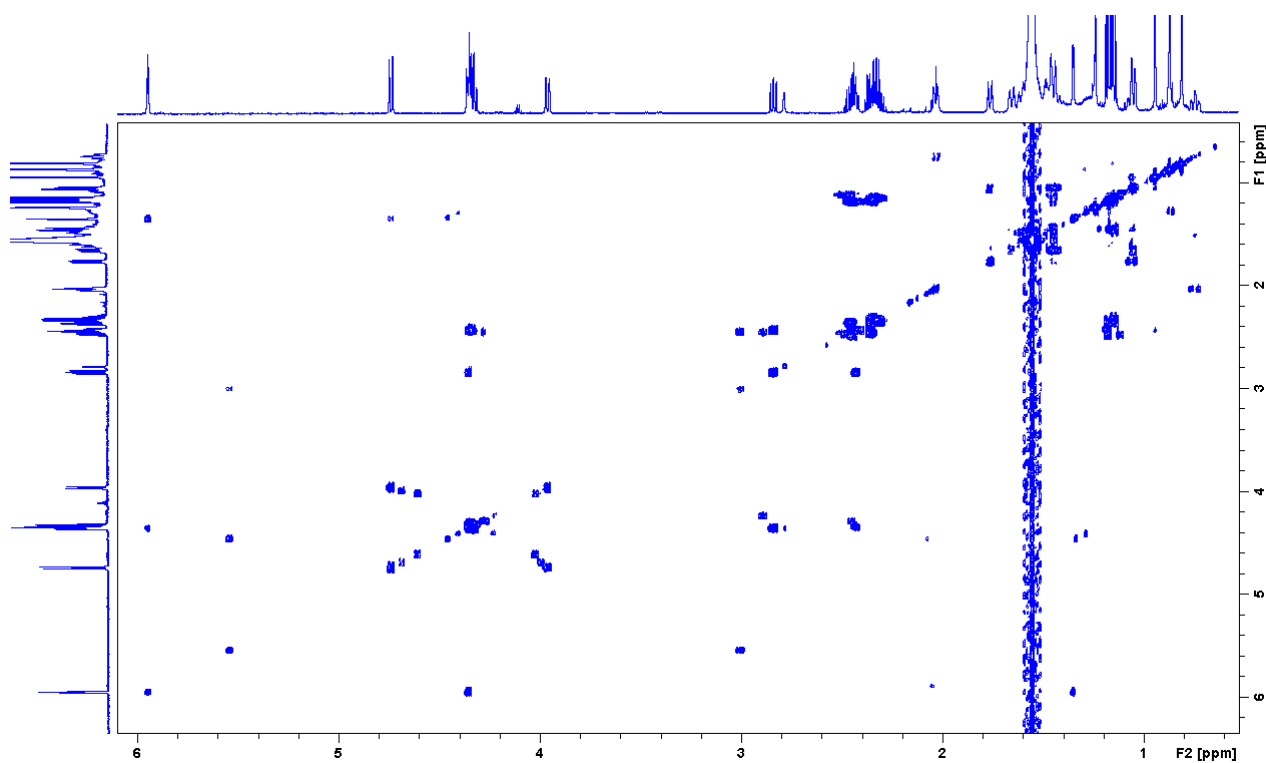

**Figure S50.** COSY spectrum of **10** (700 MHz, CDCl<sub>3</sub>).

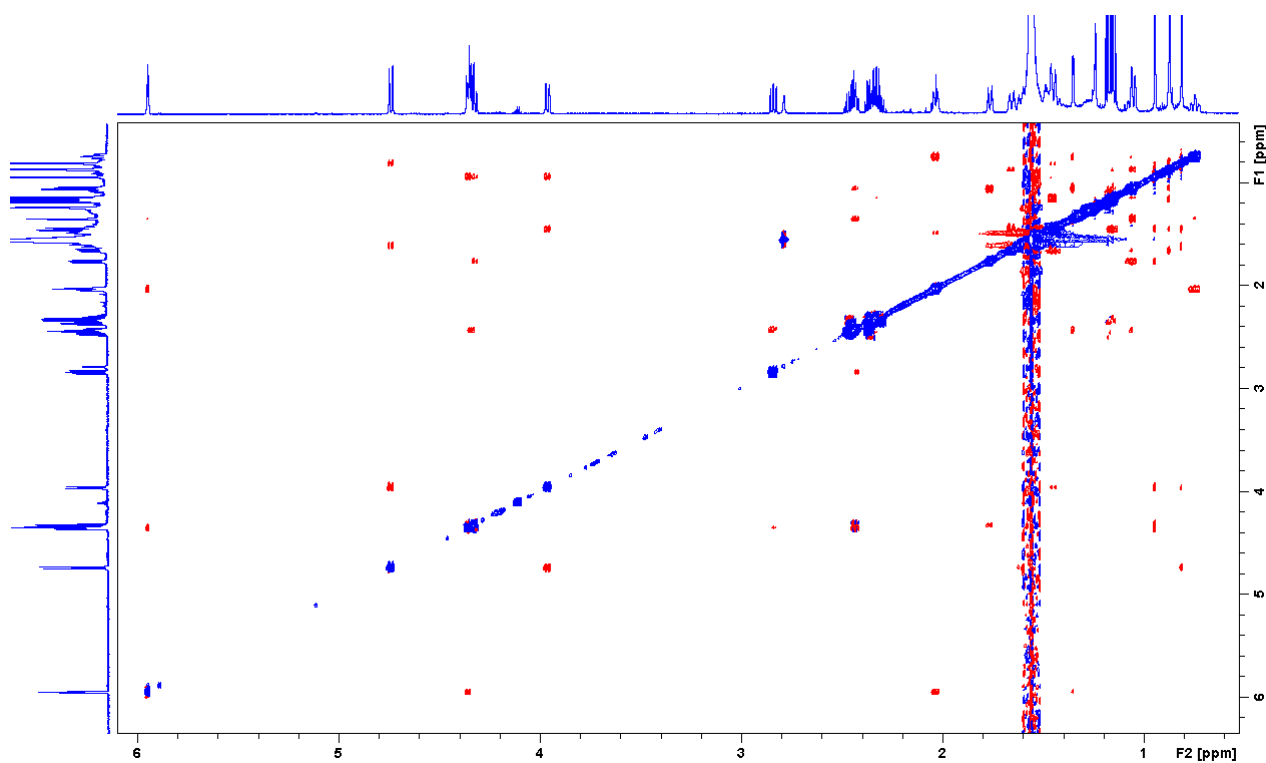

Figure S51. NOESY spectrum of **10** (700 MHz,  $\text{CDCl}_3$ ).

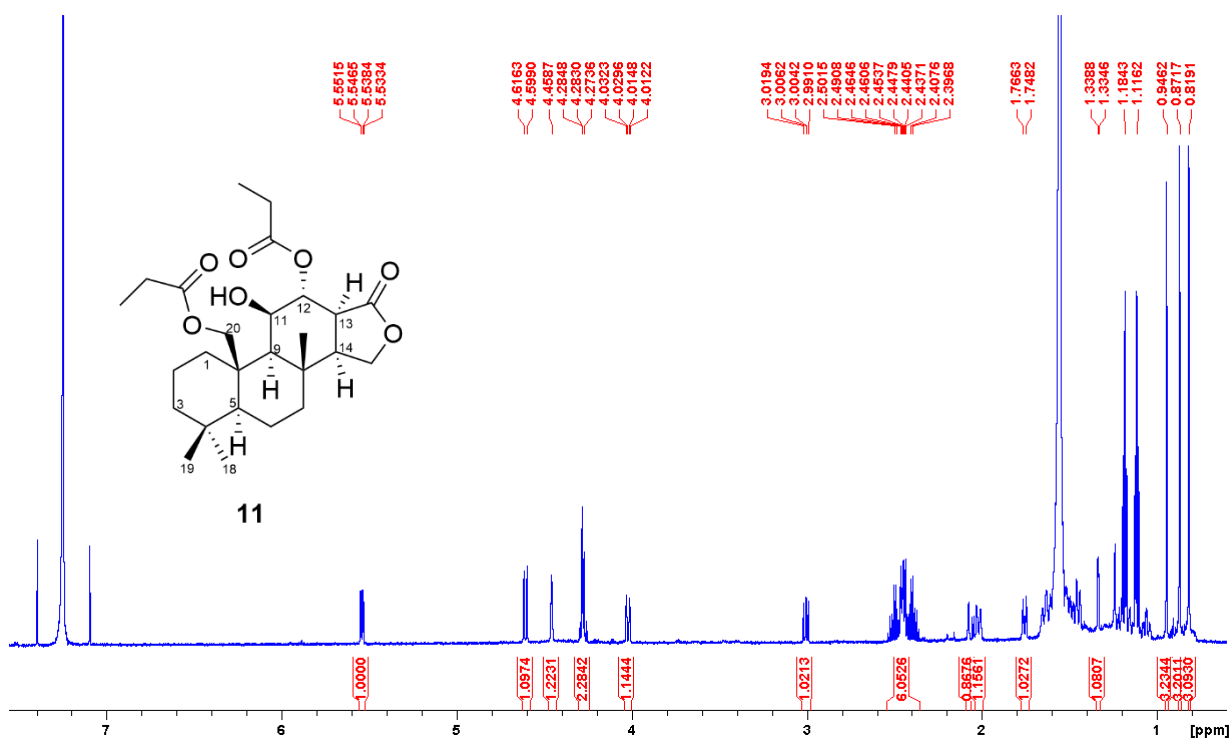

Figure S52.  $^1\text{H}$  NMR spectrum of **11** (700 MHz,  $\text{CDCl}_3$ ).

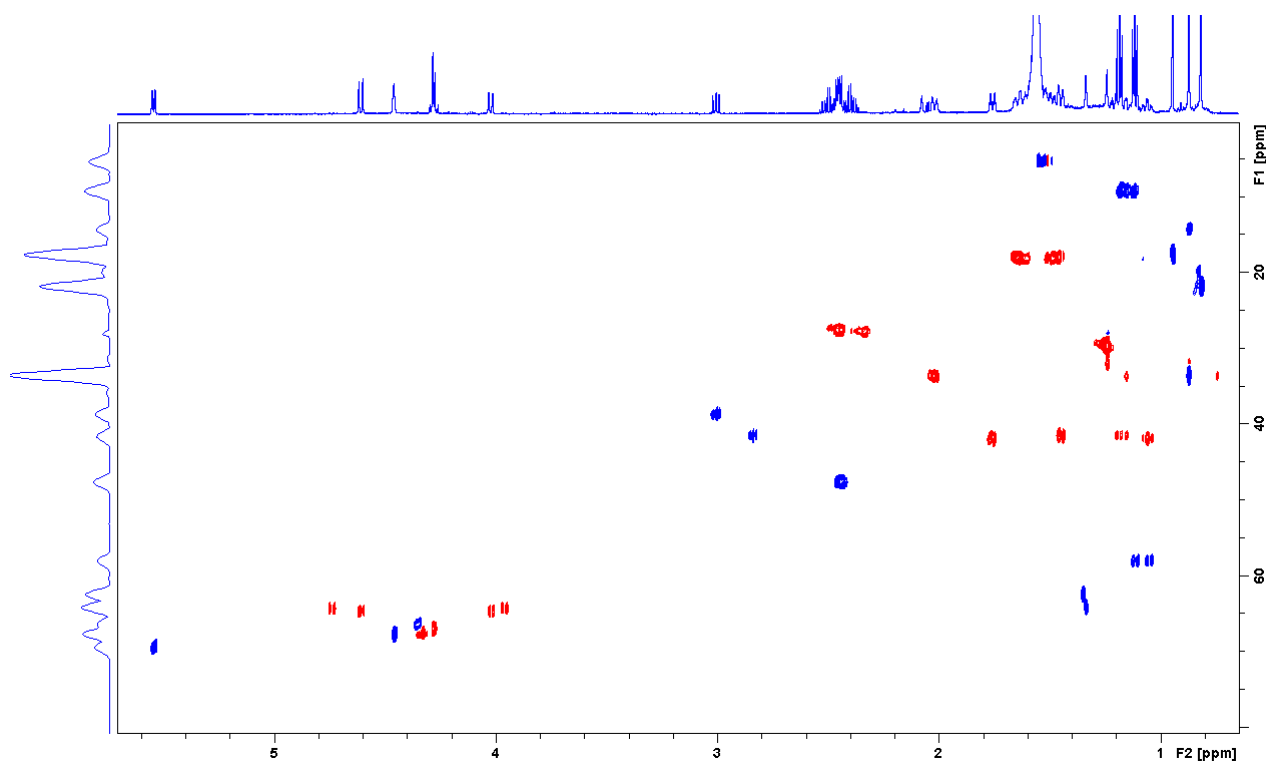

**Figure S53.** HSQC spectrum of **11** (700 MHz, CDCl<sub>3</sub>).

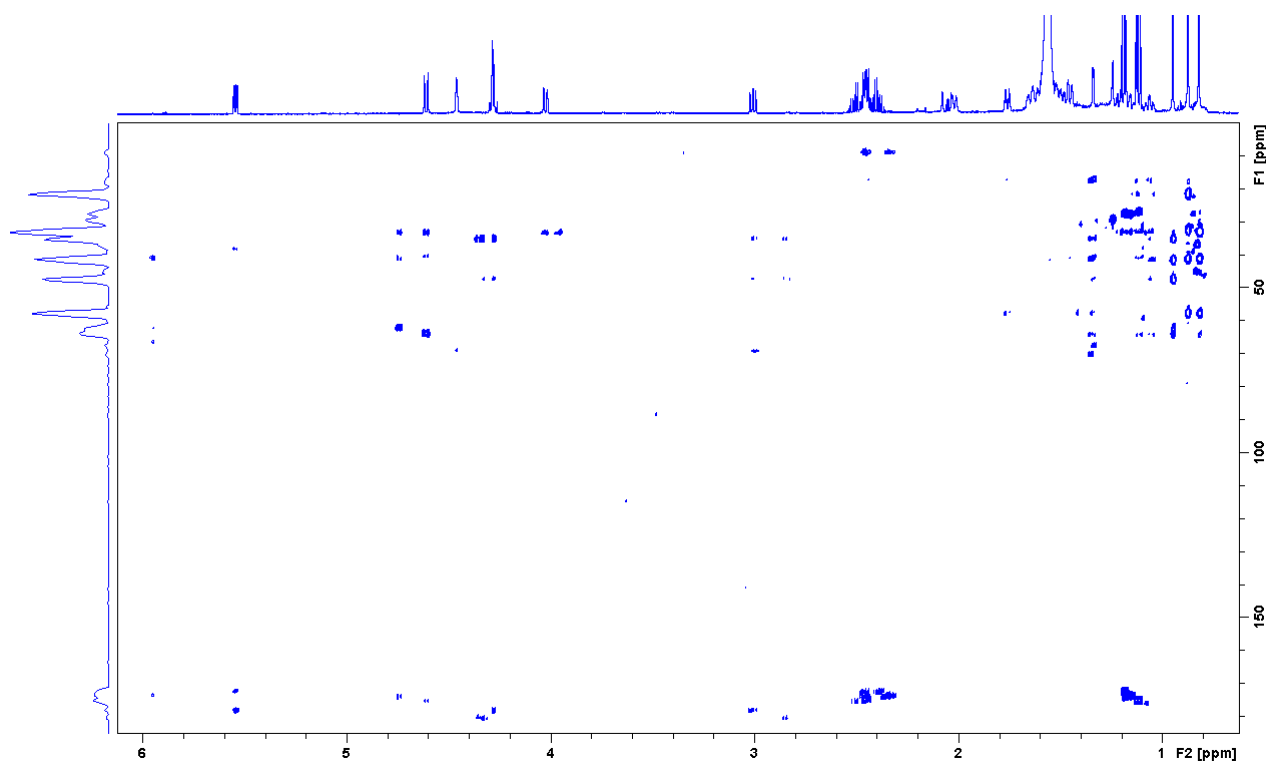

**Figure S54.** HMBC spectrum of **11** (700 MHz, CDCl<sub>3</sub>).



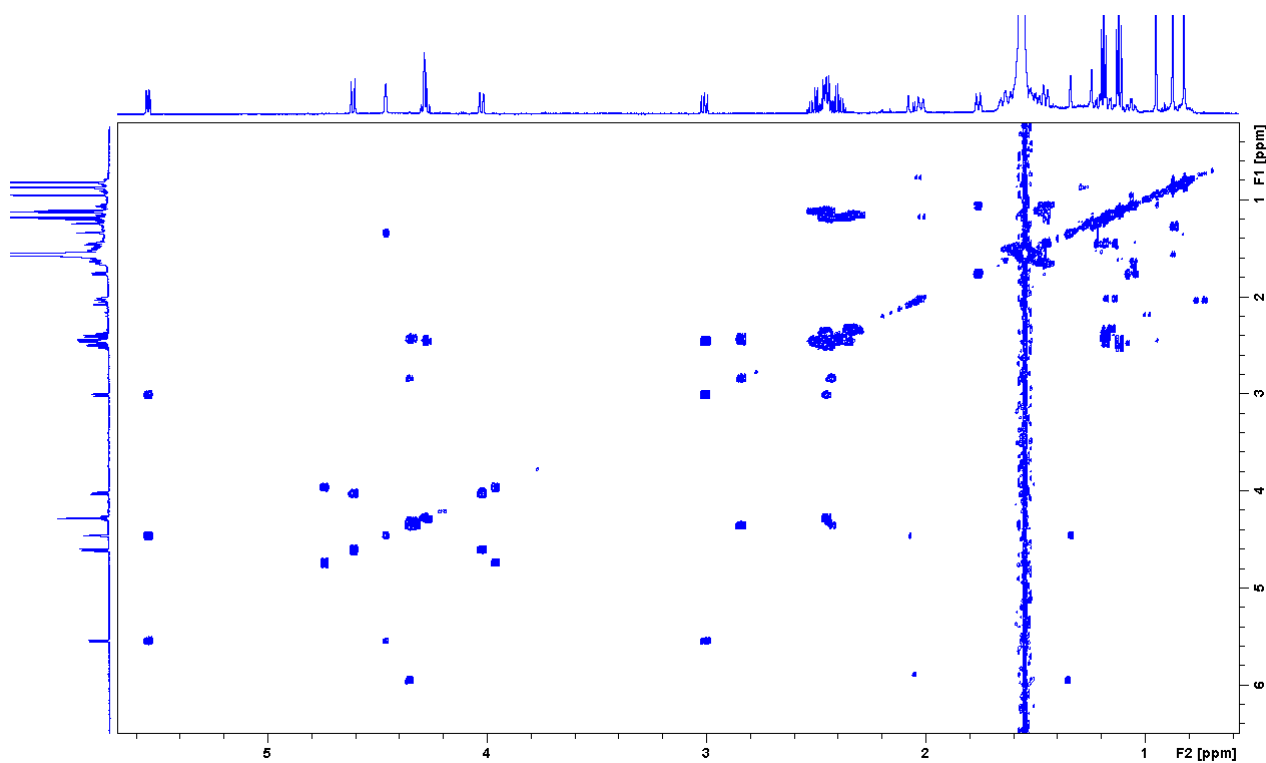

**Figure S55.** COSY spectrum of **11** (700 MHz, CDCl<sub>3</sub>).

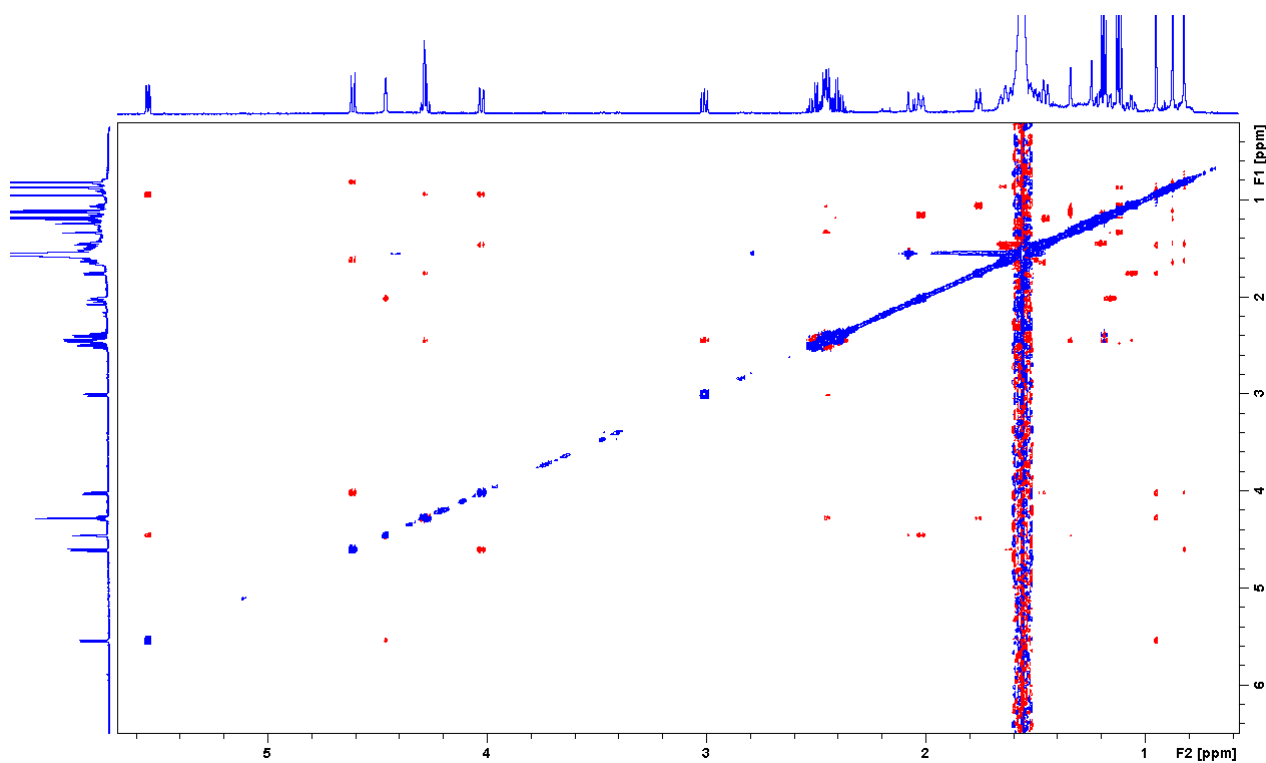

**Figure S56.** NOESY spectrum of **11** (700 MHz, CDCl<sub>3</sub>).

**Figure S57.** Overlay of  $^1\text{H}$  NMR spectra for the mantle of six specimens of *G. aureopurpureus* (500 MHz,  $\text{CDCl}_3$ ).

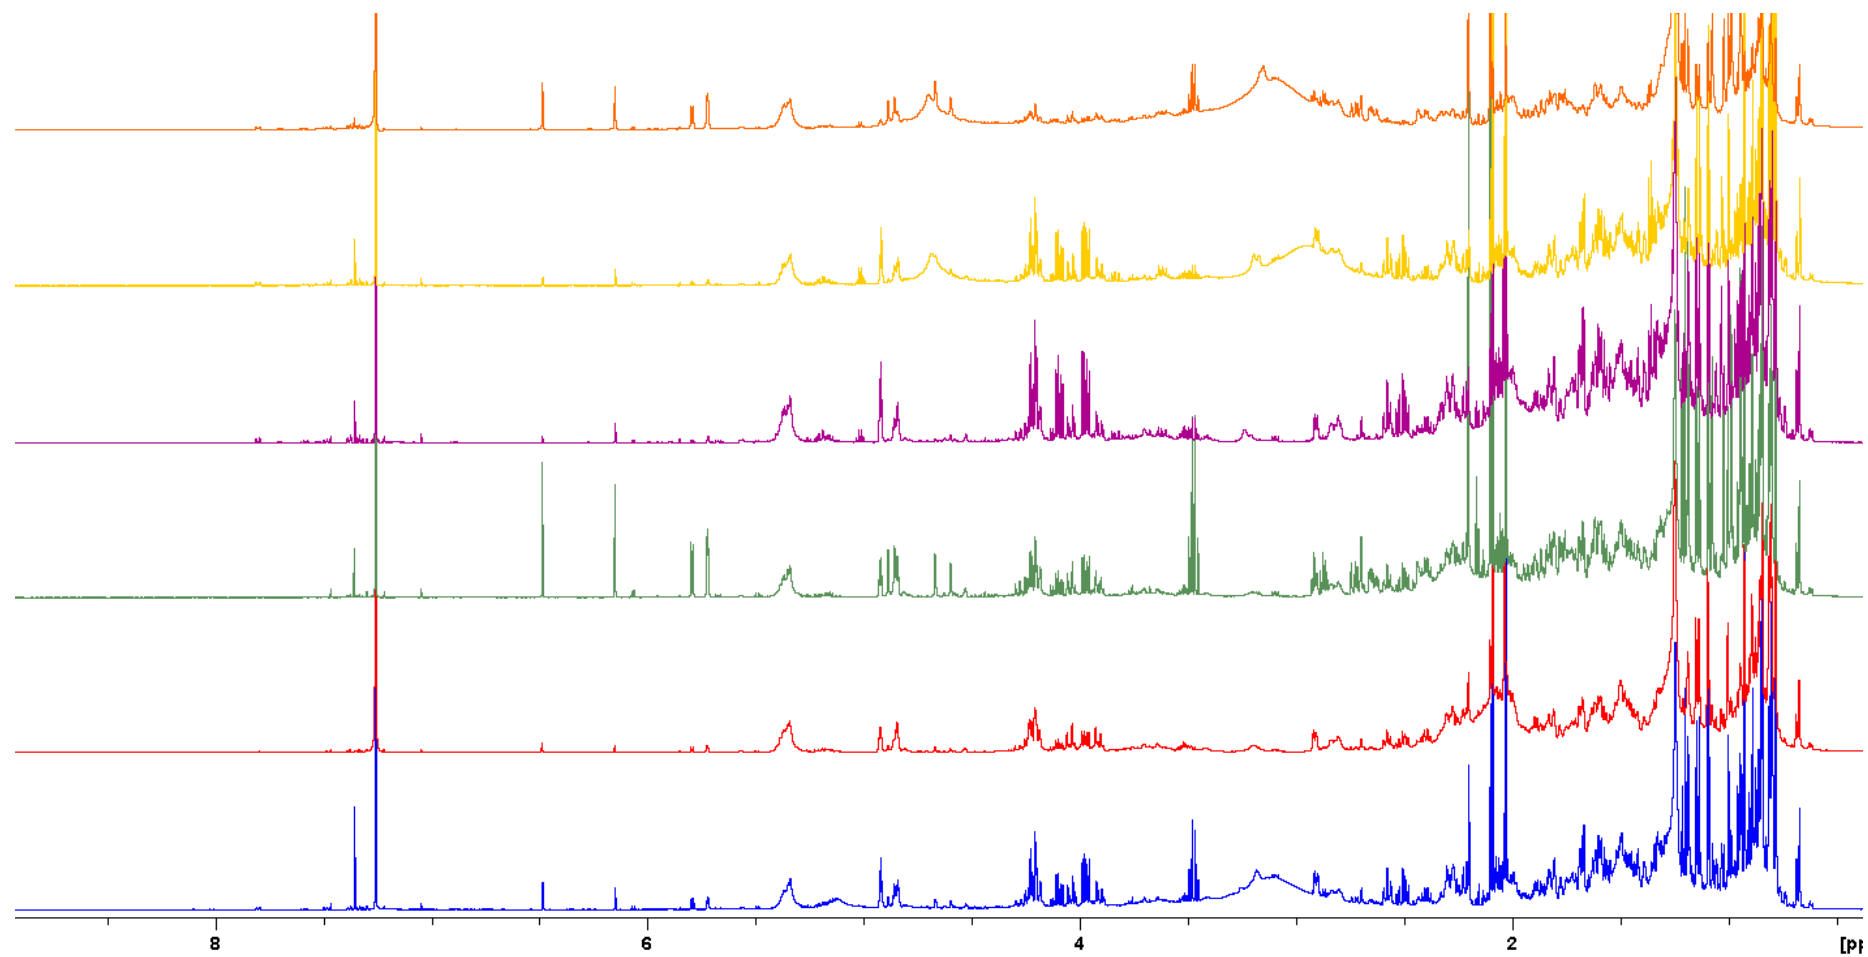

**Figure S58.** Overlay of  $^1\text{H}$  NMR spectra for the viscera of six specimens of *G. aureopurpureus* (500 MHz,  $\text{CDCl}_3$ ).

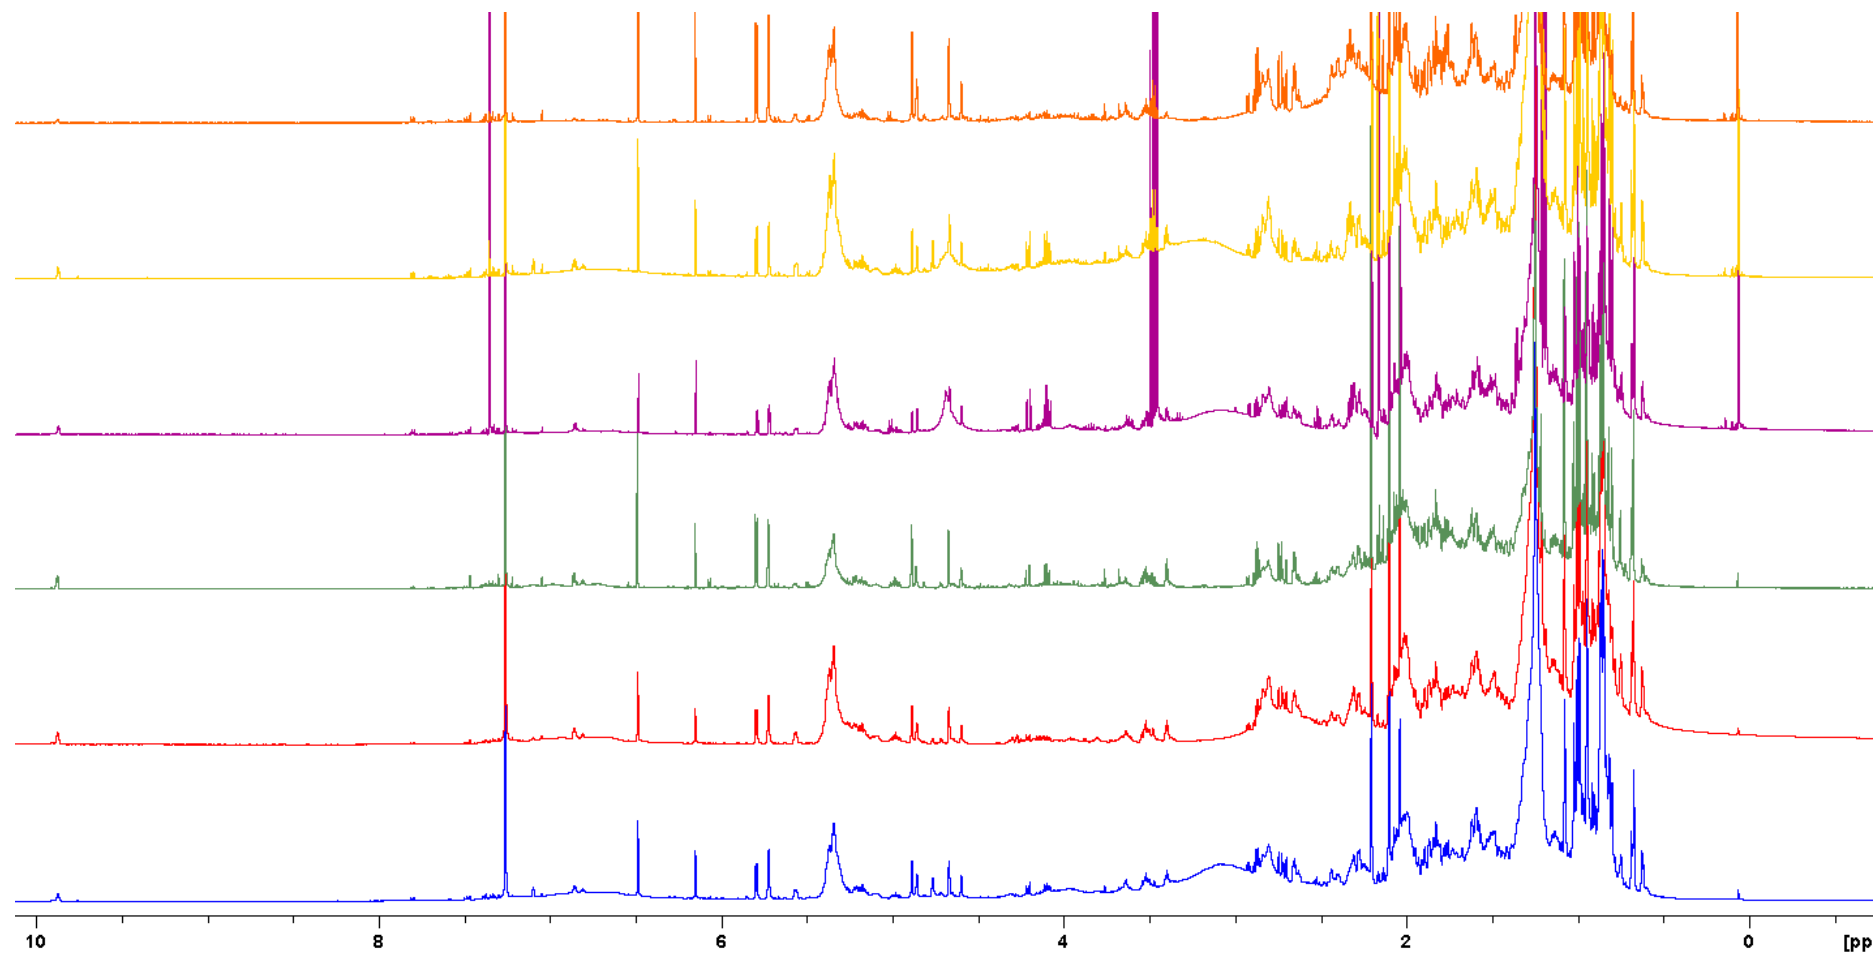

**Figure S59.** Overlay of  $^1\text{H}$  NMR spectra for the mantle and viscera of *G. aureopurpureus* (500 MHz,  $\text{CDCl}_3$ ).

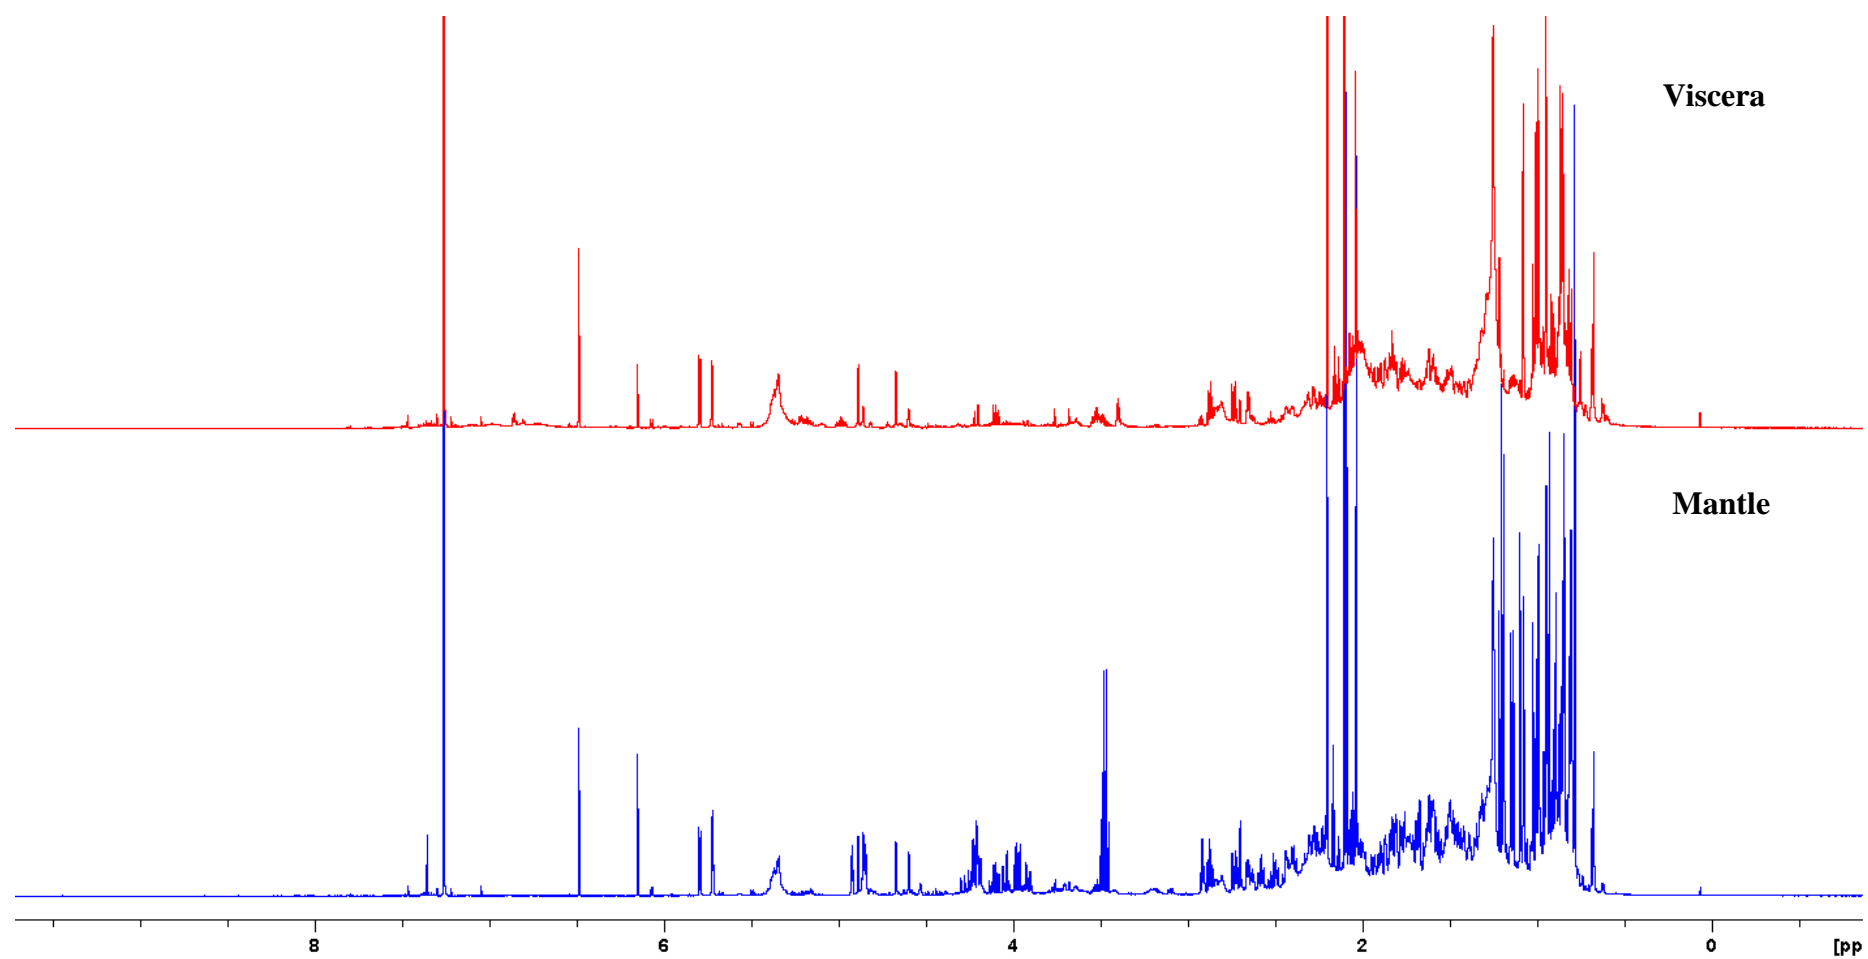

**Figure S60.** Overlay of  $^1\text{H}$  NMR spectra for the mantle of three specimens of *Goniobranchus sp.1* (500 MHz,  $\text{CDCl}_3$ ).

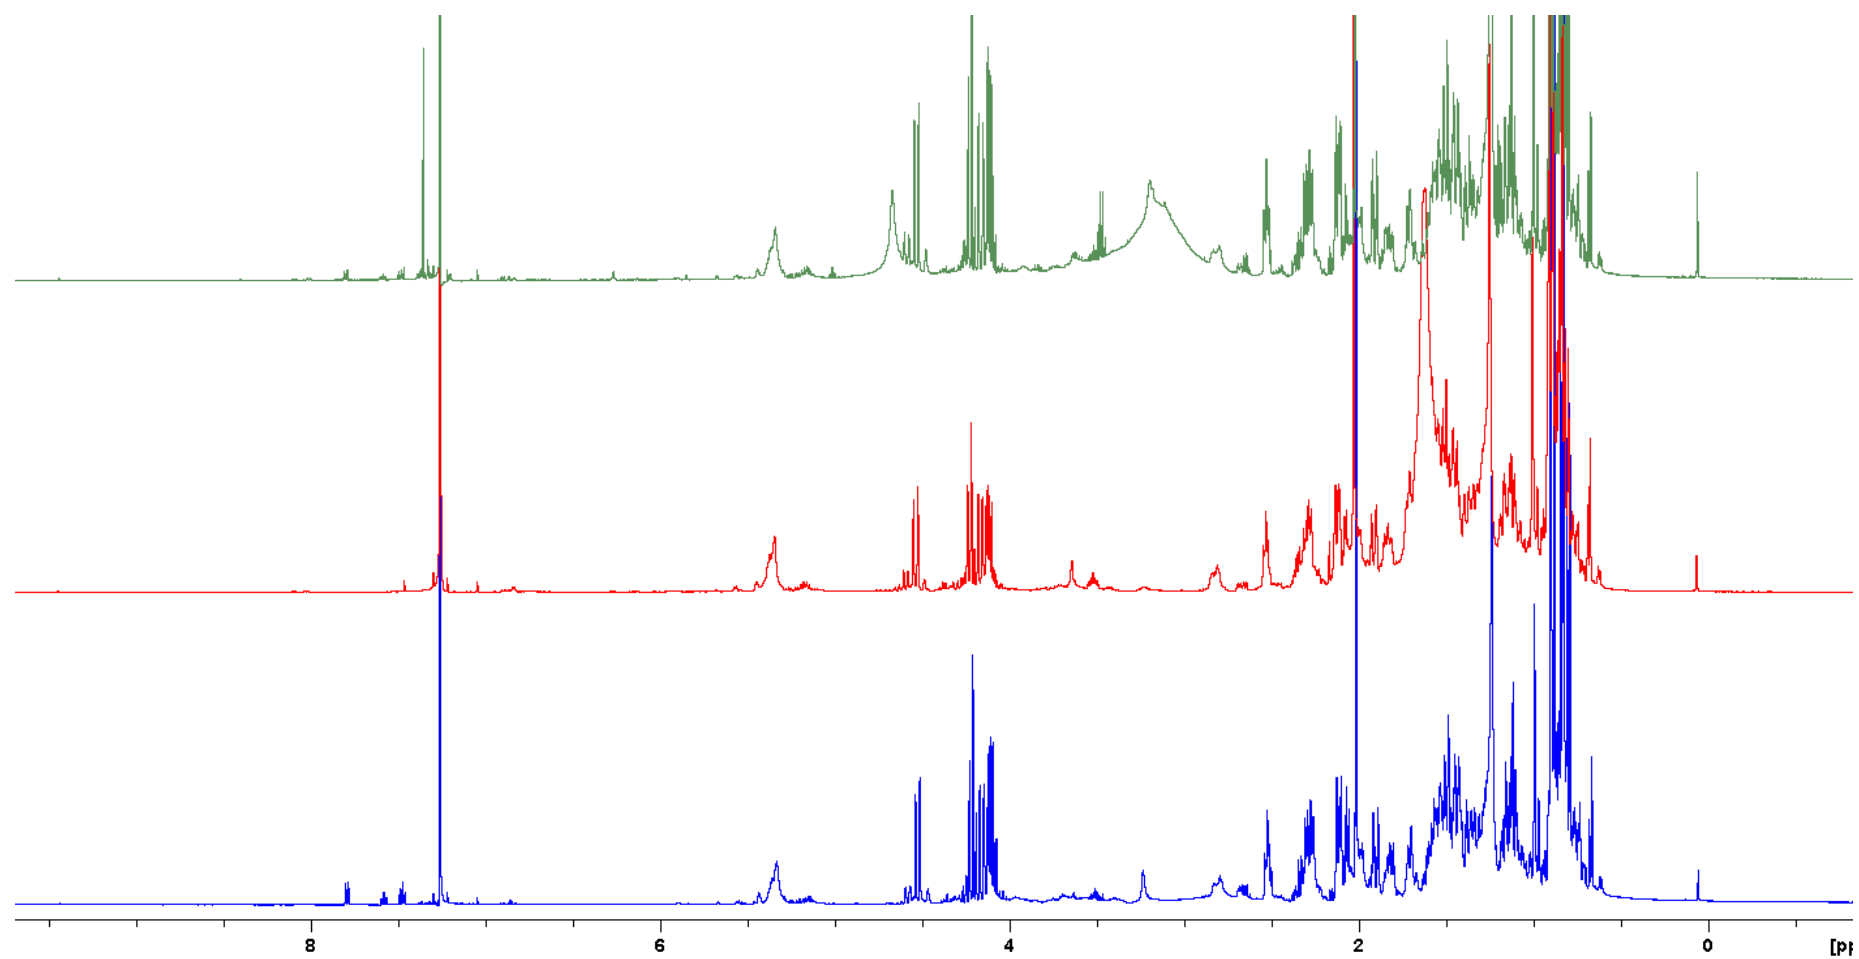

**Figure S61.** Overlay of  $^1\text{H}$  NMR spectra for the viscera of three specimens of *Goniobranchus sp.1* (500 MHz,  $\text{CDCl}_3$ ).

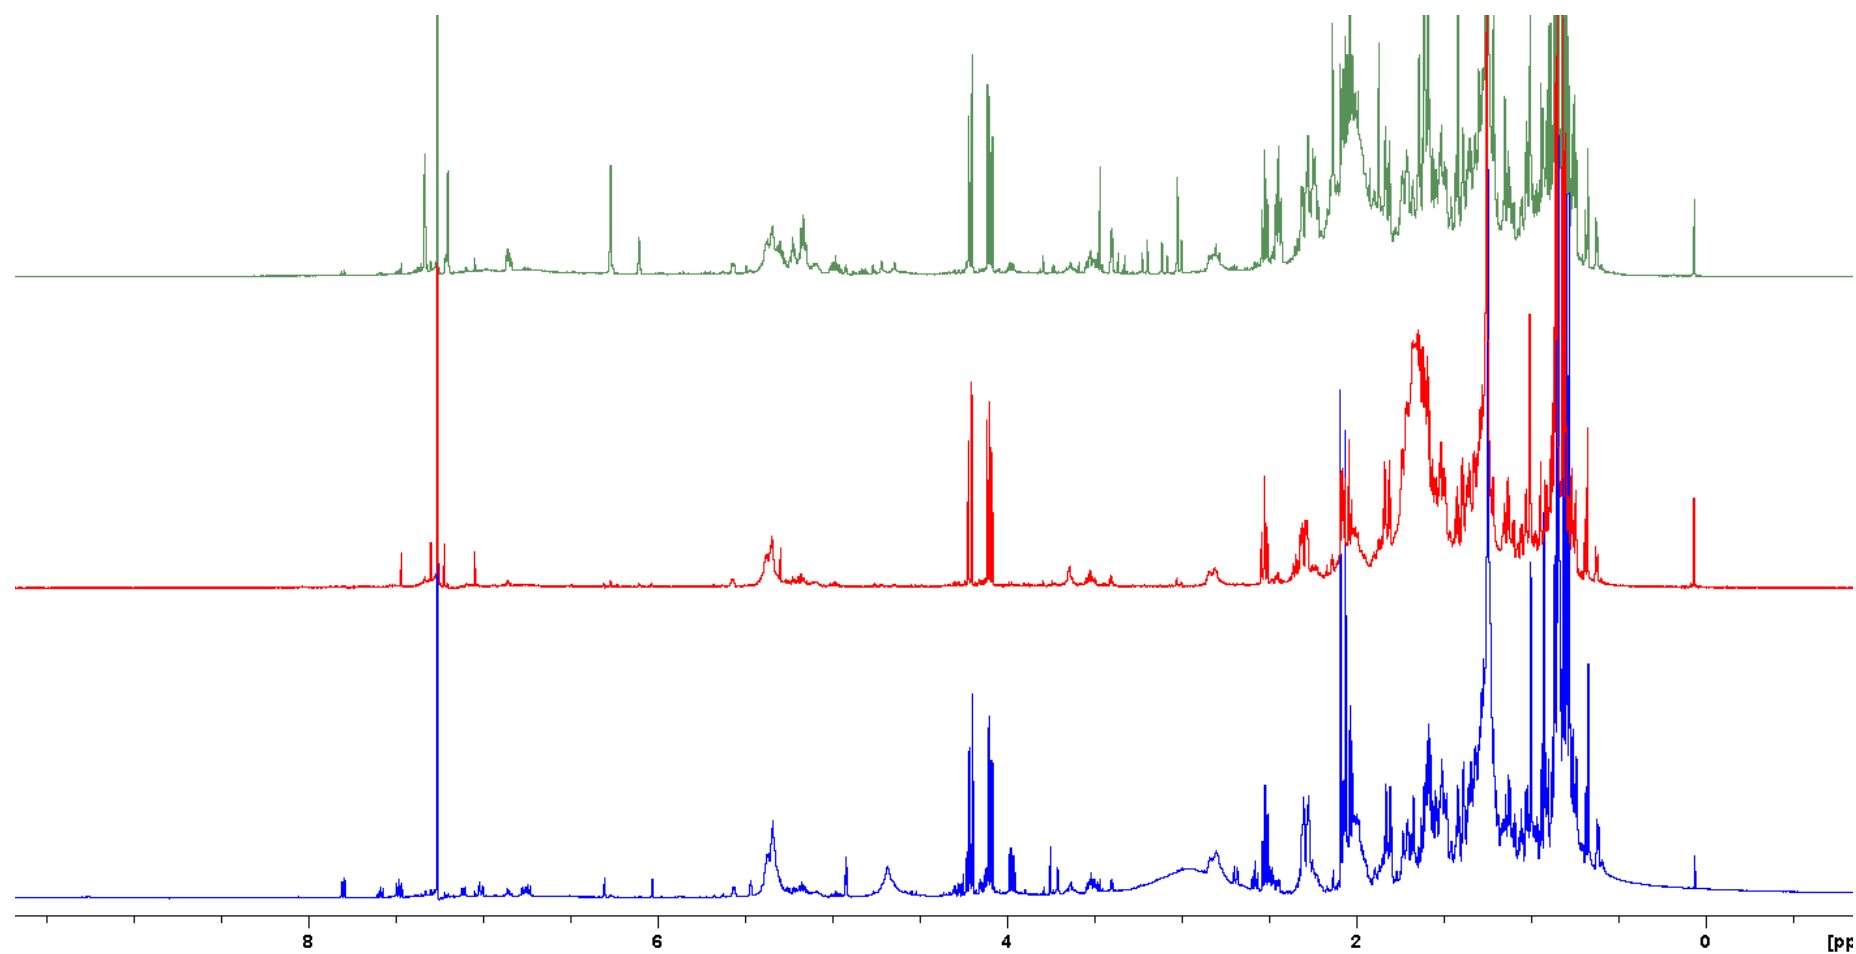

**Figure S62.** Overlay of  $^1\text{H}$  NMR spectra for the mantle and viscera of *Goniobranchus sp.1* (500 MHz,  $\text{CDCl}_3$ ).

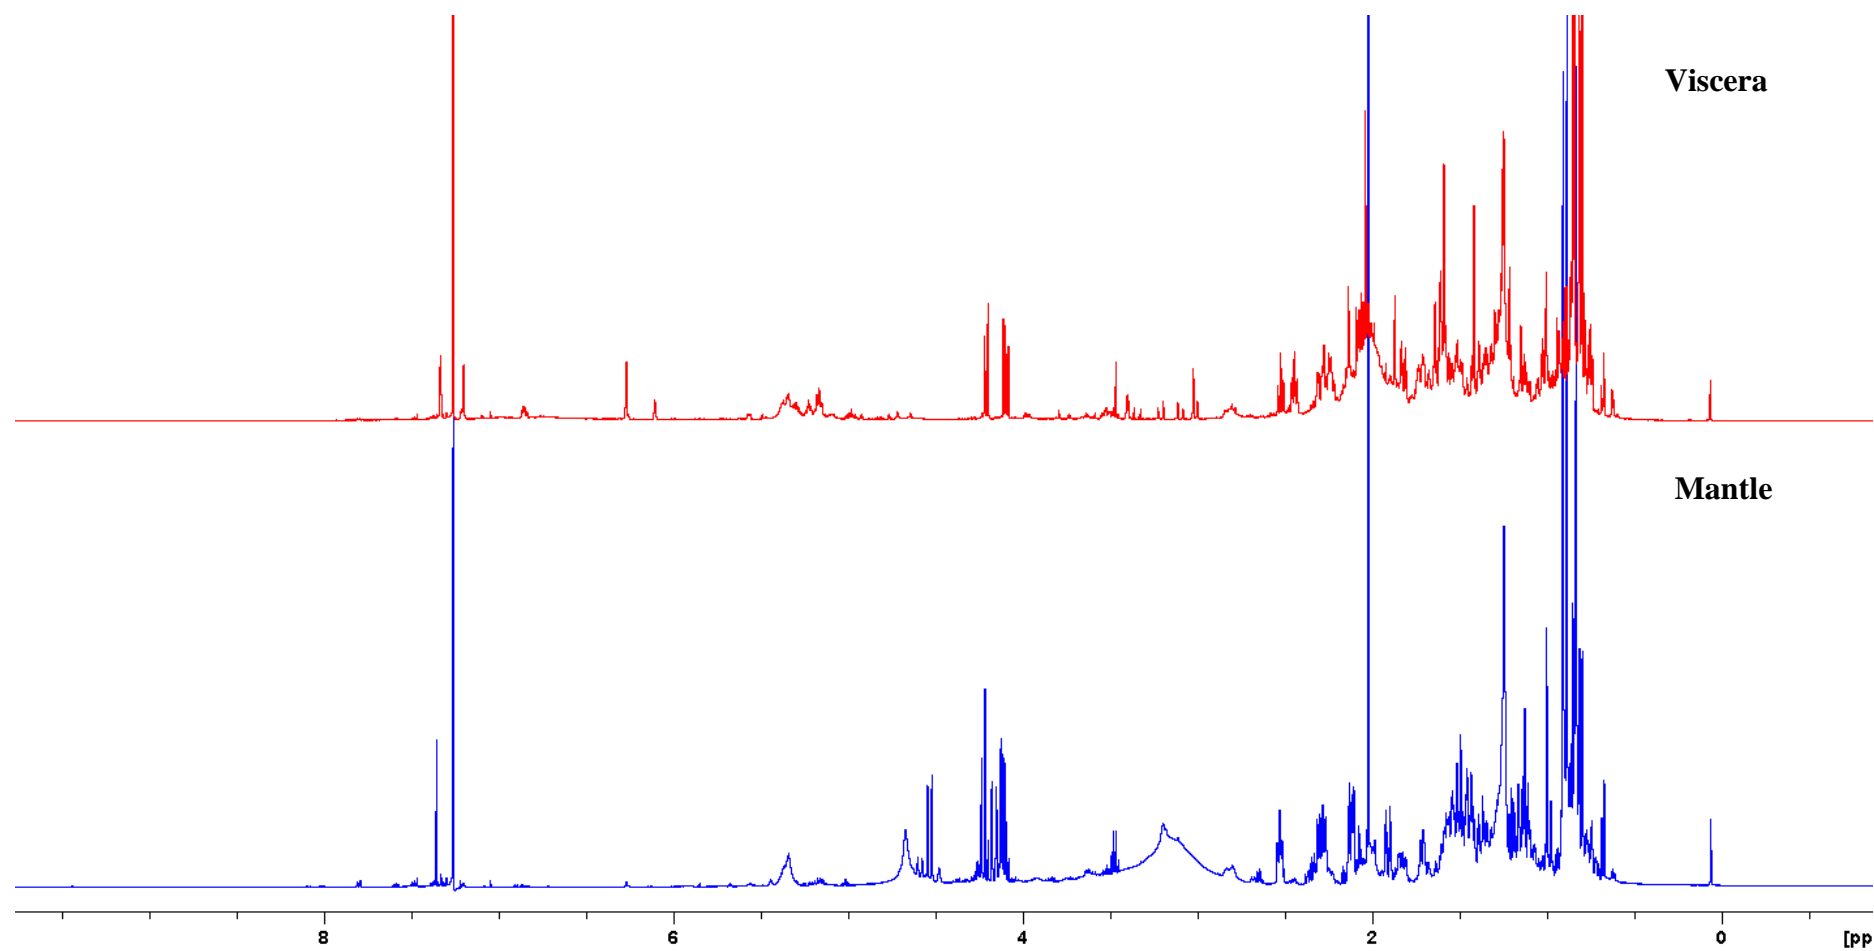

Supplement: s1 [file s1]
